# Supplementary material
Source: PubMed Central journal article supplement (PMC2676019)
Supplement: M806546200_1.pdf [file M806546200_1.pdf]

**Supplemental Figure 1.**

MM.1s cells were treated with 100 nM of Bortezomib for 2 h, washed with supplemented-RPMI and treated with CHX (10  $\mu$ g/mL) or CHX plus ATO (2  $\mu$ M) for 1.5, 2, 2.5 and 3 h. Nrf2 protein expression was analyzed by Western Blot.

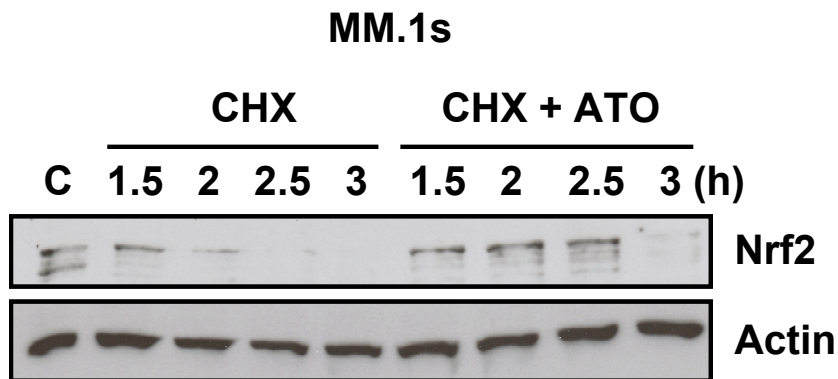

**Supplemental Table - 1**

**LogRatios for up-regulated genes at 6 h in all cell lines**

**Two-fold changes are in red bold**

| <b>Gene Descriptor</b>                                                | <b>Symbol</b> | <b>U266<br/>6h</b> | <b>MM.1s<br/>6h</b> | <b>8226/S<br/>6h</b> | <b>KMS11<br/>6h</b> |
|-----------------------------------------------------------------------|---------------|--------------------|---------------------|----------------------|---------------------|
| 3-hydroxyisobutyryl-Coenzyme A hydrolase                              | HIBCH         | 0.6                | 0.8                 | 0.8                  | <b>1.1</b>          |
| 3-hydroxyisobutyryl-Coenzyme A hydrolase                              | HIBCH         | 0.6                | 0.8                 | 0.7                  | <b>1.2</b>          |
| 82-kD FMRP Interacting Protein                                        | 182-FIP       | 0.6                | 0.6                 | 0.6                  | 0.4                 |
| 82-kD FMRP Interacting Protein                                        | 182-FIP       | 0.5                | 0.5                 | 0.7                  | 0.3                 |
| abhydrolase domain containing 4                                       | ABHD4         | 0.6                | 0.6                 | 0.7                  | 0.8                 |
| ADP-ribosylation factor guanine nucleotide-exchange factor 1          | ARFGEF1       | 0.5                | 0.7                 | 0.4                  | 0.5                 |
| activator of heat shock 90kDa protein ATPase homolog 1 (yeast)        | AHSA1         | 0.7                | 0.8                 | 0.4                  | 0.8                 |
| <b>aldo-keto reductase family 1, member C3</b>                        | AKR1C3        | <b>1.1</b>         | <b>2.6</b>          | <b>2.7</b>           | <b>3.5</b>          |
| ankyrin repeat and MYND domain containing 2                           | ANKMY2        | 0.6                | 0.5                 | 0.9                  | 0.6                 |
| <b>AIF-like mitochondrion-associated inducer of death</b>             | AMID          | <b>1.6</b>         | <b>2.2</b>          | <b>1.3</b>           | <b>1.2</b>          |
| ASF1 anti-silencing function 1 homolog A (S. cerevisiae)              | ASF1A         | 0.4                | <b>1.8</b>          | <b>1.2</b>           | <b>1.3</b>          |
| ASF1 anti-silencing function 1 homolog A (S. cerevisiae)              | ASF1A         | 0.5                | <b>2.0</b>          | 0.9                  | <b>1.3</b>          |
| asparagine-linked glycosylation 10 homolog (yeast)                    | ALG10         | 0.4                | 0.8                 | 0.9                  | 0.7                 |
| ATPase, Ca <sup>++</sup> transporting, type 2C, member 1              | ATP2C1        | 0.8                | <b>1.1</b>          | 0.9                  | <b>1.1</b>          |
| ATPase, Ca <sup>++</sup> transporting, type 2C, member 1              | ATP2C1        | 0.7                | <b>1.2</b>          | 0.9                  | 0.5                 |
| ATPase, Ca <sup>++</sup> transporting, type 2C, member 1              | ATP2C1        | 0.4                | <b>1.3</b>          | 0.4                  | 0.7                 |
| ATPase, Ca <sup>++</sup> transporting, type 2C, member 1              | ATP2C1        | 0.6                | 0.7                 | 0.5                  | 0.7                 |
| ATPase, H <sup>+</sup> transporting, lysosomal 70kDa, V1 subunit A    | ATP6V1A       | 0.6                | <b>1.2</b>          | 0.5                  | 0.9                 |
| ATPase, H <sup>+</sup> transporting, lysosomal 70kDa, V1 subunit A    | ATP6V1A       | 0.5                | <b>1.0</b>          | 0.4                  | 0.8                 |
| ATPase, H <sup>+</sup> transporting, lysosomal V0 subunit a isoform 1 | ATP6V0A1      | 0.4                | <b>1.2</b>          | <b>1.0</b>           | <b>1.3</b>          |
| ATPase, H <sup>+</sup> transporting, lysosomal V0 subunit a isoform 1 | ATP6V0A1      | 0.4                | <b>1.0</b>          | <b>1.0</b>           | <b>1.2</b>          |
| ATP-binding cassette, sub-family C (CFTR/MRP), member 5               | ABCC5         | 0.5                | <b>1.4</b>          | 0.3                  | 0.7                 |
| ATP-binding cassette, sub-family G (WHITE), member 1                  | ABCG1         | <b>1.2</b>         | <b>1.8</b>          | 0.4                  | 0.9                 |
| BCL2-associated athanogene 2                                          | BAG2          | 0.7                | 0.9                 | 0.5                  | 0.7                 |
| <b>BCL2-associated athanogene 3</b>                                   | BAG3          | <b>2.8</b>         | <b>1.3</b>          | <b>1.9</b>           | <b>3.1</b>          |
| biogenesis of lysosome-related organelles complex-1, subunit 2        | BLOC1S2       | 0.3                | <b>1.4</b>          | <b>1.0</b>           | <b>1.5</b>          |
| breast carcinoma amplified sequence 2                                 | BCAS2         | 0.6                | 0.5                 | 0.7                  | 0.8                 |
| BTB and CNC homology 1, basic leucine zipper transcription factor 1   | BACH1         | 0.5                | <b>1.6</b>          | 0.8                  | <b>2.0</b>          |
| BTB and CNC homology 1, basic leucine zipper transcription factor 1   | BACH1         | 0.6                | <b>1.4</b>          | 0.7                  | <b>1.8</b>          |
| CCAAT/enhancer binding protein (C/EBP),                               | CEBPG         | 0.6                | 0.8                 | <b>1.2</b>           | <b>1.3</b>          |

|                                                                       |           |            |            |            |            |
|-----------------------------------------------------------------------|-----------|------------|------------|------------|------------|
| gamma                                                                 |           |            |            |            |            |
| CCAAT/enhancer binding protein (C/EBP),<br>gamma                      | CEBPG     | 0.6        | 0.4        | <b>1.1</b> | <b>1.2</b> |
| CDK2-associated protein 1                                             | CDK2AP1   | 0.4        | <b>1.1</b> | 0.3        | 0.6        |
| CDNA clone IMAGE:30349460, partial cds                                |           | <b>1.0</b> | <b>1.1</b> | 0.8        | <b>1.5</b> |
| CDNA FLJ41270 fis, clone BRAMY2036387                                 |           | 0.8        | <b>1.6</b> | 0.9        | <b>2.1</b> |
| CDNA: FLJ22822 fis, clone KAIA3968                                    |           | 0.5        | 0.6        | 0.3        | 0.6        |
| cell cycle progression 1                                              | CCPG1     | 0.9        | 0.8        | <b>1.4</b> | <b>1.9</b> |
| cell cycle progression 1                                              | CCPG1     | 0.5        | 0.5        | <b>1.5</b> | <b>1.6</b> |
| cell cycle progression 1                                              | CCPG1     | 0.5        | 0.6        | <b>1.3</b> | <b>1.6</b> |
| chondroitin sulfate glucuronyltransferase                             | CSGlcA-T  | 0.8        | <b>1.4</b> | 0.7        | <b>1.0</b> |
| chondroitin sulfate glucuronyltransferase                             | CSGlcA-T  | 0.8        | <b>1.2</b> | 0.6        | 0.8        |
| chromosome 1 open reading frame 24                                    | C1orf24   | 0.5        | 0.8        | <b>1.5</b> | <b>1.8</b> |
| chromosome 10 open reading frame 45                                   | C10orf45  | <b>1.0</b> | 0.4        | 0.8        | <b>1.7</b> |
| chromosome 10 open reading frame 45                                   | C10orf45  | <b>1.0</b> | 0.3        | 0.7        | <b>1.8</b> |
| chromosome 14 open reading frame 11                                   | C14orf11  | 0.3        | 0.7        | 0.8        | 0.7        |
| <b>Chromosome 16 open reading frame 28</b>                            | C16orf28  | <b>1.3</b> | <b>1.5</b> | <b>1.4</b> | <b>1.0</b> |
| <b>chromosome 20 open reading frame 139</b>                           | C20orf139 | <b>1.7</b> | <b>2.6</b> | <b>1.2</b> | <b>2.6</b> |
| chromosome 20 open reading frame 24                                   | C20orf24  | 0.3        | 0.9        | 0.4        | 0.3        |
| chromosome 5 open reading frame 5                                     | C5orf5    | 0.8        | 0.9        | 0.8        | <b>1.5</b> |
| chromosome 6 open reading frame 133                                   | C6orf133  | 0.8        | 0.8        | 0.4        | 0.7        |
| chromosome 6 open reading frame 133                                   | C6orf133  | 0.7        | 0.7        | 0.4        | 0.9        |
| chromosome 6 open reading frame 166                                   | C6orf166  | 0.5        | 0.4        | 0.4        | 0.7        |
| chromosome 9 open reading frame 55                                    | C9orf55   | 0.4        | 0.4        | 0.5        | 0.6        |
| Chromosome X open reading frame 39                                    | CXorf39   | 0.4        | 0.7        | 0.6        | 0.5        |
| claudin 12                                                            | CLDN12    | 0.4        | 0.8        | 0.9        | 0.7        |
| Homo sapiens cDNA, 5 end /clone=IMAGE-<br>163624                      |           | 0.6        | <b>1.4</b> | <b>1.2</b> | <b>1.6</b> |
| clusterin (complement lysis inhibitor, SP-40,40,<br>apolipoprotein J) | CLU       | 0.4        | <b>1.5</b> | <b>1.2</b> | <b>2.2</b> |
| c-Mpl binding protein                                                 | LOC113251 | 0.6        | <b>1.3</b> | 0.5        | 0.5        |
| coagulation factor II (thrombin) receptor                             | F2R       | 0.5        | 0.8        | 0.4        | <b>1.6</b> |
| COBL-like 1                                                           | COBLL1    | 0.9        | 0.6        | 0.6        | <b>1.3</b> |
| COBL-like 1                                                           | COBLL1    | 0.6        | 0.9        | 0.5        | <b>1.2</b> |
| collaborates/cooperates with ARF protein                              | CARF      | 0.5        | 0.6        | 0.4        | 0.4        |
| <b>CLONE=IMAGE:856163 /UG=Hs.315562 ESTs</b>                          |           | <b>1.7</b> | <b>3.1</b> | <b>2.3</b> | <b>2.9</b> |
| CLONE=IMAGE:1676516 /UG=Hs.42911                                      |           | 0.3        | 0.9        | 0.5        | 0.4        |
| CLONE=IMAGE:2330615 /UG=Hs.116586 ESTs                                |           | 0.3        | 0.5        | 0.6        | 0.5        |
| CLONE=IMAGE:2508169 /UG=Hs.134791 ESTs                                |           | 0.5        | <b>1.3</b> | 0.9        | <b>1.2</b> |
| Hs.183861 Homo sapiens cDNA FLJ20042 fis,<br>clone COL00424           |           | 0.4        | 0.5        | <b>1.0</b> | 0.9        |
| Hs.195822 Homo sapiens cDNA: FLJ21464 fis,<br>clone COL04768          |           | 0.7        | <b>1.3</b> | 0.6        | <b>1.0</b> |
| <b>Human DNA sequence from clone RP5-1174N9</b>                       |           | <b>4.2</b> | <b>3.2</b> | <b>3.7</b> | <b>2.0</b> |
| <b>Hs.94 DnaJ (Hsp40) homolog, subfamily A,<br/>member 1</b>          |           | <b>1.1</b> | <b>1.0</b> | <b>1.2</b> | <b>1.4</b> |
| <b>CLONE=CS0DF022YM06 (3 prime)</b><br><b>/UG=Hs.201615 ESTs</b>      |           | <b>2.0</b> | <b>1.6</b> | <b>1.9</b> | <b>2.3</b> |
| CLONE=IMAGE:2815110 /UG=Hs.122113 ESTs                                |           | 0.3        | 0.4        | 0.8        | 0.7        |
| CLONE=IMAGE:2727178 /UG=Hs.252782 ESTs                                |           | 0.7        | <b>1.7</b> | <b>1.5</b> | <b>1.6</b> |
| DB_XREF=est:EST384381 /UG=Hs.292998 ESTs                              |           | 0.5        | 0.5        | 0.6        | <b>1.0</b> |
| CLONE=IMAGE:3084358 /UG=Hs.77496                                      |           | 0.4        | <b>1.7</b> | <b>1.1</b> | <b>1.9</b> |
| CLONE=IMAGE:4347163 /UG=Hs.23248                                      |           | 0.5        | <b>1.2</b> | 0.7        | 0.4        |

|                                                                |               |            |            |            |            |
|----------------------------------------------------------------|---------------|------------|------------|------------|------------|
| CLONE=IMAGE:4346922 /UG=Hs.278614                              |               | 0.4        | 0.3        | 0.5        | 0.8        |
| CLONE=IMAGE:265528 /UG=Hs.155218                               |               | 0.5        | <b>1.2</b> | 0.4        | <b>1.0</b> |
| <b>Hs.118786 metallothionein 2A</b>                            |               | <b>6.0</b> | <b>6.4</b> | <b>3.4</b> | <b>6.2</b> |
| <b>/FL=gb:NM_005953.1</b>                                      |               |            |            |            |            |
| <b>cystathionase (cystathionine gamma-lyase)</b>               | CTH           | <b>2.0</b> | <b>1.0</b> | <b>2.4</b> | <b>1.6</b> |
| CHORD-containing, zinc binding protein 1                       | CHORDC1       | 0.9        | <b>1.0</b> | 0.7        | 0.6        |
| cysteinyl-tRNA synthetase                                      | CARS          | 0.6        | 0.3        | 0.9        | <b>1.1</b> |
| cytochrome P450, family 2, subfamily R, polypeptide 1          | CYP2R1        | 0.6        | 0.4        | 0.7        | 0.8        |
| cytoplasmic linker associated protein 1                        | CLASP1        | 0.5        | 0.6        | 0.6        | 0.6        |
| death effector domain containing 2                             | DEDD2         | <b>1.2</b> | 0.7        | <b>1.1</b> | <b>1.4</b> |
| dihydrolipoamide dehydrogenase                                 | DLD           | 0.3        | 0.5        | 0.4        | 0.5        |
| DKFZP564G2022 protein                                          | DKFZP564G2022 | 0.4        | 0.4        | 0.3        | 0.6        |
| DnaJ (Hsp40) homolog, subfamily A, member 1                    | DNAJA1        | <b>1.0</b> | <b>1.0</b> | 0.9        | <b>1.2</b> |
| <b>DnaJ (Hsp40) homolog, subfamily B, member 1</b>             | DNAJB1        | <b>1.9</b> | <b>1.3</b> | <b>1.4</b> | <b>1.9</b> |
| <b>DnaJ (Hsp40) homolog, subfamily B, member 1</b>             | DNAJB1        | <b>1.7</b> | <b>1.1</b> | <b>1.5</b> | <b>1.8</b> |
| <b>DnaJ (Hsp40) homolog, subfamily B, member 4</b>             | DNAJB4        | <b>2.3</b> | <b>1.6</b> | <b>1.6</b> | <b>1.7</b> |
| <b>DnaJ (Hsp40) homolog, subfamily B, member 4</b>             | DNAJB4        | <b>2.0</b> | <b>1.5</b> | <b>1.6</b> | <b>1.8</b> |
| DnaJ (Hsp40) homolog, subfamily B, member 6                    | DNAJB6        | <b>1.1</b> | 0.9        | <b>1.2</b> | <b>1.1</b> |
| DnaJ (Hsp40) homolog, subfamily B, member 6                    | DNAJB6        | 0.9        | 0.6        | 0.7        | <b>1.1</b> |
| DnaJ (Hsp40) homolog, subfamily B, member 9                    | DNAJB9        | 0.4        | 0.5        | 0.5        | 0.5        |
| DnaJ (Hsp40) homolog, subfamily B, member 9                    | DNAJB9        | 0.3        | 0.4        | 0.5        | 0.5        |
| dual specificity phosphatase 12                                | DUSP12        | 0.7        | 0.4        | 0.5        | 0.5        |
| dynactin 4 (p62)                                               | DCTN4         | 0.6        | <b>1.1</b> | 0.9        | <b>1.3</b> |
| echinoderm microtubule associated protein like 5               | EML5          | 0.6        | <b>1.1</b> | <b>1.2</b> | <b>1.3</b> |
| eukaryotic translation initiation factor 4E binding protein 1  | EIF4EBP1      | <b>1.2</b> | 0.4        | 0.6        | <b>1.3</b> |
| eukaryotic translation initiation factor 5                     | EIF5          | 0.4        | <b>1.2</b> | 0.8        | 0.6        |
| eukaryotic translation initiation factor 5                     | EIF5          | 0.4        | <b>1.1</b> | 0.9        | 0.6        |
| eukaryotic translation initiation factor 5                     | EIF5          | 0.3        | 0.8        | 0.8        | 0.6        |
| eukaryotic translation initiation factor 5                     | EIF5          | 0.3        | 0.7        | 0.8        | 0.7        |
| Exportin, tRNA (nuclear export receptor for tRNAs)             | XPOT          | 0.7        | 0.6        | 0.5        | 0.4        |
| Fas (TNFRSF6)-associated via death domain                      | FADD          | 0.6        | 0.7        | 0.4        | 0.5        |
| F-box protein 30                                               | FBXO30        | 0.5        | <b>1.7</b> | <b>2.4</b> | <b>2.4</b> |
| <b>ferritin, heavy polypeptide 1</b>                           | FTH1          | <b>2.7</b> | <b>1.3</b> | <b>2.9</b> | <b>3.4</b> |
| ferritin, heavy polypeptide 1                                  | FTH1          | <b>1.1</b> | <b>1.4</b> | 0.9        | <b>1.5</b> |
| ferritin, heavy polypeptide pseudogene 1                       | FTHP1         | 0.7        | <b>1.1</b> | 0.3        | 0.9        |
| ferrochelatase (protoporphyrin)                                | FECH          | 0.5        | 0.4        | 0.9        | <b>1.8</b> |
| forkhead box K1                                                | FOXK1         | 0.6        | <b>1.5</b> | 0.9        | <b>2.1</b> |
| G protein-coupled receptor 89                                  | GPR89         | 0.5        | 0.9        | 0.9        | <b>1.1</b> |
| G protein-coupled receptor 89                                  | GPR89         | 0.5        | 0.8        | 0.6        | 0.9        |
| G protein-coupled receptor 89                                  | GPR89         | 0.6        | 0.7        | 0.6        | 0.8        |
| G protein-coupled receptor 89                                  | GPR89         | 0.5        | 0.6        | 0.8        | 0.7        |
| GA binding protein transcription factor, beta subunit 2, 47kDa | GABPB2        | 0.5        | <b>1.0</b> | 0.6        | 0.6        |
| <b>GABA(A) receptor-associated protein like 1</b>              | GABARAPL1     | <b>1.3</b> | <b>2.8</b> | <b>5.4</b> | <b>3.4</b> |
| galactosidase, alpha                                           | GLA           | <b>2.1</b> | <b>2.2</b> | 0.5        | <b>1.2</b> |
| <b>Hs.8765 RNA helicase-related protein</b>                    |               | <b>2.9</b> | <b>3.8</b> | <b>2.8</b> | <b>3.0</b> |
| <b>/FL=gb:AF078844.1</b>                                       |               |            |            |            |            |
| <b>Hs.326774 Homo sapiens metallothionein 1H-</b>              |               | <b>6.2</b> | <b>4.7</b> | <b>2.6</b> | <b>4.0</b> |

|                                                          |                |            |            |            |            |
|----------------------------------------------------------|----------------|------------|------------|------------|------------|
| <b>like</b>                                              |                |            |            |            |            |
| Hs.12102 /LL=8724 /UG_GENE=SNX3                          |                | 0.4        | 0.8        | 0.7        | 0.9        |
| CLONE=IMAGE:3071180 /TID=Hs2.349076.1                    |                | 0.5        | 0.8        | <b>1.3</b> | <b>1.5</b> |
| CLONE=IMAGE:5392477 /TID=Hs2.401218.1                    |                | 0.5        | 0.9        | 0.9        | <b>1.2</b> |
| general transcription factor IIIC, polypeptide 3, 102kDa | GTF3C3         | 0.9        | 0.4        | 0.9        | 0.7        |
| glucosidase, beta; acid (includes glucosylceramidase)    | GBA /// GBAP   | 0.5        | 0.9        | 0.4        | 0.7        |
| glutamate-cysteine ligase, catalytic subunit             | GCLC           | 0.6        | <b>1.3</b> | 0.9        | <b>1.1</b> |
| glutamate-cysteine ligase, catalytic subunit             | GCLC           | 0.7        | <b>1.4</b> | 0.9        | 0.9        |
| <b>glutamate-cysteine ligase, modifier subunit</b>       | GCLM           | <b>1.6</b> | <b>3.0</b> | <b>2.3</b> | <b>2.6</b> |
| <b>glutamate-cysteine ligase, modifier subunit</b>       | GCLM           | <b>1.4</b> | <b>3.2</b> | <b>2.0</b> | <b>2.5</b> |
| glutaredoxin (thioltransferase)                          | GLRX           | 0.6        | <b>1.2</b> | 0.8        | <b>1.2</b> |
| glutaredoxin 2                                           | GLRX2          | 0.4        | <b>1.0</b> | 0.4        | 0.4        |
| growth hormone inducible transmembrane protein           | GHITM          | 0.6        | 0.7        | 0.5        | 0.6        |
| <b>heat shock 105kDa/110kDa protein 1</b>                | HSPH1          | <b>1.9</b> | <b>1.7</b> | <b>1.4</b> | <b>1.9</b> |
| <b>heat shock 105kDa/110kDa protein 1</b>                | HSPH1          | <b>1.6</b> | <b>1.4</b> | <b>1.1</b> | <b>1.5</b> |
| <b>heat shock 27kDa protein 1</b>                        | HSPB1          | <b>1.4</b> | <b>3.3</b> | <b>1.0</b> | <b>1.8</b> |
| <b>heat shock 70kDa protein 1A /1B</b>                   | HSPA1A /1B     | <b>5.0</b> | <b>5.0</b> | <b>4.3</b> | <b>5.1</b> |
| <b>heat shock 70kDa protein 1B</b>                       | HSPA1B         | <b>3.6</b> | <b>3.2</b> | <b>2.9</b> | <b>3.8</b> |
| heat shock 70kDa protein 4                               | HSPA4          | 0.8        | 0.6        | 0.4        | <b>1.0</b> |
| heat shock 70kDa protein 4                               | HSPA4          | 0.9        | 0.5        | 0.5        | 0.8        |
| heat shock 70kDa protein 4                               | HSPA4          | 0.8        | 0.6        | 0.5        | 0.6        |
| <b>heat shock 70kDa protein 6 (HSP70B')</b>              | HSPA6          | <b>3.9</b> | <b>3.9</b> | <b>3.2</b> | <b>5.3</b> |
| <b>heat shock 70kDa protein 6 (HSP70B')</b>              | HSPA6          | <b>2.4</b> | <b>1.3</b> | <b>2.1</b> | <b>3.7</b> |
| heat shock 90kDa protein 1, alpha                        | HSPCA          | 0.4        | <b>1.1</b> | 0.4        | 0.4        |
| heat shock 90kDa protein 1, alpha                        | HSPCA          | 0.3        | <b>1.2</b> | 0.3        | 0.3        |
| heat shock 90kDa protein 1, alpha                        | HSPCA          | 0.3        | 0.7        | 0.2        | 0.3        |
| heat shock 90kDa protein 1, beta                         | HSPCB          | 0.3        | 0.5        | 0.3        | 0.3        |
| heat shock protein (hsp110 family)                       | APG-1          | <b>1.0</b> | 0.4        | <b>1.3</b> | <b>1.0</b> |
| <b>heme oxygenase (decycling) 1</b>                      | HMOX1          | <b>3.8</b> | <b>6.0</b> | <b>3.1</b> | <b>5.6</b> |
| HIV-1 Tat interacting protein, 60kDa                     | HTATIP         | 0.6        | 0.4        | 0.3        | 0.8        |
| HIV-1 Tat interacting protein, 60kDa                     | HTATIP         | 0.4        | 0.6        | 0.4        | 0.7        |
| HMG-box transcription factor 1                           | HBP1           | 0.6        | 0.9        | 0.8        | <b>1.2</b> |
| Hypothetical LOC403340                                   | MGC70870       | 0.7        | 0.2        | <b>1.3</b> | 0.6        |
| hypothetical protein DKFZp564O0523                       | DKFZP564 O0523 | 0.6        | 0.6        | 0.5        | 0.5        |
| hypothetical protein FLJ10276                            | FLJ10276       | 0.3        | <b>1.0</b> | 0.9        | <b>1.6</b> |
| hypothetical protein FLJ20097                            | FLJ20097       | 0.4        | 0.9        | 0.5        | <b>1.0</b> |
| hypothetical protein FLJ20489                            | FLJ20489       | 0.6        | <b>1.6</b> | <b>1.5</b> | <b>2.2</b> |
| <b>hypothetical protein FLJ20716</b>                     | FLJ20716       | <b>1.6</b> | <b>1.8</b> | <b>1.1</b> | <b>1.3</b> |
| hypothetical protein FLJ31413                            | FLJ31413       | 0.3        | 0.8        | 0.7        | <b>1.3</b> |
| Hypothetical protein FLJ32421                            | FLJ32421       | 0.4        | 0.3        | 0.3        | 0.5        |
| <b>hypothetical protein FLJ36701</b>                     | FLJ36701       | <b>4.1</b> | <b>5.6</b> | <b>4.3</b> | <b>4.5</b> |
| hypothetical protein HSPC138                             | HSPC138        | <b>1.0</b> | 0.6        | 0.7        | 0.5        |
| hypothetical protein HSPC138                             | HSPC138        | 0.8        | 0.5        | 0.7        | 0.5        |
| hypothetical protein LOC134145                           | LOC134145      | 0.9        | <b>1.5</b> | 0.7        | <b>1.1</b> |
| hypothetical protein LOC339924                           | LOC339924      | 0.4        | 0.4        | 0.7        | <b>1.3</b> |
| <b>hypothetical protein LOC90637</b>                     | LOC90637       | <b>1.9</b> | <b>2.0</b> | <b>2.1</b> | <b>2.5</b> |
| <b>hypothetical protein MGC11324</b>                     | MGC11324       | <b>2.8</b> | <b>3.2</b> | <b>1.7</b> | <b>4.3</b> |
| hypothetical protein MGC2747                             | MGC2747        | 0.3        | 0.5        | 0.4        | 0.7        |
| hypothetical protein MGC8721                             | MGC8721        | 0.3        | <b>1.0</b> | 0.8        | 0.9        |

|                                                                 |               |            |            |            |            |
|-----------------------------------------------------------------|---------------|------------|------------|------------|------------|
| inhibitor of growth family, member 3                            | ING3          | 0.8        | 0.4        | <b>1.0</b> | 0.9        |
| inhibitor of growth family, member 3                            | ING3          | 0.7        | 0.5        | 0.6        | 0.9        |
| interferon-related developmental regulator 1                    | IFRD1         | 0.9        | 0.2        | 0.9        | <b>1.3</b> |
| interleukin 10 receptor, alpha                                  | IL10RA        | 0.8        | <b>1.3</b> | 0.4        | <b>1.7</b> |
| intracellular memb.-assoc. Ca2+-indep. phospholipase A2 gamma   | IPLA2(GA MMA) | 0.3        | 0.9        | <b>1.1</b> | <b>1.2</b> |
| KIAA0063 gene product                                           | KIAA0063      | <b>1.1</b> | 0.8        | 0.6        | <b>1.4</b> |
| KIAA0232 gene product                                           | KIAA0232      | 0.5        | 0.7        | 0.7        | <b>1.3</b> |
| <b>KIAA0469 gene product</b>                                    | KIAA0469      | <b>2.0</b> | <b>2.6</b> | <b>1.0</b> | <b>1.7</b> |
| kinesin family member 21A                                       | KIF21A        | 0.6        | <b>1.3</b> | 0.5        | <b>1.3</b> |
| LanC lantibiotic synthetase component C-like 2 (bacterial)      | LANCL2        | <b>1.0</b> | <b>1.2</b> | 0.9        | <b>1.2</b> |
| lectin, galactoside-binding, soluble, 8 (galectin 8)            | LGALS8        | 0.6        | <b>2.1</b> | <b>1.4</b> | <b>1.8</b> |
| lectin, galactoside-binding, soluble, 8 (galectin 8)            | LGALS8        | 0.7        | <b>1.5</b> | <b>1.7</b> | <b>1.8</b> |
| leupaxin                                                        | LPXN          | <b>1.3</b> | <b>1.1</b> | 0.3        | 0.5        |
| LIM and senescent cell antigen-like domains 1                   | LIMS1         | 0.6        | <b>1.0</b> | 0.3        | 0.9        |
| limkain b1                                                      | LKAP          | 0.8        | 0.6        | 0.8        | 0.6        |
| lipopolysaccharide-induced TNF factor                           | LITAF         | 0.4        | 0.4        | 0.4        | <b>1.9</b> |
| lipopolysaccharide-induced TNF factor                           | LITAF         | 0.3        | 0.3        | 0.3        | <b>1.7</b> |
| Malic enzyme 1, NADP(+)-dependent, cytosolic                    | ME1           | <b>1.8</b> | <b>1.8</b> | 0.9        | <b>2.1</b> |
| malic enzyme 1, NADP(+)-dependent, cytosolic                    | ME1           | <b>1.3</b> | <b>1.5</b> | 0.8        | <b>2.1</b> |
| melanoma associated antigen (mutated) 1                         | MUM1          | 0.8        | 0.4        | <b>1.1</b> | <b>1.4</b> |
| matrix metalloproteinase cytoplasmic tail binding protein-1     | MTCBP-1       | 0.5        | 0.5        | 0.5        | 0.5        |
| <b>metallothionein 1E (functional)</b>                          | MT1E          | <b>7.6</b> | <b>4.5</b> | <b>4.2</b> | <b>3.6</b> |
| <b>metallothionein 1F (functional)</b>                          | MT1F          | <b>9.5</b> | <b>8.5</b> | <b>4.0</b> | <b>8.8</b> |
| <b>metallothionein 1F (functional)</b>                          | MT1F          | <b>5.1</b> | <b>4.9</b> | <b>3.4</b> | <b>4.2</b> |
| <b>metallothionein 1G</b>                                       | MT1G          | <b>5.5</b> | <b>5.8</b> | <b>3.6</b> | <b>3.5</b> |
| <b>metallothionein 1H</b>                                       | MT1H          | <b>7.8</b> | <b>7.5</b> | <b>3.7</b> | <b>4.9</b> |
| <b>metallothionein 1X</b>                                       | MT1X          | <b>7.5</b> | <b>9.3</b> | <b>3.5</b> | <b>5.5</b> |
| <b>metallothionein 1X</b>                                       | MT1X          | <b>7.0</b> | <b>6.6</b> | <b>3.4</b> | <b>5.4</b> |
| <b>metallothionein 2A</b>                                       | MT2A          | <b>6.0</b> | <b>6.4</b> | <b>3.4</b> | <b>6.2</b> |
| microtubule-associated protein 1 light chain 3 beta             | MAP1LC3B      | 0.9        | <b>1.1</b> | 0.8        | <b>1.3</b> |
| mitochondrial carrier homolog 1 (C. elegans)                    | MTCH1         | 0.3        | 0.2        | 0.5        | 0.6        |
| mitochondrial ribosomal protein L18                             | MRPL18        | <b>1.0</b> | <b>1.1</b> | 0.7        | <b>1.1</b> |
| Mitochondrial ribosomal protein S6                              | MRPS6         | <b>1.4</b> | <b>1.0</b> | 0.4        | <b>1.2</b> |
| mitochondrial ribosomal protein S6                              | MRPS6         | 0.6        | 0.8        | 0.4        | <b>1.1</b> |
| mitogen-activated protein kinase kinase 1 interacting protein 1 | MAP2K1IP1     | 0.3        | 0.6        | 0.6        | 0.7        |
| motile sperm domain containing 1                                | MOSPD1        | 0.4        | 0.4        | 0.9        | 0.6        |
| muscleblind-like 2 (Drosophila)                                 | MBNL2         | <b>1.3</b> | 0.8        | <b>1.5</b> | <b>1.7</b> |
| muscleblind-like 2 (Drosophila)                                 | MBNL2         | <b>1.3</b> | 0.9        | <b>1.2</b> | <b>1.4</b> |
| muscleblind-like 2 (Drosophila)                                 | MBNL2         | <b>1.2</b> | 0.5        | 0.6        | <b>1.0</b> |
| <b>NACHT, leucine rich repeat and PYD containing 7</b>          | NALP7         | <b>1.0</b> | <b>1.6</b> | <b>1.5</b> | <b>1.8</b> |
| <b>NAD(P)H dehydrogenase, quinone 1</b>                         | NQO1          | <b>1.4</b> | <b>5.5</b> | <b>1.9</b> | <b>2.8</b> |
| <b>NAD(P)H dehydrogenase, quinone 1</b>                         | NQO1          | <b>1.4</b> | <b>2.8</b> | <b>2.1</b> | <b>2.4</b> |
| <b>NAD(P)H dehydrogenase, quinone 1</b>                         | NQO1          | <b>1.2</b> | <b>3.3</b> | <b>1.4</b> | <b>2.2</b> |
| <b>NAD(P)H dehydrogenase, quinone 2</b>                         | NQO2          | <b>1.4</b> | <b>2.2</b> | <b>1.4</b> | <b>1.7</b> |
| Nijmegen breakage syndrome 1 (nibrin)                           | NBS1          | 0.7        | 0.6        | 0.4        | 0.5        |
| NSFL1 (p97) cofactor (p47)                                      | NSFL1C        | 0.3        | <b>1.1</b> | 0.4        | 0.7        |
| NTKL-binding protein 1                                          | FLJ11752      | 0.5        | 0.7        | 0.4        | 0.5        |
| nuclear transport factor 2-like export factor 2                 | NXT2          | 0.6        | 0.7        | 0.4        | <b>1.0</b> |

|                                                             |          |            |            |            |            |
|-------------------------------------------------------------|----------|------------|------------|------------|------------|
| nucleosome assembly protein 1-like 2                        | NAP1L2   | 0.8        | <b>2.1</b> | <b>1.7</b> | <b>1.4</b> |
| ornithine decarboxylase antizyme inhibitor                  | OAZIN    | 0.3        | 0.3        | 0.4        | 0.7        |
| oxysterol binding protein-like 3                            | OSBPL3   | 0.4        | <b>1.1</b> | 0.5        | <b>1.1</b> |
| pallidin homolog (mouse)                                    | PLDN     | 0.3        | 0.6        | 0.3        | 0.7        |
| pelota homolog (Drosophila)                                 | PELO     | 0.6        | <b>1.7</b> | 0.9        | <b>1.2</b> |
| peptidylprolyl isomerase D (cyclophilin D)                  | PPID     | 0.6        | 0.6        | 0.8        | 0.8        |
| peptidylprolyl isomerase D (cyclophilin D)                  | PPID     | 0.5        | 0.3        | 0.7        | 0.5        |
| Phosphate cytidylyltransferase 1, choline, alpha isoform    | PCYT1A   | 0.6        | <b>1.3</b> | <b>1.0</b> | <b>1.6</b> |
| phosphate cytidylyltransferase 1, choline, alpha isoform    | PCYT1A   | 0.6        | <b>1.1</b> | 0.8        | <b>1.5</b> |
| phosphatidylinositol glycan, class B                        | PIGB     | 0.6        | 0.8        | <b>1.4</b> | <b>1.3</b> |
| phosphatidylinositol glycan, class B                        | PIGB     | 0.5        | 0.5        | <b>1.3</b> | <b>1.3</b> |
| pirin (iron-binding nuclear protein)                        | PIR      | 0.9        | <b>2.2</b> | <b>1.3</b> | <b>1.2</b> |
| prion protein (p27-30)                                      | PRNP     | 0.5        | 0.3        | 0.8        | <b>1.3</b> |
| procollagen-proline, 2-oxoglutarate 4-dioxygenase           | P4HA2    | 0.6        | <b>1.4</b> | <b>1.6</b> | <b>1.9</b> |
| Proline rich Gla (G-carboxyglutamic acid) 4 (transmembrane) | PRRG4    | 0.5        | <b>1.0</b> | <b>1.0</b> | <b>1.7</b> |
| protease, serine, 16 (thymus)                               | PRSS16   | 0.8        | 0.5        | 0.9        | 0.9        |
| proteasome (prosome, macropain) 26S subunit, non-ATPase, 11 | PSMD11   | 0.5        | <b>1.1</b> | 0.4        | 0.8        |
| proteasome (prosome, macropain) 26S subunit, non-ATPase, 12 | PSMD12   | 0.4        | <b>1.5</b> | 0.5        | <b>1.0</b> |
| Proteasome (prosome, macropain) 26S subunit, non-ATPase, 14 | PSMD14   | 0.3        | <b>1.1</b> | 0.5        | 0.7        |
| protein kinase, cAMP-dependent, catalytic, beta             | PRKACB   | 0.5        | <b>1.3</b> | <b>1.2</b> | <b>2.1</b> |
| protein kinase, cAMP-dependent, catalytic, beta             | PRKACB   | 0.4        | <b>1.1</b> | <b>1.1</b> | <b>1.6</b> |
| protein x 013                                               | AD-020   | 0.7        | <b>1.0</b> | 0.7        | 0.6        |
| proteoglycan 1, secretory granule                           | PRG1     | 0.4        | 0.9        | 0.5        | 0.3        |
| PTD016 protein                                              | LOC51136 | 0.5        | <b>1.4</b> | 0.7        | <b>1.3</b> |
| purine-rich element binding protein B                       | PURB     | 0.4        | 0.7        | 0.4        | <b>1.0</b> |
| quinoid dihydropteridine reductase                          | QDPR     | 0.4        | 0.5        | 0.3        | 0.3        |
| rabaptin, RAB GTPase binding effector protein 2             | RABEP2   | 0.5        | 0.9        | 0.8        | 0.6        |
| RAN binding protein 2                                       | RANBP2   | 0.6        | 0.8        | 0.5        | 0.4        |
| reproduction 8                                              | D8S2298E | <b>1.1</b> | <b>1.1</b> | 0.7        | <b>1.1</b> |
| Retinoblastoma-associated factor 600                        | RBAF600  | 0.6        | <b>1.3</b> | 0.6        | <b>1.1</b> |
| rhomboid, veinlet-like 7 (Drosophila)                       | RHBDL7   | 0.8        | 0.8        | 0.9        | 0.6        |
| rhomboid, veinlet-like 7 (Drosophila)                       | RHBDL7   | 0.8        | 0.7        | 0.7        | 0.6        |
| ribonuclease L (2',5'-oligoadenylate synthetase-dependent)  | RNASEL   | 0.8        | 0.9        | <b>1.7</b> | <b>1.5</b> |
| ribonuclease P 40kDa subunit                                | RPP40    | 0.8        | <b>1.1</b> | 0.5        | 0.8        |
| ring finger protein 14                                      | RNF14    | 0.4        | 0.6        | 0.5        | 0.8        |
| ring finger protein 14                                      | RNF14    | 0.5        | 0.5        | 0.5        | 0.5        |
| RNA binding motif (RNP1, RRM) protein 3                     | RBM3     | 0.8        | 0.8        | <b>1.1</b> | <b>1.4</b> |
| RNA binding motif protein 23                                | RBM23    | 0.7        | 0.7        | 0.4        | 0.4        |
| RNA binding motif protein 30                                | RBM30    | 0.6        | <b>1.2</b> | 0.6        | <b>1.0</b> |
| selenoprotein K                                             | SELK     | 0.6        | 0.3        | 0.4        | 0.4        |
| <b>sequestosome 1</b>                                       | SQSTM1   | <b>2.1</b> | <b>4.7</b> | <b>2.1</b> | <b>5.1</b> |
| <b>sequestosome 1</b>                                       | SQSTM1   | <b>1.1</b> | <b>2.4</b> | <b>1.8</b> | <b>2.7</b> |
| <b>Ser/Thr-like kinase</b>                                  | MGC4796  | <b>1.2</b> | <b>1.2</b> | <b>1.0</b> | <b>1.5</b> |
| Serine hydroxymethyltransferase 1 (soluble)                 | SHMT1    | 0.6        | <b>1.0</b> | 0.5        | <b>1.0</b> |
| Serine hydroxymethyltransferase 1 (soluble)                 | SHMT1    | 0.6        | 0.7        | 0.6        | 0.9        |
| serologically defined colon cancer antigen 33               | SDCCAG33 | 0.9        | 0.8        | <b>1.0</b> | <b>1.1</b> |

|                                                                  |          |            |            |            |            |
|------------------------------------------------------------------|----------|------------|------------|------------|------------|
| serologically defined colon cancer antigen 33                    | SDCCAG33 | <b>1.0</b> | 0.6        | <b>1.0</b> | <b>1.1</b> |
| sestrin 2                                                        | SESN2    | <b>1.5</b> | 0.4        | <b>2.3</b> | <b>3.2</b> |
| SGT1, suppressor of G2 allele of SKP1 (S. cerevisiae)            | SUGT1    | 0.5        | 0.2        | 0.6        | 0.7        |
| SHC (Src homology 2 domain containing) transforming protein 1    | SHC1     | 0.4        | 0.5        | 0.5        | 0.5        |
| Siah-interacting protein                                         | SIP      | 0.7        | 0.6        | 0.4        | 0.8        |
| Siah-interacting protein                                         | SIP      | 0.6        | 0.6        | 0.3        | 0.5        |
| Siah-interacting protein /// Siah-interacting protein            | SIP      | 0.6        | 0.7        | 0.6        | 0.8        |
| Similar to CG14903-PA                                            |          | 0.5        | <b>1.1</b> | 0.6        | <b>1.0</b> |
| similar to F10G7.10.p                                            | KIAA2024 | 0.7        | <b>1.4</b> | 0.6        | 0.9        |
| similar to F10G7.10.p                                            | KIAA2024 | 0.6        | <b>1.3</b> | 0.7        | 0.7        |
| Similar to Hypothetical protein CBG13135                         |          | 0.7        | <b>1.4</b> | 0.6        | 0.8        |
| solute carrier family 3, member 2                                | SLC3A2   | <b>1.1</b> | 0.7        | 0.9        | <b>1.3</b> |
| <b>solute carrier family 30 (zinc transporter), member 1</b>     | SLC30A1  | <b>3.9</b> | <b>1.8</b> | <b>2.1</b> | <b>2.7</b> |
| <b>Solute carrier family 30 (zinc transporter), member 1</b>     | SLC30A1  | <b>3.3</b> | <b>1.1</b> | <b>2.4</b> | <b>2.2</b> |
| solute carrier family 38, member 6                               | SLC38A6  | 0.9        | <b>1.3</b> | 0.5        | <b>1.0</b> |
| solute carrier family 5 (inositol transporters), member 3        | SLC5A3   | <b>1.6</b> | <b>1.5</b> | 0.4        | <b>1.2</b> |
| solute carrier family 6, member 9                                | SLC6A9   | <b>1.3</b> | 0.6        | <b>1.7</b> | <b>2.3</b> |
| <b>solute carrier family 7, member 11</b>                        | SLC7A11  | <b>2.3</b> | <b>2.5</b> | <b>3.3</b> | <b>4.9</b> |
| <b>solute carrier family 7, member 11</b>                        | SLC7A11  | <b>2.2</b> | <b>2.4</b> | <b>2.9</b> | <b>4.3</b> |
| <b>solute carrier family 7, member 11</b>                        | SLC7A11  | <b>1.8</b> | <b>1.3</b> | <b>1.5</b> | <b>2.5</b> |
| sorting nexin 3                                                  | SNX3     | 0.4        | 0.8        | 0.6        | <b>1.1</b> |
| sorting nexin 3                                                  | SNX3     | 0.3        | 0.7        | 0.5        | 0.8        |
| <b>spermidine/spermine N1-acetyltransferase</b>                  | SAT      | <b>2.3</b> | <b>2.8</b> | <b>1.0</b> | <b>1.3</b> |
| spermidine/spermine N1-acetyltransferase                         | SAT      | <b>2.4</b> | <b>2.5</b> | 0.8        | <b>1.0</b> |
| spinster-like                                                    | SPINL    | 0.5        | 0.9        | 0.5        | 0.7        |
| stress 70 protein chaperone, microsome-associated, 60kDa         | STCH     | 0.4        | 0.4        | 0.4        | 0.9        |
| stress-induced-phosphoprotein 1 (Hsp70/Hsp90-organizing protein) | STIP1    | 0.7        | 0.8        | 0.4        | 0.9        |
| stress-induced-phosphoprotein 1 (Hsp70/Hsp90-organizing protein) | STIP1    | 0.7        | 0.8        | 0.4        | 0.8        |
| suppression of tumorigenicity 13 (Hsp70 interacting protein)     | ST13     | 0.5        | 0.6        | 0.6        | <b>1.0</b> |
| suppression of tumorigenicity 13 (Hsp70 interacting protein)     | ST13     | 0.5        | 0.8        | 0.4        | 0.8        |
| suppression of tumorigenicity 13 (Hsp70 interacting protein)     | ST13     | 0.3        | 0.7        | 0.4        | 0.6        |
| syntaxin 3A                                                      | STX3A    | 0.6        | <b>1.8</b> | 0.9        | <b>1.6</b> |
| syntaxin 3A                                                      | STX3A    | 0.8        | <b>1.2</b> | 0.6        | 0.8        |
| testis derived transcript (3 LIM domains)                        | TES      | 0.7        | 0.6        | <b>1.4</b> | <b>1.6</b> |
| testis derived transcript (3 LIM domains)                        | TES      | 0.7        | 0.4        | <b>1.1</b> | <b>1.2</b> |
| tetratricopeptide repeat domain 14                               | TTC14    | 0.6        | 0.6        | 0.6        | 0.5        |
| thioredoxin reductase 1                                          | TXNRD1   | 0.9        | <b>1.8</b> | 0.5        | <b>1.3</b> |
| THO complex 1                                                    | THOC1    | 0.3        | 0.8        | 0.6        | <b>1.0</b> |
| weakly similar to NP_079012.2 gasdermin domain containing 1      |          | 0.5        | 0.6        | 0.4        | 0.6        |
| transcription factor 8 (represses interleukin 2 expression)      | TCF8     | 0.5        | <b>2.1</b> | 0.5        | <b>1.2</b> |
| transducin (beta)-like 1X-linked                                 | TBL1X    | <b>1.2</b> | 0.4        | 0.6        | 0.9        |



|                                                                |         |            |            |            |            |
|----------------------------------------------------------------|---------|------------|------------|------------|------------|
| transducin (beta)-like 1X-linked                               | TBL1X   | <b>1.1</b> | 0.3        | 0.5        | <b>1.0</b> |
| tribbles homolog 3 (Drosophila)                                | TRIB3   | <b>1.6</b> | 0.8        | <b>1.4</b> | <b>2.1</b> |
| tribbles homolog 3 (Drosophila)                                | TRIB3   | <b>1.7</b> | 0.9        | 0.9        | <b>1.8</b> |
| trinucleotide repeat containing 6                              | TNRC6   | 0.4        | 0.7        | 0.6        | 0.3        |
| tryptophanyl-tRNA synthetase                                   | WARS    | 0.6        | 0.8        | 0.4        | 0.8        |
| TSPY-like 1                                                    | TSPYL1  | 0.6        | 0.5        | 0.3        | 0.6        |
| tumor differentially expressed 2                               | TDE2    | 0.4        | 0.3        | 0.5        | 0.9        |
| ubiquilin 1                                                    | UBQLN1  | 0.3        | 0.7        | 0.4        | 0.5        |
| Ubiquitin protein ligase E3 component n-recognin 1             | UBR1    | 0.4        | 0.6        | 0.5        | 0.8        |
| ubiquitin specific protease 14 (tRNA-guanine transglycosylase) | USP14   | 0.4        | 0.9        | 0.3        | 0.7        |
| ubiquitin specific protease 38                                 | USP38   | 0.4        | 0.9        | 0.6        | 0.5        |
| ubiquitin-conjugating enzyme E2B (RAD6 homolog)                | UBE2B   | 0.6        | 0.5        | 0.7        | <b>1.2</b> |
| ubiquitin-conjugating enzyme E2B (RAD6 homolog)                | UBE2B   | 0.4        | 0.3        | 0.5        | 0.8        |
| ubiquitin-conjugating enzyme E2B (RAD6 homolog)                | UBE2B   | 0.6        | 0.4        | 0.7        | <b>1.1</b> |
| UBX domain containing 2                                        | UBXD2   | 0.4        | 0.8        | 0.3        | 0.7        |
| upregulated in colorectal cancer gene 1                        | UCC1    | 0.4        | 0.9        | 0.7        | <b>1.3</b> |
| valosin-containing protein                                     | VCP     | 0.6        | 0.8        | 0.5        | 0.9        |
| valosin-containing protein                                     | VCP     | 0.4        | 0.8        | 0.4        | 0.7        |
| v-maf musculoaponeurotic fibrosarcoma oncogene homolog G       | MAFG    | 0.8        | <b>1.5</b> | 0.8        | <b>1.4</b> |
| WD repeat domain 1                                             | WDR1    | 0.3        | 0.6        | 0.6        | 0.9        |
| yippee-like 5 (Drosophila)                                     | YPEL5   | <b>1.0</b> | 0.7        | 0.9        | <b>1.5</b> |
| yippee-like 5 (Drosophila)                                     | YPEL5   | 0.7        | 0.6        | 0.6        | <b>1.7</b> |
| ZFP-36 for a zinc finger protein                               | HSZFP36 | 0.4        | <b>1.9</b> | <b>1.3</b> | <b>1.7</b> |
| zinc finger and BTB domain containing 1                        | ZBTB1   | 0.5        | <b>1.0</b> | 0.6        | 0.6        |
| zinc finger CCCH type, antiviral 1                             | ZC3HAV1 | 0.8        | 0.3        | 0.5        | 0.6        |
| zinc finger CCCH type, antiviral 1                             | ZC3HAV1 | 0.7        | 0.3        | 0.4        | 0.6        |
| zinc finger motif enhancer binding protein 2                   | Zep-2   | 0.6        | <b>1.2</b> | 0.4        | 0.9        |
| zinc finger protein 165                                        | ZNF165  | <b>1.0</b> | <b>1.5</b> | 0.5        | <b>1.5</b> |
| zinc finger protein 184 (Kruppel-like)                         | ZNF184  | 0.4        | 0.8        | <b>1.3</b> | <b>1.1</b> |
| zinc finger protein 267                                        | ZNF267  | <b>1.1</b> | <b>1.6</b> | 0.4        | 0.8        |
| zinc finger protein 295                                        | ZNF295  | 0.4        | 0.9        | 0.7        | <b>1.1</b> |
| zinc finger protein 3 (A8-51)                                  | ZNF3    | 0.5        | 0.5        | 0.5        | 0.5        |
| zinc finger protein 307                                        | ZNF307  | <b>1.0</b> | 0.5        | 0.7        | 0.7        |
| zinc finger protein 407                                        | ZNF407  | 0.8        | 0.8        | 0.3        | 0.7        |
| zinc finger protein 505                                        | ZNF505  | 0.4        | 0.8        | 0.7        | 0.4        |
| zinc finger protein 92 (HTF12)                                 | ZNF92   | 0.5        | <b>1.3</b> | 0.9        | 0.5        |
| zinc finger, A20 domain containing 2                           | ZA20D2  | 0.3        | 0.9        | 0.4        | 0.8        |
| zinc finger, A20 domain containing 2                           | ZA20D2  | 0.3        | 0.8        | 0.4        | 0.7        |
| Zinc finger, BED domain containing 3                           | ZBED3   | 0.9        | <b>1.9</b> | <b>2.6</b> | <b>1.5</b> |
| zinc finger, BED domain containing 3                           | ZBED3   | 0.9        | <b>1.1</b> | 0.8        | <b>1.4</b> |

**LogRatios for up-regulated genes at 24 h in all cell lines**

**Two-fold changes are in red bold**

| Gene Descriptor | Symbol | U266 | MM.1s | 8226/S | KMS11 |
|-----------------|--------|------|-------|--------|-------|
|-----------------|--------|------|-------|--------|-------|

|                                                                                                     |           | 24h        | 24h        | 24h        | 24h        |
|-----------------------------------------------------------------------------------------------------|-----------|------------|------------|------------|------------|
| 82-kD FMRP Interacting Protein                                                                      | 182-FIP   | 0.7        | 0.8        | 0.4        | 0.4        |
| acylphosphatase 2, muscle type                                                                      | ACYP2     | 0.9        | <b>1.5</b> | 0.9        | <b>1.3</b> |
| ADP-ribosylation factor-like 6 interacting protein                                                  | ARL6IP    | 0.4        | 0.3        | 0.4        | 0.8        |
| <b>aldo-keto reductase family 1, member C3</b>                                                      | AKR1C3    | <b>1.6</b> | <b>3.2</b> | <b>2.9</b> | <b>5.9</b> |
| annexin A2                                                                                          | ANXA2     | 0.2        | 0.5        | 0.6        | <b>1.4</b> |
| <b>AIF-like mitochondrion-associated inducer of death</b>                                           | AMID      | <b>1.8</b> | <b>1.9</b> | <b>1.0</b> | <b>1.1</b> |
| arachidonate 5-lipoxygenase-activating protein                                                      | ALOX5AP   | <b>1.7</b> | <b>1.1</b> | 0.5        | <b>1.7</b> |
| ASF1 anti-silencing function 1 homolog A (S. cerevisiae)                                            | ASF1A     | <b>1.0</b> | <b>1.6</b> | 0.6        | 0.9        |
| ASF1 anti-silencing function 1 homolog A (S. cerevisiae)                                            | ASF1A     | 0.8        | <b>1.5</b> | 0.5        | 0.7        |
| biliverdin reductase B (flavin reductase (NADPH))                                                   | BLVRB     | <b>1.4</b> | <b>2.2</b> | 0.7        | <b>2.9</b> |
| branched chain aminotransferase 1, cytosolic                                                        | BCAT1     | <b>1.0</b> | <b>1.3</b> | 0.8        | <b>1.7</b> |
| calpain 7                                                                                           | CAPN7     | 0.5        | 0.3        | 0.5        | 0.3        |
| caspase 8, apoptosis-related cysteine protease                                                      | CASP8     | 0.5        | 0.5        | 0.6        | 0.9        |
| CCAAT/enhancer binding protein (C/EBP), gamma                                                       | CEBPG     | 0.5        | 0.6        | 0.5        | 0.8        |
| CD63 antigen (melanoma 1 antigen)                                                                   | CD63      | 0.4        | 0.4        | 0.3        | 0.3        |
| CDK2-associated protein 1                                                                           | CDK2AP1   | 0.8        | <b>1.9</b> | 0.5        | <b>1.2</b> |
| cell cycle progression 1                                                                            | CCPG1     | <b>1.3</b> | 0.6        | 0.8        | <b>1.8</b> |
| chemokine-like factor super family 6                                                                | CKLFSF6   | 0.6        | 0.6        | 0.4        | 0.7        |
| chloride intracellular channel 2                                                                    | CLIC2     | 0.7        | <b>2.6</b> | 0.4        | <b>1.1</b> |
| chromosome 1 open reading frame 19                                                                  | C1orf19   | 0.6        | 0.4        | 0.4        | 0.3        |
| chromosome 1 open reading frame 24                                                                  | C1orf24   | 0.4        | 0.8        | 0.9        | <b>1.5</b> |
| Chromosome 16 open reading frame 28                                                                 | C16orf28  | <b>1.4</b> | <b>1.1</b> | 0.8        | 0.7        |
| chromosome 20 open reading frame 139                                                                | C20orf139 | <b>1.6</b> | <b>1.9</b> | 0.5        | <b>1.9</b> |
| chromosome 20 open reading frame 24                                                                 | C20orf24  | 0.7        | 0.6        | 0.4        | 0.3        |
| chromosome 20 open reading frame 24                                                                 | C20orf24  | 0.7        | 0.6        | 0.3        | 0.3        |
| chromosome 20 open reading frame 24 ///                                                             | C20orf24  | 0.7        | 0.6        | 0.4        | 0.2        |
| chromosome 20 open reading frame 24<br><b>clone=IMAGE-163624 /clone_end=5'</b><br><b>/gb=H14241</b> |           | <b>1.3</b> | <b>1.6</b> | <b>1.3</b> | <b>1.5</b> |
| <b>clusterin (complement lysis inhibitor, apolipoprotein J)</b>                                     | CLU       | <b>1.0</b> | <b>2.1</b> | <b>1.5</b> | <b>2.9</b> |
| <b>clusterin (complement lysis inhibitor, apolipoprotein J)</b>                                     | CLU       | <b>1.1</b> | <b>1.9</b> | <b>1.4</b> | <b>2.7</b> |
| <b>CLONE=IMAGE:856163 /UG=Hs.315562 ESTs</b>                                                        |           | <b>1.5</b> | <b>2.8</b> | <b>1.5</b> | <b>1.8</b> |
| Hs.306243 Homo sapiens thioredoxin delta 3 .                                                        |           | 0.4        | 0.6        | 0.5        | 0.7        |
| Homo sapiens cDNA FLJ20042 fis, clone COL00424.                                                     |           | 0.8        | 0.6        | 0.5        | 0.9        |
| Human DNA sequence from clone RP5-1174N9                                                            |           | <b>3.5</b> | <b>2.7</b> | <b>1.2</b> | 0.9        |
| CLONE=HTBAGB11 /UG=Hs.5461 ESTs                                                                     |           | 0.7        | <b>1.0</b> | <b>1.0</b> | 0.7        |
| CLONE=IMAGE:3084358 /UG=Hs.77496                                                                    |           | 0.6        | <b>1.2</b> | 0.8        | 0.9        |
| <b>Hs.118786 metallothionein 2A</b><br><b>/FL=gb:NM_005953.1</b>                                    |           | <b>6.0</b> | <b>6.2</b> | <b>2.9</b> | <b>5.3</b> |
| cystathionase (cystathionine gamma-lyase)                                                           | CTH       | <b>1.5</b> | <b>1.2</b> | 0.8        | <b>1.3</b> |
| dimerization cofactor of hepatocyte nuclear factor 1 from muscle                                    | DCOHM     | 0.6        | 0.9        | 0.7        | 0.9        |
| DnaJ (Hsp40) homolog, subfamily A, member 1                                                         | DNAJA1    | 0.4        | 0.7        | 0.3        | 0.5        |
| DnaJ (Hsp40) homolog, subfamily B, member 1                                                         | DNAJB1    | 0.4        | 0.8        | 0.3        | 0.5        |
| DnaJ (Hsp40) homolog, subfamily B, member 1                                                         | DNAJB1    | 0.4        | 0.7        | 0.3        | 0.5        |

|                                                                    |               |     |     |     |     |
|--------------------------------------------------------------------|---------------|-----|-----|-----|-----|
| DnaJ (Hsp40) homolog, subfamily B, member 4                        | DNAJB4        | 1.6 | 2.0 | 0.7 | 1.2 |
| DnaJ (Hsp40) homolog, subfamily B, member 6                        | DNAJB6        | 0.8 | 1.0 | 0.4 | 0.7 |
| dynein, cytoplasmic, heavy polypeptide 1                           | DNCH1         | 0.6 | 0.8 | 0.6 | 0.8 |
| E74-like factor 4 (ets domain transcription factor)                | ELF4          | 1.1 | 0.9 | 0.4 | 2.3 |
| epoxide hydrolase 1, microsomal (xenobiotic)                       | EPHX1         | 1.0 | 0.4 | 1.2 | 1.5 |
| esophageal cancer associated protein                               | MGC16824      | 0.3 | 0.6 | 0.8 | 0.8 |
| <b>F-box protein 30</b>                                            | FBXO30        | 1.0 | 1.6 | 1.4 | 1.6 |
| <b>ferritin, heavy polypeptide 1</b>                               | FTH1          | 3.0 | 1.9 | 3.2 | 3.0 |
| <b>ferritin, heavy polypeptide 1</b>                               | FTH1          | 1.5 | 2.2 | 1.1 | 1.8 |
| ferritin, heavy polypeptide pseudogene 1                           | FTHP1         | 0.9 | 1.5 | 0.6 | 1.1 |
| ferrochelatase (protoporphyrin)                                    | FECH          | 0.6 | 0.6 | 0.6 | 1.2 |
| <b>GABA(A) receptor-associated protein like 1</b>                  | GABARAP       | 1.7 | 2.1 | 4.3 | 2.6 |
|                                                                    | L1            |     |     |     |     |
| galactosidase, alpha                                               | GLA           | 0.6 | 0.9 | 0.3 | 0.5 |
| galectin-3 internal gene                                           | GALIG         | 0.4 | 0.7 | 0.7 | 1.3 |
| <b>Hs.8765 RNA helicase-related protein</b>                        |               | 1.5 | 2.4 | 1.8 | 1.6 |
| <b>/FL=gb:AF078844.1</b>                                           |               |     |     |     |     |
| <b>Hs.326774 Homo sapiens metallothionein 1H-like protein mRNA</b> |               | 5.4 | 4.6 | 2.6 | 3.1 |
| Hs.8173 hypothetical protein FLJ10803                              |               | 0.6 | 0.8 | 0.9 | 1.0 |
| Hs.349076 /UG_TITLE=Homo sapiens partial mRNA                      |               | 0.7 | 0.6 | 0.5 | 0.8 |
| general transcription factor IIIC, polypeptide 3, 102kDa           | GTF3C3        | 0.7 | 0.7 | 0.4 | 0.7 |
| glucosidase, beta; acid (includes glucosylceramidase)              | GBA           | 1.4 | 1.2 | 0.5 | 0.8 |
| glucosidase, beta; acid (includes glucosylceramidase)              | GBA /// GBAP  | 1.2 | 1.2 | 0.4 | 1.0 |
| glutamate-cysteine ligase, catalytic subunit                       | GCLC          | 0.9 | 1.1 | 0.6 | 0.7 |
| glutamate-cysteine ligase, catalytic subunit                       | GCLC          | 0.9 | 1.0 | 0.4 | 0.8 |
| <b>glutamate-cysteine ligase, modifier subunit</b>                 | GCLM          | 1.3 | 2.8 | 1.3 | 1.8 |
| <b>glutamate-cysteine ligase, modifier subunit</b>                 | GCLM          | 1.2 | 2.7 | 1.5 | 1.7 |
| growth hormone inducible transmembrane protein                     | GHITM         | 0.8 | 0.8 | 0.3 | 0.6 |
| growth hormone inducible transmembrane protein                     | GHITM         | 0.8 | 0.6 | 0.3 | 0.5 |
| growth hormone inducible transmembrane protein                     | GHITM         | 0.7 | 0.5 | 0.4 | 0.4 |
| hematopoietic cell-specific Lyn substrate 1                        | HCLS1         | 0.5 | 0.3 | 0.4 | 0.7 |
| <b>heme oxygenase (decycling) 1</b>                                | HMOX1         | 3.8 | 6.0 | 3.2 | 5.3 |
| heterogeneous nuclear ribonucleoprotein A0                         | HNRPA0        | 0.5 | 0.7 | 0.4 | 0.5 |
| HIV-1 Tat interactive protein 2, 30kDa                             | HTATIP2       | 1.1 | 1.2 | 0.3 | 0.7 |
| Hypothetical LOC403340                                             | MGC70870      | 1.7 | 1.2 | 1.1 | 0.8 |
| hypothetical protein DKFZp761B1514                                 | DKFZp761B1514 | 0.5 | 0.4 | 0.3 | 0.4 |
| Hypothetical protein FLJ13611                                      | FLJ13611      | 1.1 | 1.5 | 0.4 | 1.2 |
| hypothetical protein FLJ20097                                      | FLJ20097      | 0.6 | 0.9 | 0.4 | 0.6 |
| <b>hypothetical protein FLJ20489</b>                               | FLJ20489      | 2.0 | 2.0 | 1.6 | 2.2 |
| hypothetical protein FLJ20489                                      | FLJ20489      | 0.7 | 0.9 | 0.6 | 1.3 |
| hypothetical protein FLJ31413                                      | FLJ31413      | 1.0 | 0.9 | 0.6 | 0.9 |
| <b>hypothetical protein FLJ36701</b>                               | FLJ36701      | 3.8 | 5.2 | 3.7 | 3.5 |
| hypothetical protein LOC339324                                     | LOC339324     | 0.6 | 0.7 | 0.4 | 0.5 |
| hypothetical protein LOC51315                                      | LOC51315      | 0.3 | 0.5 | 1.2 | 0.4 |
| hypothetical protein LOC51315                                      | LOC51315      | 0.4 | 0.4 | 0.5 | 0.3 |
| hypothetical protein LOC90637                                      | LOC90637      | 0.6 | 0.9 | 0.4 | 0.7 |
| <b>hypothetical protein MGC11324</b>                               | MGC11324      | 2.5 | 3.1 | 1.1 | 4.1 |

|                                                                        |           |            |            |            |            |
|------------------------------------------------------------------------|-----------|------------|------------|------------|------------|
| hypothetical protein MGC26717                                          | MGC26717  | 0.5        | 0.8        | 0.6        | 0.6        |
| inhibitor of DNA binding 3, dominant negative helix-loop-helix protein | ID3       | 0.4        | <b>5.1</b> | 0.9        | <b>3.0</b> |
| integrin, beta 5                                                       | ITGB5     | 0.7        | <b>1.1</b> | 0.5        | 0.7        |
| jumonji domain containing 1C                                           | JMJD1C    | 0.8        | 0.7        | 0.4        | 0.6        |
| kelch-like ECH-associated protein 1                                    | KEAP1     | 0.4        | 0.7        | 0.3        | 0.9        |
| KIAA0469 gene product                                                  | KIAA0469  | <b>2.2</b> | <b>2.4</b> | 0.6        | <b>1.0</b> |
| KIAA0582                                                               | KIAA0582  | 0.6        | 0.6        | 0.5        | 0.7        |
| KIAA0738 gene product                                                  | KIAA0738  | 0.6        | 0.3        | 0.5        | 0.5        |
| KIAA0746 protein                                                       | KIAA0746  | <b>1.2</b> | 0.3        | 0.8        | <b>3.6</b> |
| KIAA1632 protein                                                       | KIAA1632  | <b>1.0</b> | 0.9        | 0.5        | <b>1.2</b> |
| lectin, galactoside-binding, soluble, 8 (galectin 8)                   | LGALS8    | <b>1.1</b> | <b>1.4</b> | 0.8        | <b>1.0</b> |
| lectin, galactoside-binding, soluble, 8 (galectin 8)                   | LGALS8    | 0.9        | <b>1.2</b> | 0.6        | 0.9        |
| lectin, galactoside-binding, soluble, 8 (galectin 8)                   | LGALS8    | 0.4        | 0.7        | <b>1.1</b> | 0.7        |
| leupaxin                                                               | LPXN      | <b>1.1</b> | 0.8        | 0.6        | 0.7        |
| LIM and SH3 protein 1                                                  | LASP1     | 0.8        | 0.9        | 0.4        | 0.6        |
| limkain b1                                                             | LKAP      | <b>1.0</b> | 0.9        | 0.6        | 0.6        |
| low density lipoprotein receptor-related protein 10                    | LRP10     | 0.3        | 0.4        | 0.5        | 0.5        |
| major vault protein                                                    | MVP       | 0.5        | 0.9        | 0.8        | <b>1.3</b> |
| malic enzyme 1, NADP(+)-dependent, cytosolic                           | ME1       | <b>1.7</b> | <b>1.6</b> | 0.5        | <b>2.2</b> |
| <b>metallothionein 1F (functional)</b>                                 | MT1F      | <b>8.3</b> | <b>6.8</b> | <b>3.0</b> | <b>6.3</b> |
| <b>metallothionein 1F (functional)</b>                                 | MT1F      | <b>3.8</b> | <b>3.6</b> | <b>2.2</b> | <b>2.3</b> |
| <b>metallothionein 1G</b>                                              | MT1G      | <b>5.2</b> | <b>5.1</b> | <b>3.2</b> | <b>2.1</b> |
| <b>metallothionein 1H</b>                                              | MT1H      | <b>7.3</b> | <b>7.4</b> | <b>3.1</b> | <b>5.1</b> |
| <b>metallothionein 1X</b>                                              | MT1X      | <b>7.6</b> | <b>9.0</b> | <b>2.5</b> | <b>4.1</b> |
| <b>metallothionein 1X</b>                                              | MT1X      | <b>6.1</b> | <b>6.4</b> | <b>1.8</b> | <b>3.9</b> |
| <b>metallothionein 2A</b>                                              | MT2A      | <b>6.0</b> | <b>6.2</b> | <b>2.9</b> | <b>5.3</b> |
| microtubule-associated protein 1 light chain 3 beta                    | MAP1LC3B  | <b>1.1</b> | <b>1.0</b> | 0.4        | <b>1.3</b> |
| mitogen-activated protein kinase 1                                     | MAPK1     | 0.4        | 0.6        | 0.3        | 0.5        |
| mitogen-activated protein kinase kinase 1                              | MAP2K1IP1 | 0.7        | 0.6        | 0.6        | 0.8        |
| interacting protein 1                                                  | 1         |            |            |            |            |
| N-acetylglucosamine-1-phosphotransferase, gamma subunit                | GNPTG     | 0.6        | 0.7        | 0.3        | 0.4        |
| NACHT, leucine rich repeat and PYD containing 7                        | NALP7     | 0.8        | <b>1.2</b> | 0.8        | <b>1.9</b> |
| <b>NAD(P)H dehydrogenase, quinone 1</b>                                | NQO1      | <b>2.0</b> | <b>5.2</b> | <b>2.4</b> | <b>4.1</b> |
| <b>NAD(P)H dehydrogenase, quinone 1</b>                                | NQO1      | <b>1.8</b> | <b>3.0</b> | <b>1.9</b> | <b>3.0</b> |
| <b>NAD(P)H dehydrogenase, quinone 1</b>                                | NQO1      | <b>1.6</b> | <b>2.5</b> | <b>1.9</b> | <b>2.7</b> |
| <b>NAD(P)H dehydrogenase, quinone 2</b>                                | NQO2      | <b>2.7</b> | <b>1.8</b> | <b>1.2</b> | <b>1.4</b> |
| N-myc (and STAT) interactor                                            | NMI       | 0.7        | 0.8        | 0.4        | <b>1.7</b> |
| nuclear receptor coactivator 7                                         | NCOA7     | 0.8        | 0.7        | 0.3        | <b>1.1</b> |
| OCIA domain containing 2                                               | OCIAD2    | 0.7        | 0.5        | 0.5        | 0.4        |
| optineurin                                                             | OPTN      | 0.4        | 0.3        | 0.8        | <b>1.5</b> |
| origin recognition complex, subunit 3-like (yeast)                     | ORC3L     | 0.4        | 0.5        | 0.3        | 0.6        |
| oxysterol binding protein-like 3                                       | OSBPL3    | 0.5        | <b>1.0</b> | 0.3        | 0.8        |
| phosphoserine aminotransferase 1                                       | PSAT1     | 0.8        | 0.5        | <b>1.0</b> | <b>1.3</b> |
| phosphoserine aminotransferase 1                                       | PSAT1     | 0.8        | 0.5        | 0.9        | <b>1.3</b> |
| phosphotriesterase related                                             | PTER      | 0.8        | <b>1.0</b> | 0.5        | 0.6        |
| phosphotriesterase related                                             | PTER      | 0.5        | 0.9        | 0.7        | 0.7        |
| <b>pirin (iron-binding nuclear protein)</b>                            | PIR       | <b>1.6</b> | <b>2.2</b> | <b>1.4</b> | <b>1.2</b> |
| prosaposin                                                             | PSAP      | 0.4        | 0.5        | 0.5        | 0.7        |
| prosaposin                                                             | PSAP      | 0.5        | 0.5        | 0.4        | 0.6        |
| protein kinase C binding protein 1                                     | PRKCBP1   | 0.3        | 0.5        | 0.7        | 0.6        |

|                                                                  |          |            |            |            |            |
|------------------------------------------------------------------|----------|------------|------------|------------|------------|
| protein kinase, cAMP-dependent, catalytic, beta                  | PRKACB   | 0.9        | <b>1.4</b> | 0.5        | <b>1.4</b> |
| protein kinase, cAMP-dependent, catalytic, beta                  | PRKACB   | 0.8        | <b>1.2</b> | 0.5        | 0.9        |
| RAB10, member RAS oncogene family                                | RAB10    | 0.6        | 0.7        | 0.2        | 0.3        |
| RAS and EF hand domain containing                                | RASEF    | 0.8        | 0.9        | 0.5        | <b>1.5</b> |
| Ras association (RalGDS/AF-6) domain family 2                    | RASSF2   | <b>1.0</b> | <b>2.5</b> | 0.5        | 0.7        |
| Retinoblastoma-associated factor 600                             | RBAF600  | 0.9        | 0.7        | 0.5        | 0.5        |
| RIO kinase 3 (yeast) /// RIO kinase 3 (yeast)                    | RIOK3    | 0.8        | 0.8        | 0.5        | 0.7        |
| <b>sequestosome 1</b>                                            | SQSTM1   | <b>2.4</b> | <b>3.9</b> | <b>2.0</b> | <b>5.6</b> |
| <b>sequestosome 1</b>                                            | SQSTM1   | <b>1.1</b> | <b>2.0</b> | <b>1.2</b> | <b>2.2</b> |
| Serine hydroxymethyltransferase 1 (soluble)                      | SHMT1    | <b>1.0</b> | 0.7        | 0.5        | 0.9        |
| seryl-tRNA synthetase                                            | SARS     | 0.5        | 0.3        | 0.3        | 0.8        |
| <b>sestrin 2</b>                                                 | SESN2    | <b>1.2</b> | <b>1.0</b> | <b>1.0</b> | <b>2.4</b> |
| sestrin 2                                                        | SESN2    | <b>1.3</b> | <b>1.1</b> | 0.9        | <b>2.2</b> |
| Similar to CG14903-PA                                            |          | 0.7        | <b>1.2</b> | 0.5        | <b>1.0</b> |
| similar to KIAA0592 protein /// hypothetical protein FLJ10824    | FLJ10824 | 0.9        | 0.7        | 0.3        | <b>1.3</b> |
| Solute carrier family 30 (zinc transporter), member 1            | SLC30A1  | <b>2.9</b> | 0.7        | 0.9        | <b>1.1</b> |
| solute carrier family 30 (zinc transporter), member 1            | SLC30A1  | <b>2.9</b> | <b>1.1</b> | 0.5        | <b>1.0</b> |
| solute carrier family 38, member 6                               | SLC38A6  | <b>2.2</b> | <b>2.5</b> | 0.8        | <b>1.6</b> |
| <b>solute carrier family 7, member 11</b>                        | SLC7A11  | <b>2.3</b> | <b>2.6</b> | <b>1.5</b> | <b>3.4</b> |
| <b>solute carrier family 7, member 11</b>                        | SLC7A11  | <b>2.1</b> | <b>2.8</b> | <b>1.4</b> | <b>2.8</b> |
| SRB7 suppressor of RNA polymerase B homolog (yeast)              | SURB7    | 0.4        | 0.8        | 0.3        | 0.6        |
| superoxide dismutase 1, soluble                                  | SOD1     | 0.3        | 0.5        | 0.2        | 0.4        |
| syndecan binding protein (syntenin)                              | SDCBP    | 0.5        | 0.6        | 0.4        | <b>1.1</b> |
| testis derived transcript (3 LIM domains)                        | TES      | 0.7        | 0.5        | 0.9        | <b>1.2</b> |
| testis derived transcript (3 LIM domains)                        | TES      | 0.7        | 0.4        | 0.6        | 0.8        |
| tetratricopeptide repeat domain 14                               | TTC14    | <b>1.0</b> | 0.7        | 0.8        | <b>1.0</b> |
| tetratricopeptide repeat domain 14                               | TTC14    | 0.7        | 0.7        | 0.9        | 0.7        |
| thioredoxin                                                      | TXN      | 0.7        | 0.6        | 0.3        | 0.6        |
| benzodiazapine receptor associated protein 1 [Rattus norvegicus] |          | 0.6        | <b>1.4</b> | <b>1.3</b> | <b>1.2</b> |
| tribbles homolog 3 (Drosophila)                                  | TRIB3    | <b>1.5</b> | <b>1.0</b> | 0.4        | <b>1.6</b> |
| tubulin, alpha 3                                                 | TUBA3    | 0.6        | <b>1.7</b> | 0.7        | <b>1.7</b> |
| tubulin, beta polypeptide                                        | TUBB     | <b>1.4</b> | <b>1.8</b> | 0.5        | <b>2.4</b> |
| tumor differentially expressed 2                                 | TDE2     | 0.5        | 0.4        | 0.3        | 0.8        |
| tumor necrosis factor receptor superfamily, member 6             | TNFRSF6  | 0.6        | <b>1.9</b> | 0.5        | 0.8        |
| ubiquitin-conjugating enzyme E2A (RAD6 homolog)                  | UBE2A    | 0.2        | 0.5        | 0.4        | 0.7        |
| upregulated in colorectal cancer gene 1                          | UCC1     | 0.9        | 0.6        | 0.7        | 0.4        |
| v-maf musculoaponeurotic fibrosarcoma oncogene homolog G         | MAFG     | <b>1.0</b> | <b>1.2</b> | 0.7        | <b>1.0</b> |
| zinc finger protein 262                                          | ZNF262   | 0.5        | 0.5        | 0.3        | 0.5        |
| zinc finger protein 302                                          | ZNF302   | 0.7        | 0.7        | 0.4        | 0.9        |
| zinc finger protein 364                                          | ZNF364   | 0.4        | 0.7        | 0.3        | 0.6        |
| zinc finger, X-linked, duplicated B                              | ZXDB     | <b>1.1</b> | 0.9        | 0.8        | 0.9        |

**LogRatios for up-regulated genes at 48 h in all cell lines**

**Two-fold changes are in red bold**

| <b>Gene Descriptor</b>                                                           | <b>Symbol</b> | <b>U266<br/>48h</b> | <b>MM.1s<br/>48h</b> | <b>8226/S<br/>48h</b> | <b>KMS11<br/>48h</b> |
|----------------------------------------------------------------------------------|---------------|---------------------|----------------------|-----------------------|----------------------|
| actin-related protein 10 homolog (S. cerevisiae)                                 | ACTR10        | 0.6                 | 0.8                  | 0.4                   | <b>1.2</b>           |
| activating transcription factor 5                                                | ATF5          | 0.5                 | <b>1.4</b>           | 0.5                   | 0.6                  |
| acyl-Coenzyme A oxidase 1, palmitoyl                                             | ACOX1         | 0.8                 | <b>1.5</b>           | 0.5                   | 0.8                  |
| acylphosphatase 2, muscle type                                                   | ACYP2         | 0.6                 | <b>1.5</b>           | 0.8                   | <b>1.4</b>           |
| ADP-ribosylation factor guanine nucleotide-exchange factor 1                     | ARFGEF1       | 0.7                 | 0.5                  | 0.6                   | 0.6                  |
| <b>aldo-keto reductase family 1, member C3</b>                                   | AKR1C3        | <b>1.2</b>          | <b>3.3</b>           | <b>3.3</b>            | <b>6.6</b>           |
| ankyrin repeat domain 28                                                         | ANKRD28       | 0.9                 | 0.4                  | 0.4                   | 0.6                  |
| annexin A4                                                                       | ANXA4         | <b>1.1</b>          | <b>1.1</b>           | 0.6                   | <b>1.2</b>           |
| annexin A4                                                                       | ANXA4         | 0.8                 | <b>1.2</b>           | 0.6                   | <b>1.0</b>           |
| AIF-like mitochondrion-associated inducer of death                               | AMID          | <b>1.9</b>          | <b>1.9</b>           | 0.5                   | <b>1.3</b>           |
| <b>arachidonate 5-lipoxygenase-activating protein</b>                            | ALOX5AP       | <b>2.1</b>          | <b>2.1</b>           | <b>1.3</b>            | <b>2.9</b>           |
| Ariadne homolog, ubiquitin-conjugating enzyme E2 binding protein, 1 (Drosophila) | ARIH1         | 0.7                 | 0.8                  | 0.4                   | 0.4                  |
| arsA arsenite transporter, ATP-binding, homolog 1 (bacterial)                    | ASNA1         | 0.2                 | 0.5                  | 0.3                   | 0.5                  |
| ASF1 anti-silencing function 1 homolog A (S. cerevisiae)                         | ASF1A         | 0.7                 | <b>1.9</b>           | 0.4                   | <b>1.2</b>           |
| ATPase, H <sup>+</sup> transporting, lysosomal 38kDa, V0 subunit d isoform 1     | ATP6V0D1      | 0.5                 | 0.4                  | 0.4                   | 0.9                  |
| ATPase, H <sup>+</sup> transporting, lysosomal V0 subunit a isoform 1            | ATP6V0A1      | 0.4                 | 0.6                  | 0.7                   | 0.7                  |
| B-cell CLL/lymphoma 2                                                            | BCL2          | 0.8                 | 0.6                  | 0.7                   | 0.6                  |
| biliverdin reductase B (flavin reductase (NADPH))                                | BLVRB         | <b>1.4</b>          | <b>2.1</b>           | 0.8                   | <b>3.5</b>           |
| BTB and CNC homology 1, basic leucine zipper transcription factor 1              | BACH1         | <b>1.0</b>          | <b>1.2</b>           | 0.6                   | <b>1.9</b>           |
| BTB and CNC homology 1, basic leucine zipper transcription factor 1              | BACH1         | 0.7                 | 0.7                  | 0.6                   | <b>1.6</b>           |
| CARD only protein                                                                | COP           | <b>1.2</b>          | <b>1.2</b>           | 0.5                   | <b>1.4</b>           |
| caspase 8, apoptosis-related cysteine protease                                   | CASP8         | 0.6                 | 0.5                  | 0.5                   | 0.5                  |
| cathepsin B                                                                      | CTSB          | <b>1.2</b>          | <b>1.4</b>           | 0.8                   | 0.8                  |
| cathepsin B                                                                      | CTSB          | <b>1.0</b>          | <b>1.5</b>           | 0.8                   | 0.7                  |
| cathepsin B                                                                      | CTSB          | <b>1.0</b>          | <b>1.3</b>           | 0.6                   | 0.7                  |
| CCAAT/enhancer binding protein (C/EBP), beta                                     | CEBPB         | 0.9                 | 0.9                  | <b>1.1</b>            | <b>2.3</b>           |
| CCAAT/enhancer binding protein (C/EBP), gamma                                    | CEBPG         | 0.4                 | 0.7                  | <b>1.0</b>            | <b>1.3</b>           |
| CD63 antigen (melanoma 1 antigen)                                                | CD63          | 0.5                 | 0.5                  | 0.5                   | 0.7                  |
| <b>CDNA FLJ41270 fis, clone BRAMY2036387</b>                                     |               | <b>1.6</b>          | <b>2.1</b>           | <b>1.0</b>            | <b>1.7</b>           |
| cell cycle progression 1                                                         | CCPG1         | <b>1.0</b>          | 0.8                  | <b>1.8</b>            | <b>2.7</b>           |
| cell cycle progression 1                                                         | CCPG1         | <b>1.0</b>          | 0.7                  | <b>1.7</b>            | <b>2.7</b>           |
| <b>cell cycle progression 1</b>                                                  | CCPG1         | <b>1.1</b>          | <b>1.1</b>           | <b>1.4</b>            | <b>2.3</b>           |
| chemokine-like factor super family 6                                             | CKLFSF6       | 0.6                 | 0.6                  | 0.3                   | 0.6                  |
| chloride intracellular channel 2                                                 | CLIC2         | <b>2.9</b>          | <b>2.7</b>           | 0.4                   | <b>1.3</b>           |
| chromosome 10 open reading frame 45                                              | C10orf45      | 0.3                 | 0.4                  | 0.6                   | <b>1.7</b>           |
| chromosome 10 open reading frame 45                                              | C10orf45      | 0.3                 | 0.4                  | 0.4                   | <b>1.3</b>           |
| chromosome 13 open reading frame 11                                              | C13orf11      | 0.4                 | 0.4                  | 0.8                   | <b>1.2</b>           |
| Chromosome 16 open reading frame 28                                              | C16orf28      | <b>1.2</b>          | <b>1.5</b>           | 0.6                   | <b>1.2</b>           |
| chromosome 20 open reading frame 139                                             | C20orf139     | <b>1.5</b>          | <b>2.1</b>           | 0.6                   | <b>2.4</b>           |

|                                                               |                |            |            |            |            |
|---------------------------------------------------------------|----------------|------------|------------|------------|------------|
| chromosome 20 open reading frame 24                           | C20orf24       | 0.5        | 0.7        | 0.3        | 0.5        |
| chromosome 20 open reading frame 24                           | C20orf24       | 0.4        | 0.5        | 0.3        | 0.3        |
| chromosome 9 open reading frame 55                            | C9orf55        | <b>1.1</b> | 0.5        | 0.8        | <b>1.2</b> |
| chromosome X open reading frame 45                            | CXorf45        | 0.6        | 0.8        | 0.6        | 0.4        |
| <b>clone=IMAGE-163624 /clone_end=5'</b>                       |                | <b>1.4</b> | <b>1.6</b> | <b>1.5</b> | <b>2.1</b> |
| <b>/gb=H14241 /gi=879061</b>                                  |                |            |            |            |            |
| clusterin (complement lysis inhibitor, apolipoprotein J)      | CLU            | 0.9        | <b>1.6</b> | <b>1.2</b> | <b>2.9</b> |
| clusterin (complement lysis inhibitor, apolipoprotein J)      | CLU            | 0.8        | <b>1.5</b> | <b>1.4</b> | <b>2.6</b> |
| <b>CLONE=IMAGE:856163 /UG=Hs.315562 ESTs</b>                  |                | <b>1.3</b> | <b>2.7</b> | <b>1.6</b> | <b>1.9</b> |
| CLONE=IMAGE:2176544 /UG=Hs.177135 ESTs                        |                | <b>1.1</b> | <b>1.8</b> | 0.8        | 0.6        |
| CLONE=IMAGE:2347851 /UG=Hs.148154 ESTs                        |                | 0.7        | 0.8        | 0.6        | 0.4        |
| CLONE=IMAGE:2508169 /UG=Hs.134791 ESTs                        |                | <b>1.2</b> | <b>1.5</b> | 0.7        | <b>1.4</b> |
| Hs.183861 Homo sapiens cDNA FLJ20042                          |                | 0.8        | 0.9        | <b>1.0</b> | <b>1.5</b> |
| CLONE=IMAGE:2729211 /UG=Hs.124554 ESTs                        |                | 0.9        | <b>1.6</b> | 0.8        | 0.7        |
| <b>Hs.118786 metallothionein 2A</b>                           |                | <b>5.7</b> | <b>6.2</b> | <b>2.5</b> | <b>5.8</b> |
| <b>/FL=gb:NM_005953.1</b>                                     |                |            |            |            |            |
| cylindromatosis (turban tumor syndrome)                       | CYLD           | 0.2        | 0.7        | 0.7        | 0.7        |
| <b>cystathionase (cystathionine gamma-lyase)</b>              | CTH            | <b>1.5</b> | <b>1.5</b> | <b>2.3</b> | <b>2.1</b> |
| cystathionase (cystathionine gamma-lyase)                     | CTH            | <b>1.3</b> | <b>1.0</b> | <b>2.2</b> | 0.8        |
| DKFZP564G2022 protein                                         | DKFZP564G2022  | 0.3        | 0.5        | 0.3        | 0.7        |
| DKFZP564G2022 protein                                         | DKFZP564G2022  | 0.3        | 0.5        | 0.3        | 0.6        |
| DNA-damage-inducible transcript 4                             | DDIT4          | 0.6        | <b>1.1</b> | <b>2.2</b> | 0.7        |
| DnaJ (Hsp40) homolog, subfamily B, member 4                   | DNAJB4         | <b>1.5</b> | <b>1.5</b> | 0.9        | <b>1.4</b> |
| DRE1 protein                                                  | DRE1           | <b>1.2</b> | <b>1.5</b> | 0.8        | <b>1.9</b> |
| dynein, cytoplasmic, heavy polypeptide 1                      | DNCH1          | 0.3        | 0.8        | 0.8        | <b>1.3</b> |
| E74-like factor 4 (ets domain transcription factor)           | ELF4           | <b>1.2</b> | <b>1.2</b> | 0.5        | <b>3.0</b> |
| erbB2 interacting protein                                     | ERBB2IP        | 0.6        | 0.6        | 0.4        | 0.8        |
| erythrocyte membrane protein band 4.1                         | EPB41          | 0.4        | 0.7        | 0.3        | 0.9        |
| ets variant gene 5 (ets-related molecule)                     | ETV5           | 0.8        | 0.6        | <b>1.1</b> | 0.4        |
| eukaryotic translation initiation factor 4E binding protein 1 | EIF4EBP1       | 0.6        | 0.7        | 0.6        | <b>1.5</b> |
| Farnesyl-diphosphate farnesyltransferase 1                    | FDFT1          | <b>1.4</b> | <b>1.7</b> | <b>1.2</b> | 0.8        |
| Farnesyl-diphosphate farnesyltransferase 1                    | FDFT1          | <b>1.1</b> | <b>1.6</b> | <b>1.2</b> | 0.8        |
| <b>F-box protein 30</b>                                       | FBXO30         | <b>1.0</b> | <b>1.4</b> | <b>1.6</b> | <b>2.2</b> |
| <b>ferritin, heavy polypeptide 1</b>                          | FTH1           | <b>3.0</b> | <b>2.8</b> | <b>3.7</b> | <b>3.3</b> |
| <b>ferritin, heavy polypeptide 1</b>                          | FTH1           | <b>1.4</b> | <b>2.6</b> | <b>1.3</b> | <b>2.1</b> |
| ferritin, heavy polypeptide pseudogene 1                      | FTHP1          | 0.5        | <b>1.8</b> | 0.5        | <b>1.3</b> |
| ferrochelatase (protoporphyrin)                               | FECH           | 0.3        | 0.5        | 0.9        | <b>1.4</b> |
| GABA(A) receptor-associated protein                           | GABARAP        | 0.5        | 0.5        | 0.4        | <b>1.0</b> |
| <b>GABA(A) receptor-associated protein like 1</b>             | GABARAP        | <b>1.6</b> | <b>2.8</b> | <b>5.0</b> | <b>3.0</b> |
|                                                               | L1             |            |            |            |            |
| gamma-glutamyltransferase 1                                   | GGT1           | <b>1.3</b> | 0.9        | 0.3        | 0.5        |
| gamma-glutamyltransferase-like 4                              | GGTL4 /// GGT1 | 0.9        | 0.8        | 0.3        | 0.4        |
| Hs.8765 RNA helicase-related protein /FL=gb:AF078844.         |                | <b>1.6</b> | <b>1.7</b> | 0.9        | <b>1.5</b> |
| <b>Hs.326774 Homo sapiens metallothionein 1H-like protein</b> |                | <b>5.2</b> | <b>4.4</b> | <b>2.1</b> | <b>3.2</b> |
| Hs.349076 /UG_TITLE=Homo sapiens partial mRNA                 |                | 0.4        | 0.5        | <b>1.1</b> | <b>1.0</b> |

|                                                                        |                 |            |            |            |            |
|------------------------------------------------------------------------|-----------------|------------|------------|------------|------------|
| CLONE=IMAGE:4523513 /TID=Hs2.374629.1                                  |                 | 0.4        | <b>1.0</b> | 0.9        | <b>2.0</b> |
| GCIP-interacting protein p29                                           | P29             | 0.5        | 0.7        | 0.4        | 0.9        |
| general transcription factor IIIC, polypeptide 3, 102kDa               | GTF3C3          | 0.5        | 0.6        | 0.6        | 0.7        |
| glucosidase, beta; acid (includes glucosylceramidase)                  | GBA             | <b>1.3</b> | <b>1.1</b> | 0.5        | <b>1.2</b> |
| glucosidase, beta; acid (includes glucosylceramidase)                  | GBA ///<br>GBAP | <b>1.4</b> | <b>1.2</b> | 0.4        | <b>1.4</b> |
| glutamate-ammonia ligase (glutamine synthase)                          | GLUL            | 0.8        | <b>1.3</b> | 0.4        | <b>1.5</b> |
| glutamate-ammonia ligase (glutamine synthase)                          | GLUL            | 0.7        | <b>1.1</b> | 0.3        | <b>1.5</b> |
| glutamate-cysteine ligase, catalytic subunit                           | GCLC            | 0.9        | <b>1.3</b> | 0.9        | <b>1.1</b> |
| glutamate-cysteine ligase, catalytic subunit                           | GCLC            | 0.9        | <b>1.2</b> | 0.9        | <b>1.0</b> |
| <b>glutamate-cysteine ligase, modifier subunit</b>                     | GCLM            | <b>1.3</b> | <b>2.8</b> | <b>1.6</b> | <b>1.8</b> |
| <b>glutamate-cysteine ligase, modifier subunit</b>                     | GCLM            | <b>1.2</b> | <b>2.8</b> | <b>1.4</b> | <b>1.9</b> |
| glutamic pyruvate transaminase (alanine aminotransferase) 2            | GPT2            | 0.6        | 0.6        | <b>1.7</b> | <b>1.5</b> |
| granulin                                                               | GRN             | <b>1.0</b> | 0.3        | 0.5        | 0.6        |
| growth hormone inducible transmembrane protein                         | GHITM           | 0.5        | 0.9        | 0.4        | <b>1.0</b> |
| growth hormone inducible transmembrane protein                         | GHITM           | 0.6        | 0.7        | 0.5        | 0.9        |
| growth hormone inducible transmembrane protein                         | GHITM           | 0.5        | 0.6        | 0.4        | 0.8        |
| hematopoietic cell-specific Lyn substrate 1                            | HCLS1           | 0.4        | 0.5        | 0.5        | <b>1.1</b> |
| <b>heme oxygenase (decycling) 1</b>                                    | HMOX1           | <b>3.6</b> | <b>5.9</b> | <b>3.2</b> | <b>6.0</b> |
| HMG-box transcription factor 1                                         | HBP1            | 0.8        | <b>1.4</b> | 0.9        | <b>1.7</b> |
| hypothetical protein BC004921                                          | LOC93349        | 0.4        | 0.6        | 0.5        | 0.8        |
| <b>hypothetical protein FLJ11000</b>                                   | FLJ11000        | <b>1.0</b> | <b>2.0</b> | <b>1.5</b> | <b>2.8</b> |
| hypothetical protein FLJ11011                                          | FLJ11011        | 0.5        | 0.9        | 0.5        | 0.8        |
| <b>Hypothetical protein FLJ13611</b>                                   | FLJ13611        | <b>1.5</b> | <b>1.7</b> | <b>1.0</b> | <b>1.6</b> |
| hypothetical protein FLJ20097                                          | FLJ20097        | 0.8        | 0.9        | 0.5        | 0.9        |
| <b>hypothetical protein FLJ20489</b>                                   | FLJ20489        | <b>2.1</b> | <b>2.0</b> | <b>1.8</b> | <b>2.9</b> |
| hypothetical protein FLJ20489                                          | FLJ20489        | 0.8        | <b>1.2</b> | <b>1.0</b> | <b>1.3</b> |
| hypothetical protein FLJ20716                                          | FLJ20716        | <b>1.8</b> | <b>1.6</b> | 0.8        | <b>1.2</b> |
| hypothetical protein FLJ21439                                          | FLJ21439        | 0.6        | 0.5        | 0.3        | <b>1.1</b> |
| hypothetical protein FLJ22405                                          | FLJ22405        | 0.4        | 0.5        | 0.5        | 0.8        |
| hypothetical protein FLJ22833                                          | FLJ22833        | <b>1.2</b> | 0.9        | 0.5        | 0.6        |
| hypothetical protein FLJ23749                                          | FLJ23749        | 0.5        | 0.7        | 0.3        | <b>1.4</b> |
| hypothetical protein FLJ31413                                          | FLJ31413        | <b>1.1</b> | <b>1.0</b> | 0.7        | <b>1.4</b> |
| Hypothetical protein FLJ32421                                          | FLJ32421        | 0.3        | 0.7        | 0.4        | 0.8        |
| <b>hypothetical protein FLJ36701</b>                                   | FLJ36701        | <b>4.0</b> | <b>5.3</b> | <b>3.9</b> | <b>3.9</b> |
| hypothetical protein LOC150271                                         | LOC150271       | 0.8        | <b>2.6</b> | 0.8        | 0.8        |
| hypothetical protein LOC201895                                         | LOC201895       | 0.8        | 0.8        | <b>1.1</b> | <b>1.6</b> |
| Hypothetical protein LOC201895                                         | LOC201895       | 0.5        | <b>1.2</b> | <b>1.1</b> | <b>1.3</b> |
| Hypothetical protein LOC285972                                         | LOC285972       | <b>2.3</b> | 0.3        | 0.6        | <b>1.1</b> |
| hypothetical protein LOC339924                                         | LOC339924       | <b>1.3</b> | <b>1.2</b> | 0.9        | <b>2.2</b> |
| hypothetical protein LOC51315                                          | LOC51315        | 0.4        | 0.5        | 0.7        | 0.4        |
| <b>hypothetical protein MGC11324</b>                                   | MGC11324        | <b>2.6</b> | <b>3.3</b> | <b>1.5</b> | <b>4.6</b> |
| hypothetical protein MGC4504                                           | MGC4504         | 0.6        | 0.7        | <b>2.4</b> | <b>2.6</b> |
| IBR domain containing 3                                                | IBRDC3          | 0.7        | 0.9        | 0.7        | <b>1.3</b> |
| inhibitor of DNA binding 2, dominant negative helix-loop-helix protein | ID2             | <b>1.2</b> | <b>3.4</b> | 0.9        | <b>3.2</b> |
| inhibitor of DNA binding 3, dominant negative helix-loop-helix protein | ID3             | 0.5        | <b>4.6</b> | 0.8        | <b>3.4</b> |
| integrin, beta 5                                                       | ITGB5           | 0.5        | <b>1.3</b> | 0.9        | 0.5        |
| interferon-related developmental regulator 1                           | IFRD1           | <b>1.0</b> | 0.9        | 0.8        | <b>1.6</b> |



|                                                                                 |               |            |            |            |            |
|---------------------------------------------------------------------------------|---------------|------------|------------|------------|------------|
| Interferon-related developmental regulator 1                                    | IFRD1         | <b>1.0</b> | 0.7        | 0.7        | <b>1.3</b> |
| intracellular memb.-assoc. Ca <sup>2+</sup> -independent phospholipase A2 gamma | IPLA2(GA MMA) | 0.4        | 0.7        | 0.6        | <b>1.1</b> |
| intracellular memb.-assoc. Ca <sup>2+</sup> -independent phospholipase A2 gamma | IPLA2(GA MMA) | 0.4        | 0.6        | 0.6        | <b>1.0</b> |
| isocitrate dehydrogenase 1 (NADP+), soluble                                     | IDH1          | <b>1.2</b> | 0.7        | 0.4        | <b>2.1</b> |
| isocitrate dehydrogenase 1 (NADP+), soluble                                     | IDH1          | <b>1.0</b> | 0.7        | 0.6        | <b>2.0</b> |
| jumonji domain containing 1C                                                    | JMJD1C        | 0.8        | 0.6        | 0.7        | 0.9        |
| jumonji domain containing 1C                                                    | JMJD1C        | 0.6        | 0.6        | 0.5        | 0.6        |
| KIAA0469 gene product                                                           | KIAA0469      | <b>2.2</b> | <b>2.8</b> | 0.8        | <b>1.9</b> |
| KIAA0582                                                                        | KIAA0582      | 0.6        | 0.5        | 0.8        | 0.7        |
| KIAA0592 protein /// KIAA0592 protein                                           | KIAA0592      | 0.9        | 0.9        | 0.4        | <b>1.5</b> |
| KIAA0746 protein                                                                | KIAA0746      | <b>1.0</b> | 0.3        | <b>1.7</b> | <b>4.2</b> |
| KIAA1468                                                                        | KIAA1468      | 0.3        | 0.6        | 0.4        | 0.7        |
| KIAA1632 protein                                                                | KIAA1632      | <b>1.3</b> | <b>1.2</b> | 0.8        | <b>1.7</b> |
| KIAA1632 protein                                                                | KIAA1632      | <b>1.1</b> | 0.6        | 0.3        | <b>1.6</b> |
| <b>lectin, galactoside-binding, soluble, 8 (galectin 8)</b>                     | LGALS8        | <b>1.3</b> | <b>1.3</b> | <b>2.5</b> | <b>1.1</b> |
| <b>lectin, galactoside-binding, soluble, 8 (galectin 8)</b>                     | LGALS8        | <b>1.3</b> | <b>1.4</b> | <b>1.4</b> | <b>1.4</b> |
| <b>lectin, galactoside-binding, soluble, 8 (galectin 8)</b>                     | LGALS8        | <b>1.0</b> | <b>1.2</b> | <b>1.0</b> | <b>1.1</b> |
| lectin, galactoside-binding, soluble, 8 (galectin 8)                            | LGALS8        | 0.7        | 0.8        | <b>1.1</b> | 0.8        |
| lectin, galactoside-binding, soluble, 8 (galectin 8)                            | LGALS8        | 0.6        | 0.9        | 0.7        | 0.9        |
| leucine rich repeat (in FLII) interacting protein 2                             | LRRFIP2       | 0.5        | 0.9        | 0.6        | <b>1.3</b> |
| leupaxin                                                                        | LPXN          | <b>1.3</b> | 0.8        | 0.8        | 0.9        |
| LIM and SH3 protein 1                                                           | LASP1         | 0.8        | 0.9        | 0.7        | 0.8        |
| limkain b1                                                                      | LKAP          | <b>1.0</b> | <b>1.4</b> | 0.8        | 0.9        |
| lysosomal-associated membrane protein 1                                         | LAMP1         | 0.3        | 0.4        | 0.4        | 0.7        |
| lysosomal-associated membrane protein 2                                         | LAMP2         | 0.6        | 0.7        | 0.7        | 0.7        |
| lysosomal-associated membrane protein 2                                         | LAMP2         | 0.4        | 0.7        | 0.7        | 0.8        |
| major histocompatibility complex, class I-related                               | MR1           | 0.9        | <b>1.4</b> | <b>1.0</b> | 0.8        |
| major histocompatibility complex, class I-related                               | MR1           | 0.5        | <b>1.2</b> | 0.3        | 0.7        |
| <b>major vault protein</b>                                                      | MVP           | <b>1.1</b> | <b>1.1</b> | <b>1.2</b> | <b>1.4</b> |
| <b>malic enzyme 1, NADP(+)-dependent, cytosolic</b>                             | ME1           | <b>1.5</b> | <b>1.7</b> | <b>1.0</b> | <b>2.8</b> |
| Malic enzyme 1, NADP(+)-dependent, cytosolic                                    | ME1           | <b>1.5</b> | <b>1.8</b> | 0.9        | <b>2.5</b> |
| membrane component, chromosome 17, surface marker 2                             | M17S2         | 0.5        | <b>1.0</b> | 0.4        | 0.9        |
| membrane component, chromosome 17, surface marker 2                             | M17S2         | 0.3        | 0.8        | 0.7        | 0.6        |
| <b>metallothionein 1E (functional)</b>                                          | MT1E          | <b>6.9</b> | <b>3.6</b> | <b>2.9</b> | <b>2.2</b> |
| <b>metallothionein 1F (functional)</b>                                          | MT1F          | <b>7.5</b> | <b>6.9</b> | <b>1.4</b> | <b>6.3</b> |
| <b>metallothionein 1F (functional)</b>                                          | MT1F          | <b>3.2</b> | <b>3.4</b> | <b>1.1</b> | <b>2.5</b> |
| <b>metallothionein 1G</b>                                                       | MT1G          | <b>4.8</b> | <b>5.1</b> | <b>2.5</b> | <b>2.6</b> |
| <b>metallothionein 1H</b>                                                       | MT1H          | <b>7.8</b> | <b>7.4</b> | <b>2.6</b> | <b>5.5</b> |
| <b>metallothionein 1X</b>                                                       | MT1X          | <b>7.3</b> | <b>9.1</b> | <b>2.1</b> | <b>4.6</b> |
| <b>metallothionein 1X</b>                                                       | MT1X          | <b>5.7</b> | <b>6.3</b> | <b>1.9</b> | <b>4.4</b> |
| <b>metallothionein 2A</b>                                                       | MT2A          | <b>5.7</b> | <b>6.2</b> | <b>2.5</b> | <b>5.8</b> |
| methionine sulfoxide reductase B                                                | MSRB          | 0.6        | 0.8        | 0.5        | 0.3        |
| microtubule-associated protein 1 light chain 3 beta                             | MAP1LC3B      | 0.9        | 0.9        | 0.8        | <b>1.9</b> |
| microtubule-associated protein 1 light chain 3 beta                             | MAP1LC3B      | 0.9        | 0.9        | 0.6        | <b>1.6</b> |
| mitogen-activated protein kinase kinase 1 interacting protein 1                 | MAP2K1IP1     | 0.8        | 0.6        | 0.6        | <b>1.0</b> |
| N-acetylglucosamine kinase /// N-acetylglucosamine kinase                       | NAGK          | 0.6        | 0.6        | 0.7        | <b>1.0</b> |
| N-acetylglucosamine-1-phosphotransferase,                                       | GNPTG         | 0.8        | 0.9        | 0.9        | 0.8        |

|                                                               |          |            |            |            |            |
|---------------------------------------------------------------|----------|------------|------------|------------|------------|
| gamma subunit                                                 |          |            |            |            |            |
| NACHT, leucine rich repeat and PYD containing 7               | NALP7    | 0.6        | <b>1.1</b> | 0.9        | <b>1.9</b> |
| <b>NAD(P)H dehydrogenase, quinone 1</b>                       | NQO1     | <b>2.4</b> | <b>5.5</b> | <b>3.0</b> | <b>4.2</b> |
| <b>NAD(P)H dehydrogenase, quinone 1</b>                       | NQO1     | <b>1.9</b> | <b>3.1</b> | <b>2.1</b> | <b>3.2</b> |
| <b>NAD(P)H dehydrogenase, quinone 1</b>                       | NQO1     | <b>1.8</b> | <b>2.6</b> | <b>2.3</b> | <b>3.0</b> |
| <b>NAD(P)H dehydrogenase, quinone 2</b>                       | NQO2     | <b>2.7</b> | <b>2.2</b> | <b>1.1</b> | <b>2.1</b> |
| N-myc (and STAT) interactor                                   | NMI      | <b>1.1</b> | 0.8        | 0.5        | <b>1.9</b> |
| nuclear factor (erythroid-derived 2)-like 1                   | NFE2L1   | 0.5        | <b>1.1</b> | 0.6        | <b>1.8</b> |
| nuclear factor (erythroid-derived 2)-like 2                   | NFE2L2   | 0.6        | 0.6        | 0.4        | 0.6        |
| nuclear receptor coactivator 4                                | NCOA4    | 0.4        | 0.3        | 0.3        | 0.4        |
| nuclear receptor coactivator 7                                | NCOA7    | 0.5        | 0.7        | 0.8        | <b>1.6</b> |
| OCIA domain containing 2                                      | OCIAD2   | 0.9        | 0.7        | 0.6        | 0.5        |
| <b>phosphatidylinositol glycan, class B</b>                   | PIGB     | <b>1.0</b> | <b>1.0</b> | <b>1.8</b> | <b>2.1</b> |
| phosphatidylinositol glycan, class B                          | PIGB     | <b>1.0</b> | 0.7        | <b>1.6</b> | <b>2.4</b> |
| phosphoenolpyruvate carboxykinase 2 (mitochondrial)           | PCK2     | 0.5        | 0.7        | 0.9        | <b>2.0</b> |
| phosphoserine aminotransferase 1                              | PSAT1    | 0.3        | 0.7        | <b>2.0</b> | <b>2.1</b> |
| phosphoserine aminotransferase 1                              | PSAT1    | 0.3        | 0.7        | <b>1.7</b> | <b>2.0</b> |
| phosphoserine phosphatase                                     | PSPH     | 0.5        | 0.5        | 0.5        | 0.8        |
| phosphotriesterase related                                    | PTER     | 0.9        | 0.9        | 0.6        | 0.9        |
| <b>pirin (iron-binding nuclear protein)</b>                   | PIR      | <b>1.6</b> | <b>2.4</b> | <b>1.4</b> | <b>1.5</b> |
| presenilin 1 (Alzheimer disease 3)                            | PSEN1    | 0.4        | 0.6        | 0.4        | 0.7        |
| prion protein (p27-30)                                        | PRNP     | 0.8        | 0.4        | 0.5        | <b>1.5</b> |
| prion protein (p27-30)                                        | PRNP     | 0.5        | 0.4        | 0.6        | <b>1.0</b> |
| programmed cell death 4 (neoplastic transformation inhibitor) | PDCD4    | 0.6        | <b>1.3</b> | 0.3        | <b>1.9</b> |
| prosaposin                                                    | PSAP     | 0.3        | 0.6        | 0.9        | <b>1.1</b> |
| protein kinase C binding protein 1                            | PRKCBP1  | 0.4        | 0.6        | 0.7        | 0.6        |
| protein kinase, cAMP-dependent, catalytic, beta               | PRKACB   | 0.8        | 0.8        | 0.4        | <b>1.9</b> |
| protein kinase, cAMP-dependent, catalytic, beta               | PRKACB   | 0.6        | <b>1.1</b> | 0.4        | <b>1.5</b> |
| RAB GTPase activating protein 1                               | RABGAP1  | 0.4        | 0.6        | 0.5        | 0.5        |
| RAB GTPase activating protein 1-like                          | RABGAP1L | 0.6        | <b>4.1</b> | 0.6        | <b>1.0</b> |
| RAB10, member RAS oncogene family                             | RAB10    | 0.5        | 0.5        | 0.4        | 0.4        |
| RAP2B, member of RAS oncogene family                          | RAP2B    | 0.7        | 0.6        | 0.3        | 0.7        |
| RAS and EF hand domain containing                             | RASEF    | 0.7        | <b>1.1</b> | 0.4        | <b>2.2</b> |
| regulating synaptic membrane exocytosis 3                     | RIMS3    | <b>1.5</b> | <b>1.5</b> | 0.6        | <b>1.2</b> |
| restin                                                        | RSN      | 0.8        | 0.6        | 0.5        | <b>1.4</b> |
| Retinoblastoma-associated factor 600                          | RBAF600  | 0.5        | 0.8        | 0.7        | <b>1.0</b> |
| Ribosomal protein S24                                         | RPS24    | <b>1.1</b> | <b>1.4</b> | 0.7        | 0.8        |
| ribosomal protein S6 kinase, 52kDa, polypeptide 1             | RPS6KC1  | 0.5        | 0.5        | 0.9        | <b>1.3</b> |
| ring finger and KH domain containing 2                        | RKHD2    | <b>1.2</b> | 0.9        | 0.5        | 0.5        |
| ring finger protein 153                                       | RNF153   | 0.5        | <b>1.1</b> | 0.5        | <b>1.0</b> |
| RIO kinase 3 (yeast) /// RIO kinase 3 (yeast)                 | RIOK3    | 0.8        | 0.7        | 0.6        | 0.9        |
| RIO kinase 3 (yeast) /// RIO kinase 3 (yeast)                 | RIOK3    | 0.7        | 0.7        | 0.5        | 0.8        |
| RIO kinase 3 (yeast) /// RIO kinase 3 (yeast)                 | RIOK3    | 0.6        | 0.9        | 0.4        | 0.6        |
| S100 calcium binding protein A6 (calyculin)                   | S100A6   | 0.9        | <b>1.6</b> | 0.5        | <b>1.9</b> |
| <b>sequestosome 1</b>                                         | SQSTM1   | <b>2.5</b> | <b>3.3</b> | <b>2.1</b> | <b>5.1</b> |
| sequestosome 1                                                | SQSTM1   | 0.9        | <b>1.8</b> | <b>1.7</b> | <b>2.6</b> |
| Ser/Thr-like kinase                                           | MGC4796  | <b>1.2</b> | <b>1.0</b> | 0.4        | <b>1.2</b> |
| Serine hydroxymethyltransferase 1 (soluble)                   | SHMT1    | <b>1.1</b> | <b>1.3</b> | 0.5        | <b>1.0</b> |
| Serine hydroxymethyltransferase 1 (soluble)                   | SHMT1    | 0.9        | <b>1.0</b> | 0.5        | <b>1.0</b> |
| serine/threonine kinase 17a (apoptosis-inducing)              | STK17A   | 0.3        | <b>1.7</b> | 0.4        | <b>1.0</b> |

|                                                               |           |            |            |            |            |
|---------------------------------------------------------------|-----------|------------|------------|------------|------------|
| seryl-tRNA synthetase                                         | SARS      | 0.5        | 0.7        | <b>1.1</b> | <b>1.2</b> |
| sestrin 2                                                     | SESN2     | 0.9        | <b>1.3</b> | <b>2.1</b> | <b>2.8</b> |
| sestrin 2                                                     | SESN2     | 0.8        | <b>1.3</b> | <b>1.9</b> | <b>3.1</b> |
| SHC (Src homology 2 domain containing)                        | SHC1      | 0.6        | 0.6        | 0.4        | 0.5        |
| transforming protein 1                                        |           |            |            |            |            |
| similar to hypothetical protein FLJ10883                      | LOC115294 | 0.4        | 0.8        | 0.4        | <b>1.0</b> |
| similar to KIAA0592 protein                                   | LOC387680 | <b>1.0</b> | <b>1.1</b> | 0.5        | <b>1.5</b> |
| similar to KIAA0592 protein /// hypothetical protein FLJ10824 | FLJ10824  | 0.9        | <b>1.0</b> | 0.4        | <b>1.7</b> |
| solute carrier family 3, member 2                             | SLC3A2    | <b>1.0</b> | 0.8        | 0.8        | <b>1.3</b> |
| solute carrier family 30 (zinc transporter), member 1         | SLC30A1   | <b>2.6</b> | <b>1.2</b> | 0.7        | <b>1.0</b> |
| Solute carrier family 30 (zinc transporter), member 1         | SLC30A1   | <b>2.5</b> | 0.7        | 0.9        | <b>1.2</b> |
| <b>solute carrier family 38, member 6</b>                     | SLC38A6   | <b>2.5</b> | <b>2.1</b> | <b>1.1</b> | <b>2.2</b> |
| solute carrier family 43, member 1                            | SLC43A1   | <b>1.2</b> | <b>1.1</b> | 0.8        | <b>1.1</b> |
| <b>solute carrier family 7, member 11</b>                     | SLC7A11   | <b>1.7</b> | <b>2.5</b> | <b>2.7</b> | <b>4.2</b> |
| <b>solute carrier family 7, member 11</b>                     | SLC7A11   | <b>1.6</b> | <b>2.5</b> | <b>2.5</b> | <b>3.4</b> |
| <b>solute carrier family 7, member 11</b>                     | SLC7A11   | <b>1.7</b> | <b>1.2</b> | <b>1.0</b> | <b>1.5</b> |
| special AT-rich sequence binding protein 1                    | SATB1     | <b>2.9</b> | 0.9        | 0.6        | <b>1.9</b> |
| spermidine/spermine N1-acetyltransferase                      | SAT       | 0.9        | <b>1.4</b> | <b>1.4</b> | <b>2.2</b> |
| spermidine/spermine N1-acetyltransferase                      | SAT       | 0.7        | <b>1.3</b> | <b>1.1</b> | <b>2.0</b> |
| sulfatase modifying factor 1                                  | SUMF1     | 0.9        | <b>1.0</b> | 0.7        | <b>1.1</b> |
| suppressor of hairy wing homolog 3 (Drosophila)               | SUHW3     | <b>1.2</b> | <b>1.1</b> | 0.8        | 0.8        |
| <b>synaptotagmin-like 1</b>                                   | SYTL1     | <b>1.0</b> | <b>1.0</b> | <b>1.0</b> | <b>2.1</b> |
| syndecan binding protein (syntenin)                           | SDCBP     | 0.6        | 0.6        | 0.8        | <b>1.5</b> |
| syntaxin 3A                                                   | STX3A     | <b>1.4</b> | <b>1.0</b> | 0.6        | <b>1.2</b> |
| syntaxin 4A (placental)                                       | STX4A     | 0.9        | 0.9        | 0.4        | 0.6        |
| Tax1 (human T-cell leukemia virus type I) binding protein 1   | TAX1BP1   | 0.5        | 0.8        | 0.4        | <b>1.4</b> |
| testis derived transcript (3 LIM domains)                     | TES       | 0.4        | 0.8        | <b>1.2</b> | <b>1.4</b> |
| testis derived transcript (3 LIM domains)                     | TES       | 0.5        | 0.6        | <b>1.0</b> | <b>1.4</b> |
| tetratricopeptide repeat domain 14                            | TTC14     | <b>1.2</b> | <b>1.0</b> | 0.9        | <b>1.0</b> |
| thioredoxin                                                   | TXN       | 0.7        | 0.8        | 0.4        | <b>1.0</b> |
| <b>tribbles homolog 3 (Drosophila)</b>                        | TRIB3     | <b>1.2</b> | <b>1.2</b> | <b>1.5</b> | <b>2.6</b> |
| tribbles homolog 3 (Drosophila)                               | TRIB3     | 0.9        | <b>1.0</b> | <b>1.4</b> | <b>1.8</b> |
| tryptophanyl-tRNA synthetase                                  | WARS      | 0.5        | 0.7        | 0.5        | <b>1.6</b> |
| tubulin, alpha 3                                              | TUBA3     | 0.4        | <b>1.6</b> | 0.4        | <b>1.8</b> |
| tubulin, epsilon 1                                            | TUBE1     | 0.4        | 0.5        | <b>1.6</b> | <b>1.4</b> |
| tumor differentially expressed 1                              | TDE1      | 0.3        | 0.4        | 0.5        | 0.8        |
| tumor differentially expressed 2                              | TDE2      | 0.6        | 0.6        | 0.7        | <b>1.1</b> |
| tumor necrosis factor receptor superfamily, member 6          | TNFRSF6   | 0.5        | <b>1.4</b> | 0.6        | 0.5        |
| ubiquitin specific protease 11                                | USP11     | 0.6        | <b>1.0</b> | 0.5        | 0.7        |
| ubiquitination factor E4B (UFD2 homolog, yeast)               | UBE4B     | 0.5        | 0.5        | 0.4        | 0.8        |
| vacuolar protein sorting 26 (yeast)                           | VPS26     | 0.8        | 0.7        | 0.5        | <b>1.5</b> |
| vacuolar protein sorting 4B (yeast)                           | VPS4B     | 0.4        | 0.5        | 0.4        | 0.6        |
| v-maf musculoaponeurotic fibrosarcoma oncogene homolog G      | MAFG      | <b>1.0</b> | <b>1.3</b> | 0.5        | <b>1.3</b> |
| YTH domain family 3                                           | YTHDF3    | 0.9        | 0.5        | 0.4        | 0.6        |
| zinc finger protein 226                                       | ZNF226    | 0.7        | 0.8        | 0.4        | 0.8        |
| zinc finger protein 258                                       | ZNF258    | 0.6        | 0.9        | 0.4        | 0.7        |
| zinc finger protein 304                                       | ZNF304    | 0.9        | 0.8        | 0.6        | 0.6        |

|                                        |         |     |            |            |            |
|----------------------------------------|---------|-----|------------|------------|------------|
| Zinc finger, BED domain containing 3   | ZBED3   | 0.7 | <b>2.2</b> | <b>2.3</b> | <b>1.5</b> |
| zinc finger, FYVE domain containing 26 | ZFYVE26 | 0.7 | 0.5        | 0.8        | 0.4        |

**Supplemental Table - 2**

**LogRatios for down-regulated genes at 6 h in all cell lines**

**Two-fold changes are in green bold**

| Gene Descriptor                                                                   | Symbol        | U266        | MM.1s       | 8226/S      | KMS11       |
|-----------------------------------------------------------------------------------|---------------|-------------|-------------|-------------|-------------|
|                                                                                   |               | 6h          | 6h          | 6h          | 6h          |
| 3-hydroxy-3-methylglutaryl-Coenzyme A reductase                                   | HMGCR         | <b>-1.7</b> | <b>-1.0</b> | -0.3        | -0.7        |
| 3-hydroxy-3-methylglutaryl-Coenzyme A synthase 1 (soluble)                        | HMGCS1        | <b>-1.5</b> | <b>-1.8</b> | -0.3        | <b>-1.0</b> |
| 3-hydroxy-3-methylglutaryl-Coenzyme A synthase 1 (soluble)                        | HMGCS1        | <b>-1.6</b> | <b>-1.4</b> | -0.4        | -0.9        |
| 7-dehydrocholesterol reductase                                                    | DHCR7         | -0.5        | <b>-1.6</b> | -0.3        | -0.5        |
| a disintegrin and metalloproteinase domain 10                                     | ADAM10        | -0.5        | -0.8        | -0.3        | -0.8        |
| a disintegrin and metalloproteinase domain 10                                     | ADAM10        | -0.4        | -0.7        | -0.3        | -0.7        |
| acyl-CoA synthetase long-chain family member 4                                    | ACSL4         | -0.4        | -0.7        | -0.6        | -0.8        |
| adaptor protein with pleckstrin homology and src homology 2 domains               | APS           | <b>-1.1</b> | <b>-1.3</b> | -0.7        | <b>-1.2</b> |
| adenylate kinase 3                                                                | AK3           | <b>-1.5</b> | <b>-1.5</b> | -0.5        | <b>-1.0</b> |
| Aminoacylase 1-like 2                                                             | ACY1L2        | <b>-1.0</b> | <b>-1.6</b> | -0.7        | <b>-1.3</b> |
| Aminoacylase 1-like 2                                                             | ACY1L2        | -0.7        | <b>-1.1</b> | -0.7        | <b>-1.0</b> |
| arginine-rich, mutated in early stage tumors                                      | ARMET         | -0.4        | -0.6        | -0.5        | <b>-1.0</b> |
| AT rich interactive domain 5A (MRF1-like)                                         | ARID5A        | -0.5        | -0.4        | -0.6        | -0.7        |
| ATP citrate lyase                                                                 | ACLY          | -0.4        | <b>-1.0</b> | -0.6        | -0.7        |
| ATP citrate lyase                                                                 | ACLY          | -0.3        | -0.9        | -0.4        | -0.6        |
| ATPase type 13A                                                                   | ATP13A        | -0.3        | -0.4        | -0.3        | -0.6        |
| ATPase, Class I, type 8B, member 2                                                | ATP8B2        | -0.5        | -0.8        | -0.6        | <b>-1.1</b> |
| barren homolog (Drosophila)                                                       | BRRN1         | -0.5        | -0.7        | -0.4        | -0.4        |
| BCL2-like 1                                                                       | BCL2L1        | <b>-1.2</b> | -0.6        | -0.6        | <b>-1.6</b> |
| BCL2-like 1                                                                       | BCL2L1        | <b>-1.2</b> | -0.6        | -0.5        | <b>-1.4</b> |
| BCL2-like 1 /// BCL2-like 1                                                       | BCL2L1        | <b>-1.0</b> | -0.8        | -0.3        | <b>-1.3</b> |
| BUB1 budding uninhibited by benzimidazoles 1 homolog (yeast)                      | BUB1          | -0.8        | -0.5        | -0.3        | -0.7        |
| <b>Butyrophilin, subfamily 3, member A2</b>                                       | <b>BTN3A2</b> | <b>-1.1</b> | <b>-1.1</b> | -1.2        | -1.2        |
| butyrophilin, subfamily 3, member A2                                              | BTN3A2        | <b>-1.0</b> | -0.8        | <b>-1.0</b> | <b>-1.5</b> |
| butyrophilin, subfamily 3, member A3                                              | BTN3A3        | -0.9        | -0.7        | -0.9        | <b>-1.6</b> |
| carbohydrate (chondroitin 4) sulfotransferase 12                                  | CHST12        | <b>-1.5</b> | <b>-1.4</b> | -0.4        | <b>-1.3</b> |
| carbohydrate (chondroitin) synthase 1                                             | CHSY1         | -0.7        | <b>-1.0</b> | -0.4        | -0.7        |
| casein kinase 1, epsilon                                                          | CSNK1E        | -0.7        | -0.9        | -0.6        | <b>-1.0</b> |
| caveolin 1, caveolae protein, 22kDa                                               | CAV1          | -0.8        | <b>-1.0</b> | -0.6        | -0.7        |
| caveolin 1, caveolae protein, 22kDa                                               | CAV1          | -0.7        | -0.9        | -0.6        | -0.7        |
| Cbp/p300-interacting transactivator, with Glu/Asp-rich carboxy-terminal domain, 2 | CITED2        | -0.7        | <b>-1.0</b> | <b>-1.6</b> | <b>-1.2</b> |
| Cbp/p300-interacting transactivator, with Glu/Asp-rich carboxy-terminal domain, 2 | CITED2        | -0.6        | -0.7        | <b>-1.3</b> | <b>-1.1</b> |
| CDC20 cell division cycle 20 homolog (S. cerevisiae)                              | CDC20         | -0.5        | -0.6        | -0.4        | -0.7        |
| ceroid-lipofuscinosis, neuronal 6, late infantile, variant                        | CLN6          | -0.3        | -0.9        | -0.3        | -0.5        |

|                                                                  |               |             |             |             |             |
|------------------------------------------------------------------|---------------|-------------|-------------|-------------|-------------|
| chemokine (C-C motif) receptor 1                                 | CCR1          | -0.9        | -0.7        | -0.5        | <b>-1.6</b> |
| chemokine (C-C motif) receptor 1                                 | CCR1          | <b>-1.1</b> | -0.6        | -0.6        | <b>-1.5</b> |
| chromosome 12 open reading frame 14                              | C12orf14      | -0.4        | <b>-1.0</b> | -0.8        | <b>-1.4</b> |
| chromosome 12 open reading frame 14                              | C12orf14      | -0.4        | <b>-1.0</b> | -0.8        | <b>-1.4</b> |
| chromosome 18 open reading frame 19                              | C18orf19      | -0.5        | -0.4        | -0.3        | -0.9        |
| chromosome 20 open reading frame 30                              | C20orf30      | -0.3        | -0.2        | -0.2        | -0.3        |
| chromosome 22 open reading frame 9                               | C22orf9       | -0.6        | <b>-1.2</b> | -0.7        | <b>-1.1</b> |
| chromosome 22 open reading frame 9                               | C22orf9       | -0.5        | -0.9        | -0.4        | <b>-1.1</b> |
| chromosome 7 open reading frame 21                               | C7orf21       | -0.8        | -0.5        | -0.5        | -0.6        |
| chromosome 9 open reading frame 140                              | C9orf140      | -0.6        | <b>-1.1</b> | -0.3        | <b>-1.0</b> |
| chromosome 9 open reading frame 86                               | C9orf86       | -0.3        | -0.4        | -0.5        | -0.5        |
| CLONE=IMAGE:981825 /UG=Hs.103135 ESTs                            |               | -0.2        | <b>-1.0</b> | -0.7        | <b>-1.2</b> |
| CLONE=IMAGE:2432978 /UG=Hs.66666 ESTs                            |               | -0.4        | -0.6        | -0.6        | -0.6        |
| CLONE=IMAGE:2722673 /UG=Hs.211198 ESTs                           |               | -0.6        | -0.7        | -0.6        | -0.9        |
| CLONE=IMAGE:4657001 /UG=Hs.127264 ESTs                           |               | -0.7        | -0.9        | -0.6        | -0.8        |
| CLONE=IMAGE:4718390 /UG=Hs.40034                                 |               | -0.6        | <b>-1.6</b> | -0.8        | <b>-1.4</b> |
| integrin, alpha 4                                                |               |             |             |             |             |
| c-src tyrosine kinase                                            | CSK           | -0.6        | -0.7        | -0.5        | -0.8        |
| CSR2 binding protein                                             | CSR2BP        | -0.5        | -0.6        | -0.5        | -0.7        |
| <b>CTD, RNA polymerase II, polypeptide A small phosphatase 1</b> | <b>CTDSP1</b> | <b>-1.0</b> | <b>-1.4</b> | <b>-1.2</b> | <b>-1.3</b> |
| <b>CTD, RNA polymerase II, polypeptide A small phosphatase 2</b> | CTDSP2        | -0.4        | -0.6        | -0.4        | -0.6        |
| cyclin A2                                                        | CCNA2         | -0.7        | -0.3        | -0.3        | -0.4        |
| <b>cyclin D1 (PRAD1: parathyroid adenomatosis 1)</b>             | <b>CCND1</b>  | <b>-1.3</b> | <b>-3.0</b> | <b>-1.5</b> | <b>-2.1</b> |
| cytoskeleton-associated protein 4                                | CKAP4         | -0.4        | -0.8        | -0.3        | -0.8        |
| DEAH (Asp-Glu-Ala-His) box polypeptide 15                        | DHX15         | -0.3        | -0.7        | -0.4        | -0.7        |
| deleted in lymphocytic leukemia, 1                               | DLEU1         | -0.5        | <b>-1.1</b> | -0.9        | <b>-1.7</b> |
| deoxyhypusine synthase                                           | DHPS          | -0.5        | -0.7        | -0.3        | -0.7        |
| deoxyhypusine synthase                                           | DHPS          | -0.4        | -0.7        | -0.7        | -0.6        |
| deoxyhypusine synthase                                           | DHPS          | -0.4        | -0.7        | -0.5        | -0.6        |
| DEP domain containing 6                                          | DEPDC6        | -0.5        | <b>-1.3</b> | -0.4        | -0.7        |
| Der1-like domain family, member 3                                | DERL3         | -0.6        | -0.8        | -0.4        | <b>-1.1</b> |
| disrupter of silencing 10                                        | SAS10         | -0.6        | -0.8        | -0.7        | <b>-1.6</b> |
| DKFZP564I1171 protein                                            | DKFZP564I1171 | -0.4        | <b>-1.5</b> | -0.6        | <b>-1.1</b> |
| E2F transcription factor 5, p130-binding                         | E2F5          | -0.5        | <b>-1.2</b> | -0.7        | <b>-1.3</b> |
| ELL3030                                                          | UNQ3030       | -0.5        | -0.5        | -0.5        | <b>-1.6</b> |
| elongation of very long chain fatty acids -like 1                | ELOVL1        | -0.4        | -0.3        | -0.6        | -0.3        |
| emopamil binding protein (sterol isomerase)                      | EBP           | -0.4        | -0.8        | -0.2        | -0.3        |
| ERO1-like (S. cerevisiae)                                        | ERO1L         | -0.4        | <b>-1.1</b> | -0.4        | -0.9        |
| family with sequence similarity 46, member C                     | FAM46C        | -0.8        | -0.5        | -0.8        | <b>-1.5</b> |
| family with sequence similarity 46, member C                     | FAM46C        | -0.6        | -0.4        | -0.8        | <b>-1.5</b> |
| farnesyl-diphosphate farnesyltransferase 1                       | FDFT1         | <b>-1.3</b> | <b>-2.1</b> | -0.7        | -0.7        |
| farnesyl-diphosphate farnesyltransferase 1                       | FDFT1         | <b>-1.5</b> | <b>-2.0</b> | -0.6        | -0.7        |
| <b>fatty acid synthase</b>                                       | <b>FASN</b>   | <b>-1.2</b> | <b>-1.8</b> | <b>-1.6</b> | <b>-1.7</b> |
| flotillin 1                                                      | FLOT1         | -0.6        | -0.5        | -0.4        | -0.7        |
| flotillin 1                                                      | FLOT1         | -0.7        | -0.4        | -0.3        | -0.6        |
| forkhead box O3A                                                 | FOXO3A        | -0.7        | -0.6        | -0.7        | -0.5        |
| forkhead box O3A                                                 | FOXO3A        | -0.4        | -0.6        | -0.6        | -0.5        |
| forkhead box O3A                                                 | FOXO3A        | -0.3        | -0.5        | -0.6        | -0.5        |
| general transcription factor IIE, polypeptide 2, beta            | GTF2E2        | -0.9        | -0.5        | -0.5        | -0.3        |

|                                                      |               |             |             |             |             |
|------------------------------------------------------|---------------|-------------|-------------|-------------|-------------|
| 34kDa                                                |               |             |             |             |             |
| glucocorticoid induced transcript 1                  | GLCCI1        | -1.3        | -1.5        | -0.5        | -1.1        |
| glucocorticoid induced transcript 1                  | GLCCI1        | -1.3        | -1.4        | -0.4        | -1.2        |
| glucosidase I                                        | GCS1          | -0.4        | -0.7        | -0.6        | -1.2        |
| glutaminase                                          | GLS           | -0.3        | -0.5        | -0.5        | -0.4        |
| glutaminase                                          | GLS           | -0.4        | -0.4        | -0.3        | -0.5        |
| glycosyltransferase 25 domain containing 1           | GLT25D1       | -0.6        | -0.7        | -0.4        | -0.9        |
| glycosyltransferase AD-017                           | AD-017        | -0.9        | -1.9        | -0.5        | -0.8        |
| GTP binding protein 3 (mitochondrial)                | GTPBP3        | -0.4        | -0.4        | -0.4        | -0.8        |
| guanine monphosphate synthetase                      | GMPS          | -0.6        | -0.8        | -0.4        | -0.4        |
| H1 histone family, member X                          | H1FX          | -0.7        | -1.2        | -0.8        | -0.3        |
| heterogeneous nuclear ribonucleoprotein D-like       | HNRPDL        | -0.3        | -1.0        | -0.6        | -0.6        |
| heterogeneous nuclear ribonucleoprotein D-like       | HNRPDL        | -0.3        | -0.9        | -0.4        | -0.5        |
| heterogeneous nuclear ribonucleoprotein H3 (2H9)     | HNRPH3        | -0.4        | -0.4        | -0.6        | -0.6        |
| heterogeneous nuclear ribonucleoprotein H3 (2H9)     | HNRPH3        | -0.4        | -0.4        | -0.4        | -0.5        |
| hexokinase 2                                         | HK2           | -2.7        | -1.6        | -0.9        | -2.7        |
| high mobility group nucleosomal binding domain 4     | HMGN4         | -0.2        | -0.4        | -0.4        | -0.7        |
| high-mobility group 20B                              | HMG20B        | -0.5        | -0.9        | -0.3        | -0.6        |
| histone deacetylase 9                                | HDAC9         | -0.4        | -2.5        | -0.9        | -0.9        |
| HMT1 hnRNP methyltransferase-like 2 (S. cerevisiae)  | HRMT1L2       | -0.2        | -0.6        | -0.3        | -0.7        |
| Homo sapiens, clone IMAGE:3894337, mRNA              |               | -0.3        | -0.7        | -0.6        | -0.8        |
| Homo sapiens, clone IMAGE:5274897, mRNA              |               | -0.5        | -0.8        | -0.5        | -0.7        |
| Hypothetical LOC389362                               |               | -0.4        | -0.8        | -0.7        | -1.0        |
| hypothetical protein BC007882                        | LOC152217     | -0.3        | -0.5        | -0.6        | -0.9        |
| hypothetical protein FLJ10656                        | P15RS         | -0.3        | -0.5        | -0.5        | -0.8        |
| hypothetical protein FLJ11164                        | FLJ11164      | -0.4        | -0.3        | -0.4        | -0.9        |
| hypothetical protein FLJ35036                        | FLJ35036      | -0.9        | -1.2        | -0.7        | -0.6        |
| Hypothetical protein FLJ35036                        | FLJ35036      | -0.8        | -0.7        | -0.7        | -0.7        |
| hypothetical protein FLJ35036                        | FLJ35036      | -0.5        | -0.6        | -0.8        | -0.7        |
| hypothetical protein LOC202781                       | LOC202781     | -0.4        | -1.3        | -0.5        | -0.9        |
| hypothetical protein LOC221362                       | LOC221362     | -0.9        | -1.1        | -0.9        | -1.1        |
| hypothetical protein LOC286167                       | LOC286167     | -0.9        | -0.5        | -0.6        | -0.5        |
| hypothetical protein LOC339287                       | LOC339287     | -0.6        | -1.1        | -0.6        | -0.6        |
| hypothetical protein LOC51061                        | LOC51061      | -0.4        | -1.1        | -0.6        | -0.6        |
| hypothetical protein MGC15416                        | MGC15416      | -0.2        | -1.0        | -0.6        | -0.9        |
| hypothetical protein MGC22793                        | MGC22793      | -0.7        | -1.4        | -0.5        | -1.3        |
| hypothetical protein MGC3196                         | MGC3196       | -0.3        | -0.7        | -0.3        | -1.1        |
| hypothetical protein MGC4172                         | MGC4172       | -0.7        | -1.6        | -0.7        | -0.9        |
| hypoxia-inducible protein 2                          | HIG2          | -0.8        | -0.9        | -0.3        | -1.0        |
| Inositol polyphosphate-4-phosphatase, type I, 107kDa | INPP4A        | -0.7        | -1.0        | -0.4        | -0.8        |
| Inositol polyphosphate-4-phosphatase, type I, 107kDa | INPP4A        | -0.6        | -1.0        | -0.3        | -0.7        |
| <b>insulin induced gene 1</b>                        | <b>INSIG1</b> | <b>-2.0</b> | <b>-2.6</b> | <b>-1.3</b> | <b>-1.2</b> |
| <b>insulin induced gene 1</b>                        | <b>INSIG1</b> | <b>-1.9</b> | <b>-2.6</b> | <b>-1.2</b> | <b>-1.3</b> |
| insulin induced gene 1                               | INSIG1        | -1.6        | -2.1        | -0.8        | -1.2        |
| interferon regulatory factor 2                       | IRF2          | -0.4        | -0.8        | -0.6        | -1.3        |
| interferon regulatory factor 4                       | IRF4          | -0.9        | -1.5        | -0.8        | -1.4        |
| <b>interferon regulatory factor 4</b>                | <b>IRF4</b>   | <b>-1.0</b> | <b>-1.4</b> | <b>-1.0</b> | <b>-1.8</b> |
| ischemia/reperfusion inducible protein               | FLJ23476      | -0.4        | -0.6        | -0.4        | -1.3        |
| ischemia/reperfusion inducible protein               | FLJ23476      | -0.3        | -0.6        | -0.7        | -1.5        |

|                                                             |               |             |             |             |             |
|-------------------------------------------------------------|---------------|-------------|-------------|-------------|-------------|
| isopentenyl-diphosphate delta isomerase                     | IDI1          | -1.7        | -1.8        | -0.6        | -1.0        |
| isopentenyl-diphosphate delta isomerase                     | IDI1          | -1.6        | -1.7        | -0.6        | -1.0        |
| KIAA0186 gene product                                       | KIAA0186      | -0.5        | -0.6        | -0.3        | -0.5        |
| KIAA0877 protein                                            | KIAA0877      | -0.5        | -0.6        | -0.4        | -0.4        |
| KIAA1196 protein                                            | KIAA1196      | -0.3        | -0.9        | -0.4        | -1.0        |
| Kruppel-like factor 16                                      | KLF16         | -1.3        | -0.6        | -1.8        | -3.0        |
| lanosterol synthase (2,3-oxidosqualene-lanosterol cyclase)  | LSS           | -0.6        | -2.3        | -0.7        | -0.8        |
| lanosterol synthase (2,3-oxidosqualene-lanosterol cyclase)  | LSS           | -0.6        | -2.0        | -0.5        | -0.7        |
| likely ortholog of yeast ARV1                               | ARV1          | -0.6        | -0.8        | -0.4        | -0.6        |
| <b>low density lipoprotein receptor</b>                     | <b>LDLR</b>   | <b>-2.2</b> | <b>-2.8</b> | <b>-1.0</b> | <b>-2.1</b> |
| low density lipoprotein receptor                            | LDLR          | -2.5        | -2.3        | -0.7        | -2.0        |
| low density lipoprotein receptor                            | LDLR          | -2.5        | -2.3        | -0.8        | -1.3        |
| MAD2 mitotic arrest deficient-like 1 (yeast)                | MAD2L1        | -0.5        | -0.6        | -0.7        | -0.8        |
| MAD2 mitotic arrest deficient-like 1 (yeast)                | MAD2L1        | -0.3        | -0.6        | -0.5        | -0.6        |
| MADS box transcription enhancer factor 2, polypeptide C     | MEF2C         | -0.8        | -0.5        | -0.6        | -0.8        |
| mannosidase, alpha, class 2A, member 1                      | MAN2A1        | -0.4        | -0.9        | -0.4        | -1.0        |
| mannosidase, alpha, class 2A, member 1                      | MAN2A1        | -0.2        | -0.8        | -0.5        | -1.0        |
| MCM7 minichromosome maintenance deficient 7 (S. cerevisiae) | MCM7          | -0.9        | -1.4        | -0.6        | -0.7        |
| MCM7 minichromosome maintenance deficient 7 (S. cerevisiae) | MCM7          | -0.8        | -1.3        | -0.4        | -0.6        |
| CD46, trophoblast-lymphocyte cross-reactive antigen         | MCP           | -0.4        | -0.5        | -0.3        | -0.5        |
| metastasis associated 1 /// metastasis associated 1         | MTA1          | -0.3        | -1.3        | -0.6        | -0.9        |
| MID1 interacting protein 1, gastrulation specific G12-like  | MID1IP1       | -0.5        | -0.8        | -0.6        | -0.3        |
| minor histocompatibility antigen HA-1                       | HA-1          | -0.7        | -0.4        | -0.9        | -1.0        |
| mitochondrial isoleucine tRNA synthetase                    | FLJ10326      | -0.4        | -0.8        | -0.2        | -0.7        |
| mitochondrial ribosomal protein 63                          | MRP63         | -0.3        | -0.5        | -0.4        | -0.5        |
| mitochondrial ribosomal protein L34                         | MRPL34        | -0.4        | -0.5        | -0.5        | -1.1        |
| mitogen-activated protein kinase kinase kinase 1            | MAP4K1        | -0.6        | -0.9        | -0.8        | -0.8        |
| mitogen-activated protein kinase kinase kinase 1            | MAP4K1        | -0.5        | -0.9        | -0.5        | -0.7        |
| MRNA; cDNA DKFZp564C0762 (from clone DKFZp564C0762)         |               | -0.4        | -0.7        | -0.6        | -1.2        |
| N-acylaminoacyl-peptide hydrolase                           | APEH          | -0.5        | -0.9        | -0.5        | -0.7        |
| NAD(P) dependent steroid dehydrogenase-like                 | NSDHL         | -0.7        | -0.6        | -0.7        | -0.7        |
| NAD(P) dependent steroid dehydrogenase-like                 | NSDHL         | -0.8        | -0.4        | -0.4        | -0.5        |
| nuclear autoantigenic sperm protein (histone-binding)       | NASP          | -0.5        | -0.6        | -0.3        | -0.5        |
| nuclear factor (erythroid-derived 2)-like 3                 | NFE2L3        | -0.7        | -1.0        | -0.4        | -1.9        |
| nuclear protein E3-3                                        | DKFZP564J0123 | -0.3        | -0.4        | -0.3        | -0.5        |
| nucleoporin 210                                             | NUP210        | -1.2        | -0.5        | -0.4        | -0.8        |
| nucleoporin 210                                             | NUP210        | -0.9        | -0.5        | -0.3        | -0.8        |
| nucleoporin 88kDa                                           | NUP88         | -0.4        | -0.3        | -0.3        | -0.4        |
| opioid receptor, sigma 1                                    | OPRS1         | -0.2        | -0.9        | -0.2        | -0.6        |
| opioid receptor, sigma 1                                    | OPRS1         | -0.4        | -0.7        | -0.6        | -0.9        |
| opsin 3 (encephalopsin, panopsin)                           | OPN3          | -0.6        | -1.3        | -0.6        | -1.3        |
| opsin 3 (encephalopsin, panopsin)                           | OPN3          | -1.0        | -1.3        | -0.5        | -1.6        |



|                                                                   |             |             |             |      |             |
|-------------------------------------------------------------------|-------------|-------------|-------------|------|-------------|
| oxidation resistance 1                                            | OXR1        | -0.5        | <b>-1.1</b> | -0.5 | -0.6        |
| oxidation resistance 1                                            | OXR1        | -0.4        | <b>-1.0</b> | -0.4 | -0.6        |
| oxidative-stress responsive 1                                     | OSR1        | -0.5        | -0.5        | -0.3 | -0.4        |
| PAI-1 mRNA-binding protein                                        | PAI-RBP1    | -0.2        | -0.3        | -0.4 | -0.5        |
| PALM2-AKAP2 protein                                               | PALM2-AKAP2 | <b>-1.2</b> | <b>-1.7</b> | -0.5 | <b>-1.1</b> |
| PALM2-AKAP2 protein                                               | PALM2-AKAP2 | <b>-1.0</b> | <b>-1.5</b> | -0.6 | <b>-1.2</b> |
| PALM2-AKAP2 protein                                               | PALM2-AKAP2 | <b>-1.1</b> | <b>-1.4</b> | -0.7 | <b>-1.2</b> |
| Pantothenate kinase 3                                             | PANK3       | -0.8        | -0.8        | -0.3 | <b>-1.0</b> |
| PAX transcription activation domain interacting protein 1 like    | PAXIP1L     | -0.7        | <b>-1.1</b> | -0.7 | -0.8        |
| phosphatidylinositol glycan, class F                              | PIGF        | -0.5        | <b>-1.2</b> | -0.4 | -0.8        |
| phosphoribosyl pyrophosphate synthetase 2                         | PRPS2       | -0.3        | -0.8        | -0.4 | -0.7        |
| phosphoribosylaminoimidazole carboxylase                          | PAICS       | -0.5        | -0.7        | -0.4 | -0.8        |
| phosphoribosylaminoimidazole carboxylase                          | PAICS       | -0.4        | -0.7        | -0.5 | -0.7        |
| pim-2 oncogene                                                    | PIM2        | -0.4        | -0.3        | -0.8 | <b>-1.0</b> |
| plakophilin 2                                                     | PKP2        | <b>-1.3</b> | <b>-1.5</b> | -0.9 | <b>-1.1</b> |
| plakophilin 4                                                     | PKP4        | -0.3        | -0.5        | -0.3 | -0.4        |
| PMS1 postmeiotic segregation increased 1 ( <i>S. cerevisiae</i> ) | PMS1        | -0.5        | -0.7        | -0.5 | <b>-1.0</b> |
| poly(A) binding protein, cytoplasmic 4 (inducible form)           | PABPC4      | -0.5        | <b>-1.1</b> | -0.3 | -0.6        |
| polymerase (RNA) I polypeptide D, 16kDa                           | POLR1D      | -0.4        | -0.9        | -0.4 | -0.5        |
| polymerase (RNA) II (DNA directed) polypeptide H                  | POLR2H      | -0.4        | -0.7        | -0.5 | <b>-1.0</b> |
| PR domain containing 1, with ZNF domain                           | PRDM1       | <b>-1.0</b> | -0.8        | -0.4 | <b>-1.0</b> |
| presenilin 2 (Alzheimer disease 4)                                | PSEN2       | -0.6        | -0.7        | -0.3 | -0.6        |
| protease, serine, 7 (enterokinase)                                | PRSS7       | <b>-1.1</b> | <b>-3.7</b> | -0.9 | <b>-1.1</b> |
| proteasome (prosome, macropain) subunit, beta type, 8             | PSMB8       | <b>-1.4</b> | <b>-2.0</b> | -0.7 | <b>-1.5</b> |
| proteasome (prosome, macropain) subunit, beta type, 8             | PSMB8       | <b>-2.4</b> | <b>-1.4</b> | -0.8 | <b>-1.4</b> |
| protein phosphatase 1, catalytic subunit, gamma isoform           | PPP1CC      | -0.2        | -0.5        | -0.2 | -0.5        |
| protein phosphatase 2 (formerly 2A), regulatory subunit B (PR 52) | PPP2R2A     | -0.6        | -0.6        | -0.4 | -0.6        |
| protein predicted by clone 23733                                  | HSU79274    | -0.6        | -0.5        | -0.4 | <b>-1.2</b> |
| protein tyrosine phosphatase type IVA, member 3                   | PTP4A3      | <b>-1.1</b> | -0.3        | -0.6 | <b>-1.5</b> |
| PTK2B protein tyrosine kinase 2 beta                              | PTK2B       | <b>-1.0</b> | <b>-1.0</b> | -0.7 | <b>-1.2</b> |
| purinergic receptor P2X, ligand-gated ion channel, 7              | P2RX7       | -0.8        | <b>-2.1</b> | -0.4 | -0.8        |
| RAD50 homolog ( <i>S. cerevisiae</i> )                            | RAD50       | -0.3        | -0.6        | -0.4 | -0.6        |
| RAS p21 protein activator 4                                       | RASA4       | -0.8        | <b>-1.1</b> | -0.3 | <b>-1.0</b> |
| ras-related C3 botulinum toxin substrate 2                        | RAC2        | <b>-1.0</b> | -0.8        | -0.9 | <b>-1.1</b> |
| ras-related C3 botulinum toxin substrate 2                        | RAC2        | -0.7        | -0.5        | -0.5 | -0.7        |
| regulator of G-protein signalling 19                              | RGS19       | -0.8        | <b>-1.0</b> | -0.4 | <b>-1.6</b> |
| retinoic acid receptor, alpha                                     | RARA        | -0.8        | -0.9        | -0.6 | -0.8        |
| Rho GDP dissociation inhibitor (GDI) alpha                        | ARHGDI1A    | -0.3        | -0.3        | -0.4 | -0.3        |
| Rho GTPase activating protein 4                                   | ARHGAP4     | -0.5        | -0.3        | -0.4 | -0.6        |
| Rho guanine nucleotide exchange factor (GEF) 3                    | ARHGEF3     | -0.8        | -0.6        | -0.5 | -0.9        |
| rho/rac guanine nucleotide exchange factor (GEF) 2                | ARHGEF2     | -0.6        | -0.5        | -0.7 | -0.5        |

|                                                             |               |             |             |             |             |
|-------------------------------------------------------------|---------------|-------------|-------------|-------------|-------------|
| ribosomal protein L10                                       | RPL10         | -0.9        | -0.8        | -0.6        | -0.8        |
| SAM domain and HD domain 1                                  | SAMHD1        | -0.9        | -0.8        | -0.4        | -0.4        |
| SAM domain and HD domain 1                                  | SAMHD1        | -0.5        | -0.7        | -0.6        | -0.6        |
| scribbled homolog (Drosophila)                              | SCRIB         | -0.3        | -0.6        | -0.6        | -0.7        |
| serologically defined colon cancer antigen 3                | SDCCAG3       | -0.6        | <b>-1.1</b> | -0.9        | <b>-1.5</b> |
| sialyltransferase 8D (alpha-2, 8-polysialyltransferase)     | SIAT8D        | -0.5        | <b>-1.5</b> | -0.4        | -0.9        |
| sialyltransferase 8D (alpha-2, 8-polysialyltransferase)     | SIAT8D        | -0.5        | <b>-1.3</b> | -0.4        | <b>-1.3</b> |
| similar to cyclin-E binding protein 1 (H. sapiens)          | MGC14386      | -0.3        | -0.5        | -0.4        | -0.5        |
| similar to ribosomal protein L22                            | LOC200916     | -0.2        | -0.4        | -0.4        | -0.5        |
| Similar to SRR1-like protein                                |               | -0.5        | -0.4        | -0.4        | <b>-1.0</b> |
| Similar to TSG118.1                                         |               | -0.4        | -0.3        | -0.7        | <b>-1.1</b> |
| small nuclear ribonucleoprotein polypeptide A'              | SNRPA1        | -0.2        | -0.2        | -0.6        | -0.6        |
| small optic lobes homolog (Drosophila)                      | SOLH          | -0.4        | -0.7        | -0.8        | <b>-1.1</b> |
| solute carrier family 25, member 11                         | SLC25A11      | -0.4        | -0.7        | -0.5        | -0.7        |
| solute carrier family 25, member 11                         | SLC25A11      | -0.3        | -0.5        | -0.5        | -0.7        |
| solute carrier family 29, member 1                          | SLC29A1       | -0.6        | -0.9        | -0.6        | <b>-1.0</b> |
| solute carrier family 29, member 1                          | SLC29A1       | -0.4        | -0.9        | -0.8        | <b>-1.0</b> |
| solute carrier family 35, member B2                         | SLC35B2       | -0.5        | -0.9        | <b>-1.0</b> | <b>-1.0</b> |
| <b>squalene epoxidase</b>                                   | <b>SQLE</b>   | <b>-1.4</b> | <b>-2.6</b> | <b>-1.2</b> | <b>-1.1</b> |
| squalene epoxidase                                          | SQLE          | <b>-1.1</b> | <b>-1.4</b> | -0.7        | -0.9        |
| stearoyl-CoA desaturase (delta-9-desaturase)                | SCD           | -0.7        | <b>-2.7</b> | -0.4        | -0.7        |
| stearoyl-CoA desaturase (delta-9-desaturase)                | SCD           | -0.9        | <b>-2.5</b> | -0.5        | -0.7        |
| stearoyl-CoA desaturase (delta-9-desaturase)                | SCD           | -0.7        | <b>-2.2</b> | -0.5        | -0.6        |
| stearoyl-CoA desaturase (delta-9-desaturase)                | SCD           | <b>-1.0</b> | <b>-2.4</b> | -0.4        | -0.6        |
| sterol regulatory element binding transcription factor 2    | SREBF2        | -0.5        | <b>-1.4</b> | -0.4        | -0.6        |
| <b>sterol-C4-methyl oxidase-like</b>                        | <b>SC4MOL</b> | <b>-1.5</b> | <b>-2.0</b> | <b>-1.1</b> | <b>-1.8</b> |
| synaptotagmin binding, cytoplasmic RNA interacting protein  | SYNCRIP       | -0.3        | -0.3        | -0.6        | <b>-1.0</b> |
| syndecan 1                                                  | SDC1          | -0.5        | -0.8        | -0.7        | <b>-1.6</b> |
| TATA box binding protein (TBP)-associated factor, 105kDa    | TAF4B         | -0.6        | -0.8        | -0.7        | <b>-1.2</b> |
| THO complex 3                                               | THOC3         | -0.2        | -0.2        | -0.3        | -0.7        |
| three prime repair exonuclease 2                            | TREX2         | -0.3        | -0.5        | -0.4        | -0.5        |
| thymine-DNA glycosylase                                     | TDG           | -0.3        | -0.6        | -0.5        | -0.8        |
| TNF receptor-associated factor 7                            | TRAF7         | -0.3        | -0.7        | -0.7        | -0.9        |
| TP53 regulating kinase                                      | TP53RK        | -0.3        | -0.3        | -0.3        | -0.9        |
| E2A immunoglobulin enhancer binding factors E12/E47         | TCF3          | -0.8        | -0.6        | -0.8        | -0.8        |
| E2A immunoglobulin enhancer binding factors E12/E47         | TCF3          | -0.8        | -0.5        | -0.3        | -0.4        |
| transcription factor Dp-1                                   | TFDP1         | -0.3        | -0.7        | -0.3        | -0.5        |
| transcription factor Dp-1                                   | TFDP1         | -0.6        | -0.5        | -0.7        | -0.8        |
| transforming, acidic coiled-coil containing protein 3       | TACC3         | -0.8        | -0.7        | -0.3        | <b>-1.2</b> |
| translocation associated membrane protein 2                 | TRAM2         | -0.9        | <b>-1.2</b> | -0.3        | -0.4        |
| transporter 2, ATP-binding cassette, sub-family B (MDR/TAP) | TAP2          | -0.6        | -0.6        | -0.6        | -0.4        |
| tripartite motif-containing 14                              | TRIM14        | <b>-1.4</b> | -0.8        | -0.5        | <b>-1.0</b> |
| tripeptidyl peptidase II                                    | TPP2          | -0.4        | -0.6        | -0.5        | -0.7        |
| tripeptidyl peptidase II                                    | TPP2          | -0.4        | -0.4        | -0.3        | -0.6        |

|                                                                    |          |             |             |             |             |
|--------------------------------------------------------------------|----------|-------------|-------------|-------------|-------------|
| tubulin, gamma 1                                                   | TUBG1    | <b>-1.0</b> | -0.9        | -0.6        | <b>-1.2</b> |
| tumor necrosis factor receptor superfamily, member 17              | TNFRSF17 | -0.7        | -0.9        | -0.4        | -0.7        |
| ubiquinol-cytochrome c reductase, Rieske iron-sulfur polypeptide 1 | UQCRFS1  | -0.3        | -0.4        | -0.5        | -0.5        |
| ubiquitin-conjugating enzyme E2, J1 (UBC6 homolog, yeast)          | UBE2J1   | -0.8        | <b>-1.4</b> | -0.6        | -0.7        |
| ubiquitin-conjugating enzyme E2, J1 (UBC6 homolog, yeast)          | UBE2J1   | -0.5        | <b>-1.1</b> | -0.6        | -0.6        |
| ubiquitin-conjugating enzyme E2, J1 (UBC6 homolog, yeast)          | UBE2J1   | -0.7        | <b>-1.0</b> | <b>-1.0</b> | -0.6        |
| ubiquitin-conjugating enzyme E2, J1 (UBC6 homolog, yeast)          | UBE2J1   | -0.6        | -0.8        | -0.7        | -0.5        |
| ubiquitin-conjugating enzyme E2, J1 (UBC6 homolog, yeast)          | UBE2J1   | -0.5        | -0.8        | -0.8        | -0.5        |
| ubiquitin-conjugating enzyme E2E 1 (UBC4/5 homolog, yeast)         | UBE2E1   | -0.3        | -0.5        | -0.2        | -0.4        |
| ubiquitin-conjugating enzyme E2S                                   | UBE2S    | <b>-1.0</b> | <b>-1.1</b> | -0.6        | -0.9        |
| UDP-glucose ceramide glucosyltransferase                           | UGCG     | -0.3        | -0.5        | -0.5        | -0.8        |
| UDP-N-acetylglucosamine pyrophosphorylase 1                        | UAP1     | -0.6        | <b>-1.3</b> | -0.5        | <b>-1.3</b> |
| unc-13 homolog C (C. elegans)                                      | UNC13C   | <b>-1.4</b> | -0.8        | -0.9        | <b>-1.4</b> |
| unc-13 homolog C (C. elegans)                                      | UNC13C   | <b>-1.2</b> | -0.7        | -0.9        | <b>-1.2</b> |
| unc-13 homolog C (C. elegans)                                      | UNC13C   | <b>-1.2</b> | -0.7        | -0.7        | <b>-1.4</b> |
| unc-84 homolog B (C. elegans)                                      | UNC84B   | -0.5        | -0.5        | -0.7        | -0.7        |
| unc-93 homolog B1 (C. elegans)                                     | UNC93B1  | -0.4        | -0.6        | -0.3        | -0.9        |
| v-ets erythroblastosis virus E26 oncogene homolog 1 (avian)        | ETS1     | -0.4        | -0.7        | -0.5        | -0.9        |
| vitamin K epoxide reductase complex, subunit 1                     | VKORC1   | -0.4        | -0.8        | -0.2        | -0.5        |
| v-myb myeloblastosis viral oncogene homolog (avian)                | MYB      | -0.5        | -0.8        | -0.7        | -0.9        |
| wingless-type MMTV integration site family, member 10A             | WNT10A   | -0.5        | -0.5        | -0.7        | <b>-1.7</b> |
| Wolf-Hirschhorn syndrome candidate 1                               | WHSC1    | -0.4        | -0.5        | -0.4        | <b>-1.1</b> |
| YY1 associated protein                                             | YAP      | -0.5        | -0.2        | -0.3        | -0.3        |
| zinc finger CCCH type domain containing 1                          | ZC3HDC1  | -0.7        | <b>-1.0</b> | -0.4        | -0.7        |
| zinc finger protein 22 (KOX 15)                                    | ZNF22    | -0.4        | -0.5        | -0.4        | -0.5        |

**LogRatios for down-regulated genes at 24 h in all cell lines**

**Two-fold changes are in green bold**

| Gene Descriptor                                            | Symbol | U266<br>24h | MM.1s<br>24h | 8226/S<br>24h | KMS11<br>24h |
|------------------------------------------------------------|--------|-------------|--------------|---------------|--------------|
| 24-dehydrocholesterol reductase                            | DHCR24 | <b>-2.6</b> | <b>-2.0</b>  | -0.4          | <b>-1.7</b>  |
| 3-hydroxy-3-methylglutaryl-Coenzyme A reductase            | HMGCR  | <b>-1.7</b> | <b>-1.5</b>  | -0.6          | <b>-1.5</b>  |
| 3-hydroxy-3-methylglutaryl-Coenzyme A reductase            | HMGCR  | <b>-1.5</b> | <b>-1.3</b>  | -0.5          | <b>-1.3</b>  |
| 3-hydroxy-3-methylglutaryl-Coenzyme A synthase 1 (soluble) | HMGCS1 | <b>-1.8</b> | <b>-2.0</b>  | -0.3          | <b>-1.9</b>  |
| 3-oxoacid CoA transferase 1                                | OXCT1  | -0.6        | -0.4         | -0.1          | -0.4         |
| 7-dehydrocholesterol reductase                             | DHCR7  | <b>-1.9</b> | <b>-2.9</b>  | -0.6          | <b>-2.0</b>  |
| 7-dehydrocholesterol reductase                             | DHCR7  | <b>-1.6</b> | <b>-2.5</b>  | -0.6          | <b>-1.6</b>  |

|                                                                                    |                                    |             |             |             |             |
|------------------------------------------------------------------------------------|------------------------------------|-------------|-------------|-------------|-------------|
| 8D6 antigen                                                                        | 8D6A                               | <b>-1.5</b> | <b>-1.3</b> | -0.7        | <b>-1.8</b> |
| a disintegrin and metalloproteinase domain 10                                      | ADAM10                             | -0.4        | <b>-1.2</b> | -0.5        | -0.9        |
| activated RNA polymerase II transcription cofactor 4                               | PC4                                | -0.8        | <b>-1.2</b> | -0.6        | -0.8        |
| acyl-CoA synthetase long-chain family member 3                                     | ACSL3                              | -0.5        | -0.9        | -0.2        | -0.3        |
| adaptor protein with pleckstrin homology and src homology 2 domains                | APS                                | <b>-1.4</b> | -0.9        | -0.4        | -0.8        |
| adenosine monophosphate deaminase 1 (isoform M)                                    | AMPD1                              | <b>-1.1</b> | <b>-2.7</b> | -0.7        | <b>-1.5</b> |
| Aminoacylase 1-like 2                                                              | ACY1L2                             | -0.6        | <b>-1.2</b> | -0.4        | <b>-1.2</b> |
| Aminoacylase 1-like 2                                                              | ACY1L2                             | -0.5        | -0.8        | -0.3        | <b>-1.0</b> |
| arginine-rich, mutated in early stage tumors                                       | ARMET                              | <b>-1.1</b> | <b>-1.6</b> | -0.2        | <b>-1.5</b> |
| ATP citrate lyase                                                                  | ACLY                               | -0.4        | -0.6        | -0.2        | -0.6        |
| ATP citrate lyase                                                                  | ACLY                               | -0.4        | -0.4        | -0.2        | -0.3        |
| ATP synthase, H <sup>+</sup> transporting, mitochondrial F1 complex, delta subunit | ATP5D                              | -0.4        | -0.6        | -0.5        | -0.9        |
| ATPase type 13A                                                                    | ATP13A                             | -0.6        | -0.6        | -0.3        | <b>-1.1</b> |
| ATPase, Ca <sup>++</sup> transporting, cardiac muscle, slow twitch 2               | ATP2A2                             | -0.7        | -0.9        | -0.4        | -0.5        |
| ATPase, Class I, type 8B, member 2                                                 | ATP8B2                             | -0.5        | <b>-1.0</b> | -0.2        | <b>-1.0</b> |
| BCL2-like 1                                                                        | BCL2L1                             | <b>-1.5</b> | <b>-1.0</b> | -0.7        | <b>-1.7</b> |
| BCL2-like 1                                                                        | BCL2L1                             | <b>-1.3</b> | <b>-1.0</b> | -0.5        | <b>-1.3</b> |
| BCL2-like 1 /// BCL2-like 1                                                        | BCL2L1                             | <b>-1.1</b> | <b>-1.1</b> | -0.6        | <b>-1.3</b> |
| bicaudal D homolog 2 (Drosophila)                                                  | BICD2                              | -0.7        | -0.3        | -0.5        | -0.7        |
| bicaudal D homolog 2 (Drosophila)                                                  | BICD2                              | -0.6        | -0.3        | -0.4        | -0.6        |
| BTB (POZ) domain containing 3                                                      | BTBD3                              | <b>-1.1</b> | <b>-1.1</b> | -0.9        | <b>-1.1</b> |
| butyrophilin, subfamily 3, member A1                                               | BTN3A1                             | -0.7        | -0.8        | -0.3        | -0.4        |
| Butyrophilin, subfamily 3, member A2                                               | BTN3A2                             | <b>-2.3</b> | <b>-1.6</b> | -0.8        | <b>-4.0</b> |
| butyrophilin, subfamily 3, member A2                                               | BTN3A2                             | <b>-1.7</b> | <b>-1.4</b> | -0.7        | <b>-1.7</b> |
| butyrophilin, subfamily 3, member A3                                               | BTN3A3                             | <b>-1.7</b> | <b>-1.4</b> | -0.7        | <b>-1.5</b> |
| calmodulin-like 4                                                                  | CALML4                             | <b>-1.2</b> | <b>-1.8</b> | -0.4        | -0.5        |
| calreticulin                                                                       | CALR                               | -0.7        | <b>-1.1</b> | -0.6        | <b>-1.5</b> |
| calreticulin                                                                       | CALR                               | -0.3        | -0.5        | -0.3        | -0.8        |
| Casein kinase 1, epsilon                                                           | CSNK1E                             | -0.8        | -0.8        | -0.6        | -0.5        |
| casein kinase 1, epsilon                                                           | CSNK1E                             | -0.4        | -0.7        | -0.4        | -0.6        |
| caveolin 1, caveolae protein, 22kDa                                                | CAV1                               | -0.5        | <b>-1.0</b> | -0.8        | <b>-1.5</b> |
| caveolin 1, caveolae protein, 22kDa                                                | CAV1                               | -0.4        | -0.8        | -0.9        | <b>-1.3</b> |
| Cbp/p300-interacting transactivator, with Glu/Asp-rich carboxy-terminal domain, 2  | CITED2                             | -0.6        | <b>-1.0</b> | <b>-1.1</b> | -0.4        |
| Cbp/p300-interacting transactivator, with Glu/Asp-rich carboxy-terminal domain, 2  | CITED2                             | -0.7        | -0.9        | <b>-1.1</b> | -0.5        |
| ceroid-lipofuscinosis, neuronal 6, late infantile, variant                         | CLN6                               | -0.7        | <b>-1.0</b> | -0.3        | <b>-1.3</b> |
| CGI-100 protein                                                                    | CGI-100                            | -0.8        | <b>-1.0</b> | -0.3        | -0.9        |
| chemokine (C-C motif) ligand 3                                                     | CCL3 ///<br>CCL3L1 ///<br>MGC12815 | -0.2        | <b>-2.0</b> | <b>-2.1</b> | <b>-1.1</b> |
| chemokine (C-C motif) receptor 1                                                   | CCR1                               | -0.7        | -0.7        | -0.6        | <b>-1.6</b> |
| chemokine (C-C motif) receptor 1                                                   | CCR1                               | -0.7        | -0.7        | -0.5        | <b>-1.2</b> |
| chromosome 1 open reading frame 22                                                 | C1orf22                            | -0.3        | <b>-1.0</b> | -0.2        | -0.7        |
| Chromosome 10 open reading frame 75                                                | C10orf75                           | <b>-1.0</b> | <b>-1.5</b> | -0.9        | -0.9        |
| chromosome 14 open reading frame 147                                               | C14orf147                          | -0.5        | -0.3        | -0.2        | -0.3        |
| chromosome 15 open reading frame 22                                                | C15orf22                           | -0.6        | -0.5        | -0.3        | -0.9        |

|                                                                                       |                   |             |             |             |             |
|---------------------------------------------------------------------------------------|-------------------|-------------|-------------|-------------|-------------|
| chromosome 19 open reading frame 10                                                   | C19orf10          | -0.8        | <b>-1.0</b> | -0.5        | <b>-1.0</b> |
| chromosome 19 open reading frame 10                                                   | C19orf10          | -0.4        | -0.7        | -0.4        | -0.8        |
| chromosome 2 open reading frame 30                                                    | C2orf30           | -0.4        | -0.7        | -0.3        | -0.3        |
| chromosome 3 open reading frame 6                                                     | C3orf6            | -0.9        | -0.6        | -0.3        | -0.8        |
| chromosome 5 open reading frame 13                                                    | C5orf13           | -0.9        | -0.7        | -0.7        | -0.4        |
| cisplatin resistance related protein CRR9p                                            | CRR9              | <b>-1.0</b> | -0.9        | -0.3        | <b>-1.0</b> |
| Hs.80305 /len=1196                                                                    |                   | -0.4        | -0.5        | -0.7        | -0.5        |
| coenzyme Q4 homolog (yeast)                                                           | COQ4              | -0.4        | -0.4        | -0.5        | -0.6        |
| CLONE=IMAGE:2273535 /UG=Hs.123370 ESTs                                                |                   | -0.9        | <b>-1.0</b> | -0.8        | -0.8        |
| CLONE=IMAGE:2383109 /UG=Hs.20300 ESTs                                                 |                   | <b>-1.4</b> | <b>-1.0</b> | -0.5        | <b>-1.0</b> |
| CLONE=CS0DI031YP04 (3 prime)<br>/UG=Hs.173705                                         |                   | -0.6        | -0.6        | -0.5        | <b>-1.1</b> |
| CLONE=BMFBGA04 /UG=Hs.13323                                                           |                   | -0.7        | -0.8        | -0.2        | -0.8        |
| CLONE=IMAGE:3272383 /UG=Hs.40328 ESTs                                                 |                   | -0.4        | -0.4        | -0.5        | -0.4        |
| <b>CLONE=IMAGE:3071091 /UG=Hs.22627 ESTs</b>                                          |                   | <b>-1.7</b> | <b>-1.1</b> | <b>-1.2</b> | <b>-2.4</b> |
| CLONE=IMAGE:261468 /UG=Hs.251865 ESTs                                                 |                   | -0.7        | <b>-1.5</b> | -0.4        | -0.6        |
| CLONE=IMAGE:111468 /UG=Hs.308800 ESTs                                                 |                   | <b>-1.3</b> | <b>-1.0</b> | -0.5        | -0.7        |
| Core 1 UDP-galactose:N-acetylgalactosamine-<br>alpha-R beta 1,3-galactosyltransferase | C1GALT1           | -0.7        | -0.5        | -0.8        | -0.7        |
| cryptochrome 1 (photolyase-like)                                                      | CRY1              | -0.8        | <b>-1.9</b> | -0.7        | <b>-1.0</b> |
| CSRP2 binding protein                                                                 | CSRP2BP           | -0.5        | -0.7        | -0.3        | -0.7        |
| C-type lectin, superfamily member 12                                                  | CLECSF12          | -0.3        | <b>-1.9</b> | -0.4        | <b>-1.3</b> |
| C-type lectin, superfamily member 12                                                  | CLECSF12          | -0.4        | <b>-1.6</b> | -0.3        | <b>-1.3</b> |
| C-type lectin, superfamily member 12                                                  | CLECSF12          | -0.3        | <b>-2.4</b> | -0.4        | <b>-1.6</b> |
| cutC copper transporter homolog (E.coli)                                              | CUTC              | -0.5        | -0.3        | -0.5        | -0.3        |
| cyclin D2                                                                             | CCND2             | -0.9        | -0.4        | -0.5        | <b>-1.0</b> |
| cyclin D2                                                                             | CCND2             | -0.9        | -0.3        | -0.4        | -0.6        |
| cytochrome P450, family 51, subfamily A,<br>polypeptide 1                             | CYP51A1           | <b>-1.3</b> | <b>-1.9</b> | -0.3        | <b>-1.5</b> |
| cytochrome P450, family 51, subfamily A,<br>polypeptide 1                             | CYP51A1           | <b>-1.4</b> | <b>-1.8</b> | -0.5        | <b>-1.4</b> |
| cytoplasmic polyadenylation element binding<br>protein 4                              | CPEB4             | -0.6        | -0.4        | -0.5        | -0.6        |
| cytoskeleton-associated protein 4                                                     | CKAP4             | <b>-1.0</b> | <b>-1.3</b> | -0.4        | <b>-1.2</b> |
| cytoskeleton-associated protein 4                                                     | CKAP4             | -0.9        | <b>-1.3</b> | -0.4        | <b>-1.1</b> |
| deleted in lymphocytic leukemia, 1                                                    | DLEU1             | -0.7        | -0.9        | -0.6        | <b>-1.2</b> |
| <b>Der1-like domain family, member 3</b>                                              | DERL3             | <b>-1.6</b> | <b>-1.0</b> | <b>-1.0</b> | <b>-2.6</b> |
| dicarbonyl/L-xylulose reductase                                                       | DCXR              | -0.8        | -0.4        | -0.2        | <b>-1.1</b> |
| DKFZP564I1171 protein                                                                 | DKFZP564I<br>1171 | -0.5        | <b>-1.3</b> | -0.5        | -0.3        |
| dolichyl-phosphate mannosyltransferase<br>polypeptide 3                               | DPM3              | <b>-1.0</b> | <b>-1.2</b> | -0.6        | -0.9        |
| dual specificity phosphatase 22                                                       | DUSP22            | -0.5        | <b>-1.0</b> | -0.3        | -0.6        |
| dUTP pyrophosphatase                                                                  | DUT               | -0.7        | -0.3        | -0.3        | -0.9        |
| E2F transcription factor 5, p130-binding                                              | E2F5              | -0.4        | <b>-1.0</b> | -0.3        | -0.9        |
| elongation factor, RNA polymerase II, 2                                               | ELL2              | -0.7        | -0.4        | -0.7        | -0.9        |
| emopamil binding protein (sterol isomerase)                                           | EBP               | <b>-1.0</b> | <b>-1.6</b> | -0.2        | <b>-1.1</b> |
| endoplasmic reticulum to nucleus signalling 1                                         | ERN1              | -0.8        | <b>-1.7</b> | <b>-1.1</b> | -0.6        |
| eukaryotic translation initiation factor 1A, X-linked                                 | EIF1AX            | -0.8        | -0.5        | -0.2        | -0.7        |
| family with sequence similarity 46, member C                                          | FAM46C            | <b>-1.5</b> | <b>-1.9</b> | -0.4        | <b>-1.4</b> |
| family with sequence similarity 46, member C                                          | FAM46C            | <b>-1.4</b> | <b>-1.6</b> | -0.5        | <b>-1.2</b> |
| farnesyl-diphosphate farnesyltransferase 1                                            | FDFT1             | <b>-1.7</b> | <b>-2.0</b> | -0.5        | <b>-1.4</b> |
| farnesyl-diphosphate farnesyltransferase 1                                            | FDFT1             | <b>-1.7</b> | <b>-1.9</b> | -0.4        | <b>-1.6</b> |

|                                                                       |               |      |      |      |      |
|-----------------------------------------------------------------------|---------------|------|------|------|------|
| fatty acid desaturase 1                                               | FADS1         | -1.9 | -3.6 | -0.4 | -1.5 |
| fatty acid desaturase 1                                               | FADS1         | -2.0 | -3.0 | -0.5 | -2.1 |
| fatty acid desaturase 1                                               | FADS1         | -1.5 | -1.7 | -0.5 | -1.1 |
| fatty acid synthase                                                   | FASN          | -2.3 | -1.6 | -0.9 | -2.3 |
| FK506 binding protein 11, 19 kDa                                      | FKBP11        | -1.6 | -1.7 | -0.4 | -2.3 |
| FK506 binding protein 11, 19 kDa                                      | FKBP11        | -1.6 | -1.6 | -0.5 | -2.4 |
| for protein disulfide isomerase-related                               | PDIR          | -1.1 | -1.0 | -0.4 | -1.7 |
| Friend leukemia virus integration 1                                   | FLI1          | -0.5 | -0.6 | -0.5 | -0.4 |
| FtsJ homolog 1 (E. coli)                                              | FTSJ1         | -0.7 | -0.4 | -0.5 | -0.9 |
| G protein-coupled receptor 160                                        | GPR160        | -1.7 | -0.7 | -0.4 | -0.3 |
| Hs.119597 stearoyl-CoA desaturase                                     |               | -1.3 | -2.8 | -0.4 | -1.4 |
| general transcription factor IIIA                                     | GTF3A         | -0.6 | -0.5 | -0.5 | -0.6 |
| general transcription factor IIIA                                     | GTF3A         | -0.6 | -0.5 | -0.4 | -0.6 |
| glucocorticoid induced transcript 1                                   | GLCCI1        | -1.7 | -1.3 | -0.6 | -1.3 |
| glucocorticoid induced transcript 1                                   | GLCCI1        | -1.8 | -1.3 | -0.4 | -1.3 |
| Glucocorticoid induced transcript 1                                   | GLCCI1        | -2.3 | -1.2 | -0.3 | -1.6 |
| glutaminase                                                           | GLS           | -0.4 | -0.7 | -0.2 | -0.7 |
| glycosyltransferase AD-017                                            | AD-017        | -1.1 | -1.4 | -0.6 | -0.9 |
| golgi associated, gamma adaptin ear containing, ARF binding protein 2 | GGA2          | -0.4 | -0.6 | -0.4 | -0.4 |
| H1 histone family, member X                                           | H1FX          | -0.5 | -1.7 | -0.6 | -0.5 |
| H3 histone, family 3B (H3.3B)                                         | H3F3B         | -1.9 | -3.0 | -0.9 | -0.4 |
| heat shock 70kDa protein 5 (glucose-regulated protein, 78kDa)         | HSPA5         | -0.8 | -0.8 | -0.4 | -1.1 |
| hepatitis delta antigen-interacting protein A                         | DIPA          | -0.5 | -0.6 | -0.5 | -0.9 |
| heterogeneous nuclear ribonucleoprotein C (C1/C2)                     | HNRPC         | -0.9 | -0.8 | -0.6 | -0.9 |
| heterogeneous nuclear ribonucleoprotein D-like                        | HNRPDL        | -0.4 | -0.8 | -0.5 | -0.6 |
| High density lipoprotein binding protein (vigilin)                    | HDLBP         | -0.7 | -0.5 | -0.5 | -0.6 |
| high mobility group AT-hook 1                                         | HMGA1         | -0.5 | -0.7 | -0.5 | -1.1 |
| high-mobility group box 1                                             | HMGB1         | -0.9 | -1.5 | -0.5 | -0.6 |
| histone deacetylase 9                                                 | HDAC9         | -0.8 | -0.9 | -1.6 | -1.0 |
| HLA-G histocompatibility antigen, class I, G                          | HLA-G         | -0.7 | -0.3 | -0.3 | -0.5 |
| HMT1 hnRNP methyltransferase-like 2 (S. cerevisiae)                   | HRMT1L2       | -0.5 | -0.8 | -0.4 | -0.7 |
| hydroxysteroid (17-beta) dehydrogenase 8                              | HSD17B8       | -0.6 | -1.0 | -0.5 | -1.1 |
| Hypothetical LOC402578                                                |               | -1.3 | -0.6 | -0.6 | -0.8 |
| hypothetical protein DKFZp762C1112                                    | DKFZp762C1112 | -0.4 | -0.5 | -0.3 | -0.9 |
| hypothetical protein FLJ10154                                         | FLJ10154      | -0.6 | -0.6 | -0.3 | -0.4 |
| hypothetical protein FLJ10204                                         | FLJ10204      | -0.6 | -0.5 | -0.6 | -0.6 |
| Hypothetical protein FLJ20254                                         | FLJ20254      | -0.7 | -0.9 | -0.4 | -0.7 |
| Hypothetical protein FLJ35036                                         | FLJ35036      | -0.8 | -0.4 | -0.4 | -0.7 |
| hypothetical protein FLJ35036                                         | FLJ35036      | -0.3 | -0.3 | -0.5 | -0.6 |
| hypothetical protein HSPC268                                          | HSPC268       | -0.4 | -0.8 | -0.4 | -0.6 |
| hypothetical protein HSPC268                                          | HSPC268       | -0.4 | -0.7 | -0.4 | -0.7 |
| hypothetical protein LOC202781                                        | LOC202781     | -0.7 | -1.2 | -0.5 | -0.9 |
| hypothetical protein LOC339287                                        | LOC339287     | -0.8 | -1.0 | -0.6 | -0.7 |
| hypothetical protein LOC51061                                         | LOC51061      | -0.7 | -1.5 | -0.5 | -0.9 |
| hypothetical protein MGC4172                                          | MGC4172       | -0.5 | -1.1 | -0.6 | -1.8 |
| hypothetical protein MGC5508                                          | MGC5508       | -0.3 | -0.4 | -0.3 | -0.8 |
| hypoxia up-regulated 1                                                | HYOU1         | -0.7 | -1.3 | -0.3 | -1.0 |
| immunoglobulin superfamily, member 4                                  | IGSF4         | -0.8 | -1.8 | -0.3 | -1.0 |

|                                                                  |                    |             |             |             |             |
|------------------------------------------------------------------|--------------------|-------------|-------------|-------------|-------------|
| Immunoglobulin superfamily, member 4                             | IGSF4              | -0.5        | <b>-1.5</b> | -0.3        | <b>-1.0</b> |
| <b>insulin induced gene 1</b>                                    | INSIG1             | <b>-3.0</b> | <b>-3.1</b> | <b>-1.1</b> | <b>-1.6</b> |
| <b>insulin induced gene 1</b>                                    | INSIG1             | <b>-2.9</b> | <b>-3.0</b> | <b>-1.3</b> | <b>-1.7</b> |
| <b>insulin induced gene 1</b>                                    | INSIG1             | <b>-3.0</b> | <b>-2.9</b> | <b>-1.0</b> | <b>-1.9</b> |
| interferon regulatory factor 4                                   | IRF4               | <b>-1.5</b> | <b>-1.6</b> | -0.7        | <b>-1.6</b> |
| interferon regulatory factor 4                                   | IRF4               | <b>-1.4</b> | <b>-1.5</b> | -0.8        | <b>-1.1</b> |
| interferon stimulated gene 20kDa                                 | ISG20              | <b>-1.4</b> | -0.8        | -0.7        | -0.4        |
| interleukin enhancer binding factor 3, 90kDa                     | ILF3               | -0.3        | -0.3        | -0.3        | -0.7        |
| interleukin-1 receptor-associated kinase 1                       | IRAK1              | -0.3        | -0.4        | -0.3        | <b>-1.2</b> |
| Intermediate filament protein syncoilin                          | SYNCOIL1<br>N      | <b>-1.2</b> | -0.9        | -0.5        | -0.8        |
| ischemia/reperfusion inducible protein                           | FLJ23476           | -0.6        | -0.6        | -0.6        | <b>-1.1</b> |
| isopentenyl-diphosphate delta isomerase                          | IDI1               | <b>-1.8</b> | <b>-1.9</b> | -0.3        | <b>-1.3</b> |
| isopentenyl-diphosphate delta isomerase                          | IDI1               | <b>-1.7</b> | <b>-1.9</b> | -0.4        | <b>-1.3</b> |
| KDEL endoplasmic reticulum protein retention receptor 2          | KDELR2             | -0.4        | -0.7        | -0.3        | -0.7        |
| KH-type splicing regulatory protein (FUSE binding protein 2)     | KHSRP              | -0.5        | -0.5        | -0.4        | -0.6        |
| lanosterol synthase (2,3-oxidosqualene-lanosterol cyclase)       | LSS                | <b>-1.4</b> | <b>-2.4</b> | -0.7        | <b>-1.4</b> |
| lanosterol synthase (2,3-oxidosqualene-lanosterol cyclase)       | LSS                | <b>-1.2</b> | <b>-2.0</b> | -0.6        | <b>-1.4</b> |
| low density lipoprotein receptor (familial hypercholesterolemia) | LDLR               | <b>-2.6</b> | <b>-3.6</b> | -0.6        | <b>-1.7</b> |
| low density lipoprotein receptor (familial hypercholesterolemia) | LDLR               | <b>-1.8</b> | <b>-3.2</b> | -0.6        | <b>-1.8</b> |
| low density lipoprotein receptor (familial hypercholesterolemia) | LDLR               | <b>-2.3</b> | <b>-3.0</b> | -0.6        | <b>-1.4</b> |
| LYRIC/3D3                                                        | LYRIC              | -0.8        | -0.5        | -0.5        | -0.7        |
| major histocompatibility complex, class I, B                     | HLA-B              | <b>-1.0</b> | -0.5        | -0.5        | -0.5        |
| major histocompatibility complex, class I, C                     | HLA-C ///<br>HLA-B | -0.9        | -0.3        | -0.4        | -0.4        |
| major histocompatibility complex, class I, E                     | HLA-E              | <b>-1.4</b> | <b>-2.3</b> | -0.5        | <b>-1.3</b> |
| major histocompatibility complex, class I, E                     | HLA-E              | -0.8        | <b>-1.5</b> | -0.3        | -0.7        |
| major histocompatibility complex, class I, F                     | HLA-F              | <b>-1.1</b> | -0.4        | -0.4        | -0.7        |
| major histocompatibility complex, class I, F                     | HLA-F              | -0.9        | -0.4        | -0.4        | -0.6        |
| MCM7 minichromosome maintenance deficient 7 (S. cerevisiae)      | MCM7               | <b>-1.3</b> | <b>-1.7</b> | -0.5        | <b>-1.3</b> |
| MCM7 minichromosome maintenance deficient 7 (S. cerevisiae)      | MCM7               | <b>-1.1</b> | <b>-1.5</b> | -0.6        | <b>-1.2</b> |
| mitochondrial ribosomal protein L23                              | MRPL23             | -0.8        | -0.5        | -0.3        | -0.9        |
| M-phase phosphoprotein 9                                         | MPHOSPH<br>9       | <b>-1.1</b> | -0.4        | -0.3        | -0.3        |
| MRNA; cDNA DKFZp564C0762 (from clone DKFZp564C0762)              |                    | <b>-1.1</b> | -0.8        | -0.4        | <b>-1.0</b> |
| myosin regulatory light chain interacting protein                | MYLIP              | -0.9        | -0.9        | <b>-1.6</b> | -0.9        |
| NADH dehydrogenase (ubiquinone) flavoprotein 2, 24kDa            | NDUFV2             | -0.2        | -0.6        | -0.2        | -0.5        |
| nuclear autoantigenic sperm protein (histone-binding)            | NASP               | -0.6        | -0.9        | -0.5        | -0.6        |
| nuclear factor (erythroid-derived 2)-like 3                      | NFE2L3             | -0.5        | <b>-1.0</b> | -0.5        | -0.8        |
| nuclear factor, interleukin 3 regulated                          | NFIL3              | -0.6        | <b>-1.7</b> | -0.6        | <b>-1.0</b> |
| nucleostemin                                                     | NS                 | -0.8        | -0.3        | -0.3        | -0.8        |
| PAI-1 mRNA-binding protein                                       | PAI-RBP1           | -0.3        | -0.6        | -0.6        | -0.9        |

|                                                                    |             |             |             |             |             |
|--------------------------------------------------------------------|-------------|-------------|-------------|-------------|-------------|
| PALM2-AKAP2 protein                                                | PALM2-AKAP2 | <b>-1.3</b> | -0.9        | -0.4        | -0.9        |
| PALM2-AKAP2 protein                                                | PALM2-AKAP2 | <b>-1.2</b> | -0.7        | -0.2        | -0.9        |
| Paternally expressed 10                                            | PEG10       | -0.8        | <b>-1.1</b> | -0.6        | -0.6        |
| Paternally expressed 10                                            | PEG10       | -0.7        | <b>-1.0</b> | -0.7        | -0.6        |
| PAX transcription activation domain interacting protein 1 like     | PAXIP1L     | -0.6        | <b>-1.0</b> | -0.4        | -0.8        |
| peroxiredoxin 4                                                    | PRDX4       | <b>-1.0</b> | <b>-1.2</b> | -0.2        | <b>-1.0</b> |
| phosphatidylinositol glycan, class F                               | PIGF        | -0.7        | -0.6        | -0.3        | -0.7        |
| phosphatidylinositol glycan, class F                               | PIGF        | -0.4        | -0.5        | -0.4        | -0.4        |
| phosphoribosylaminoimidazole carboxylase                           | PAICS       | -0.5        | -0.6        | -0.3        | -0.9        |
| phosphoribosylaminoimidazole carboxylase                           | PAICS       | -0.6        | -0.6        | -0.2        | -0.8        |
| plakophilin 2                                                      | PKP2        | <b>-1.5</b> | <b>-1.5</b> | -0.4        | -0.7        |
| POU domain, class 2, associating factor 1                          | POU2AF1     | <b>-1.4</b> | -0.8        | <b>-1.1</b> | -0.9        |
| PR domain containing 1, with ZNF domain                            | PRDM1       | <b>-1.0</b> | <b>-1.1</b> | -0.9        | <b>-1.3</b> |
| proapoptotic caspase adaptor protein                               | PACAP       | <b>-1.9</b> | <b>-1.9</b> | -0.8        | <b>-3.3</b> |
| proapoptotic caspase adaptor protein                               | PACAP       | <b>-3.4</b> | <b>-1.8</b> | -0.6        | <b>-2.9</b> |
| protease, serine, 7 (enterokinase)                                 | PRSS7       | -0.7        | <b>-3.5</b> | -0.6        | <b>-3.3</b> |
| proteasome (prosome, macropain) subunit, beta type, 8              | PSMB8       | <b>-1.0</b> | -0.8        | -0.2        | <b>-1.1</b> |
| protein disulfide isomerase related protein                        | ERP70       | <b>-1.1</b> | <b>-1.8</b> | -0.6        | <b>-1.8</b> |
| protein disulfide isomerase related protein                        | ERP70       | <b>-1.3</b> | <b>-1.9</b> | -0.5        | <b>-1.8</b> |
| protein kinase D3                                                  | PRKD3       | -0.7        | -0.9        | -0.4        | -0.3        |
| protein kinase D3 /// protein kinase D3                            | PRKD3       | <b>-1.1</b> | <b>-1.0</b> | -0.4        | -0.4        |
| putative dimethyladenosine transferase                             | HSA9761     | -0.3        | -0.6        | -0.5        | -0.6        |
| putative nuclear protein ORF1-FL49                                 | ORF1-FL49   | -0.4        | <b>-1.3</b> | -0.4        | -0.6        |
| RAB36, member RAS oncogene family                                  | RAB36       | <b>-1.1</b> | <b>-2.0</b> | -0.5        | <b>-1.4</b> |
| ras-related C3 botulinum toxin substrate 2                         | RAC2        | -0.9        | -0.9        | -0.2        | -0.6        |
| ras-related C3 botulinum toxin substrate 2                         | RAC2        | -0.6        | -0.5        | -0.2        | -0.3        |
| Rho GDP dissociation inhibitor (GDI) alpha                         | ARHGDI      | <b>-1.0</b> | -0.7        | -0.6        | -0.7        |
| Rho GDP dissociation inhibitor (GDI) alpha                         | ARHGDI      | <b>-1.2</b> | -0.6        | -0.4        | -0.6        |
| ribosomal protein S6 kinase, 70kDa, polypeptide 1                  | RPS6KB1     | <b>-1.0</b> | -0.5        | -0.6        | -0.5        |
| S-adenosylhomocysteine hydrolase                                   | AHCY        | -0.1        | -0.6        | -0.2        | -0.6        |
| SAM domain and HD domain 1                                         | SAMHD1      | -0.7        | -0.6        | -0.4        | -0.5        |
| SAM domain and HD domain 1                                         | SAMHD1      | -0.8        | -0.3        | -0.6        | -0.5        |
| SEC24 related gene family, member D (S. cerevisiae)                | SEC24D      | -0.5        | -0.6        | -0.6        | <b>-1.4</b> |
| Sec61 alpha 1 subunit (S. cerevisiae)                              | SEC61A1     | -0.3        | -0.6        | -0.2        | -0.4        |
| SEH1-like (S. cerevisiae)                                          | SEH1L       | -0.3        | -0.4        | -0.3        | -0.9        |
| selenoprotein T                                                    | SELT        | -0.8        | <b>-1.3</b> | -0.8        | -0.8        |
| selenoprotein T                                                    | SELT        | -0.3        | <b>-1.0</b> | <b>-1.0</b> | -0.6        |
| sialyltransferase 1 (beta-galactoside alpha-2,6-sialyltransferase) | SIAT1       | -0.9        | -0.6        | -0.8        | <b>-1.8</b> |
| signal recognition particle 72kDa                                  | SRP72       | -0.3        | -0.4        | -0.3        | -0.3        |
| signal sequence receptor, alpha                                    | SSR1        | -0.4        | <b>-1.0</b> | -0.2        | <b>-1.2</b> |
| signal sequence receptor, alpha                                    | SSR1        | -0.3        | -0.8        | -0.2        | <b>-1.0</b> |
| signal sequence receptor, gamma                                    | SSR3        | -0.5        | -0.9        | -0.5        | -0.7        |
| signal sequence receptor, gamma                                    | SSR3        | -0.3        | -0.8        | -0.4        | -0.8        |
| Similar to 0610010D24Rik protein                                   |             | -0.4        | <b>-1.0</b> | -0.7        | -0.9        |
| similar to RIKEN cDNA 2700047N05                                   | LOC134492   | -0.4        | -0.7        | -0.4        | -0.6        |
| small optic lobes homolog (Drosophila)                             | SOLH        | -0.5        | -0.5        | -0.4        | -0.7        |
| solute carrier family 29 (nucleoside transporters),                | SLC29A1     | -0.6        | -0.6        | -0.3        | -0.9        |



|                                                               |          |             |             |             |             |
|---------------------------------------------------------------|----------|-------------|-------------|-------------|-------------|
| member 1                                                      |          |             |             |             |             |
| solute carrier family 29 (nucleoside transporters), member 1  | SLC29A1  | -0.6        | -0.6        | -0.5        | -0.7        |
| solute carrier family 39 (zinc transporter), member 4         | SLC39A4  | -0.9        | -0.6        | -0.3        | -0.7        |
| squalene epoxidase                                            | SQLE     | <b>-1.8</b> | <b>-1.5</b> | -0.7        | <b>-1.8</b> |
| squalene epoxidase                                            | SQLE     | <b>-1.5</b> | <b>-1.3</b> | -0.6        | <b>-1.6</b> |
| START domain containing 4, sterol regulated                   | STARD4   | <b>-1.5</b> | <b>-1.8</b> | -0.6        | <b>-1.6</b> |
| stearoyl-CoA desaturase (delta-9-desaturase)                  | SCD      | <b>-1.9</b> | <b>-3.1</b> | -0.8        | <b>-2.2</b> |
| stearoyl-CoA desaturase (delta-9-desaturase)                  | SCD      | <b>-1.6</b> | <b>-3.0</b> | -0.8        | <b>-2.6</b> |
| stearoyl-CoA desaturase (delta-9-desaturase)                  | SCD      | <b>-1.6</b> | <b>-2.8</b> | -0.8        | <b>-2.0</b> |
| stearoyl-CoA desaturase (delta-9-desaturase)                  | SCD      | <b>-1.8</b> | <b>-3.1</b> | -0.7        | <b>-2.5</b> |
| sterol regulatory element binding transcription factor 2      | SREBF2   | <b>-1.6</b> | <b>-2.2</b> | -0.4        | <b>-1.5</b> |
| sterol regulatory element binding transcription factor 2      | SREBF2   | <b>-1.5</b> | <b>-2.0</b> | -0.3        | <b>-1.7</b> |
| sterol-C4-methyl oxidase-like                                 | SC4MOL   | <b>-2.1</b> | <b>-2.2</b> | -0.5        | <b>-1.8</b> |
| stromal cell-derived factor 2-like 1                          | SDF2L1   | <b>-1.5</b> | <b>-1.2</b> | -0.8        | <b>-1.8</b> |
| Synaptotagmin binding, cytoplasmic RNA interacting protein    | SYNCRIP  | -0.9        | -0.6        | -0.6        | -0.9        |
| synaptotagmin binding, cytoplasmic RNA interacting protein    | SYNCRIP  | -0.3        | -0.3        | -0.2        | -0.5        |
| syndecan 1                                                    | SDC1     | <b>-1.0</b> | <b>-1.0</b> | -0.5        | <b>-2.4</b> |
| syndecan 1                                                    | SDC1     | -0.5        | -0.6        | -0.3        | <b>-2.1</b> |
| thioredoxin domain containing 5                               | TXNDC5   | -0.5        | -0.6        | -0.4        | -0.8        |
| thioredoxin domain containing 7 (protein disulfide isomerase) | TXNDC7   | <b>-1.0</b> | <b>-1.4</b> | -0.5        | <b>-1.4</b> |
| thioredoxin domain containing 7 (protein disulfide isomerase) | TXNDC7   | -0.9        | <b>-1.4</b> | -0.3        | <b>-1.4</b> |
| thioredoxin domain containing 7 (protein disulfide isomerase) | TXNDC7   | -0.8        | <b>-1.2</b> | -0.3        | <b>-1.1</b> |
| thioredoxin domain containing 7 (protein disulfide isomerase) | TXNDC7   | -0.7        | <b>-1.2</b> | -0.3        | <b>-1.1</b> |
| thymine-DNA glycosylase                                       | TDG      | -0.5        | -0.6        | -0.4        | -0.5        |
| tissue inhibitor of metalloproteinase 2                       | TIMP2    | -0.9        | -0.6        | -0.4        | -0.4        |
| tissue inhibitor of metalloproteinase 2                       | TIMP2    | -0.9        | -0.4        | -0.3        | -0.3        |
| hypothetical protein LOC283585                                |          | -0.5        | <b>-1.3</b> | -0.5        | <b>-1.3</b> |
| transcription factor Dp-1                                     | TFDP1    | <b>-1.3</b> | <b>-1.9</b> | -0.5        | <b>-1.1</b> |
| translocation associated membrane protein 2                   | TRAM2    | <b>-1.4</b> | <b>-1.2</b> | -0.5        | -0.8        |
| translocation associated membrane protein 2                   | TRAM2    | <b>-1.1</b> | <b>-1.1</b> | -0.5        | -0.7        |
| tribbles homolog 1 (Drosophila)                               | TRIB1    | <b>-1.3</b> | <b>-2.0</b> | <b>-1.0</b> | -0.5        |
| tubulin, gamma 1                                              | TUBG1    | -0.9        | <b>-1.0</b> | -0.3        | -0.4        |
| tumor necrosis factor receptor superfamily, member 17         | TNFRSF17 | -0.9        | <b>-1.8</b> | <b>-1.5</b> | <b>-2.5</b> |
| tumor necrosis factor, alpha-induced protein 8                | TNFAIP8  | -0.4        | <b>-1.1</b> | -0.3        | -0.4        |
| tumor protein D52                                             | TPD52    | -0.5        | -0.9        | -0.3        | -0.5        |
| tumor protein D52                                             | TPD52    | -0.5        | -0.8        | -0.4        | -0.6        |
| tumor protein D52                                             | TPD52    | -0.5        | -0.7        | -0.2        | -0.7        |
| tumor rejection antigen (gp96) 1                              | TRA1     | <b>-1.4</b> | -0.9        | -0.4        | <b>-1.1</b> |
| tumor rejection antigen (gp96) 1                              | TRA1     | -0.7        | -0.3        | -0.3        | -0.5        |
| tumor suppressor deleted in oral cancer-related 1             | DOC-1R   | -0.7        | -0.8        | -0.3        | -0.9        |
| tyrosylprotein sulfotransferase 2                             | TPST2    | <b>-1.2</b> | -0.3        | -0.3        | -0.9        |
| <b>ubiquitin-conjugating enzyme E2, J1</b>                    | UBE2J1   | <b>-1.8</b> | <b>-1.2</b> | <b>-1.0</b> | <b>-1.5</b> |

|                                                           |        |             |             |      |             |
|-----------------------------------------------------------|--------|-------------|-------------|------|-------------|
| ubiquitin-conjugating enzyme E2, J1 (UBC6 homolog, yeast) | UBE2J1 | <b>-1.5</b> | <b>-1.0</b> | -0.6 | <b>-1.2</b> |
| ubiquitin-conjugating enzyme E2, J1 (UBC6 homolog, yeast) | UBE2J1 | <b>-1.2</b> | -0.7        | -0.3 | <b>-1.1</b> |
| ubiquitin-conjugating enzyme E2, J1 (UBC6 homolog, yeast) | UBE2J1 | <b>-1.3</b> | -0.6        | -0.5 | <b>-1.2</b> |
| ubiquitin-conjugating enzyme E2, J1 (UBC6 homolog, yeast) | UBE2J1 | <b>-1.1</b> | -0.4        | -0.4 | -0.9        |
| UDP-N-acetylglucosamine pyrophosphorylase 1               | UAP1   | -0.6        | <b>-1.6</b> | -0.3 | -0.9        |
| unc-13 homolog C (C. elegans)                             | UNC13C | <b>-1.1</b> | <b>-1.6</b> | -0.7 | <b>-1.3</b> |
| unc-13 homolog C (C. elegans)                             | UNC13C | <b>-1.1</b> | <b>-1.3</b> | -0.6 | <b>-1.3</b> |
| unc-13 homolog C (C. elegans)                             | UNC13C | -0.8        | <b>-1.1</b> | -0.5 | <b>-1.1</b> |
| valyl-tRNA synthetase 2                                   | VARS2  | -0.5        | -0.7        | -0.5 | <b>-1.1</b> |
| valyl-tRNA synthetase 2                                   | VARS2  | -0.5        | -0.6        | -0.4 | -0.8        |
| vascular endothelial growth factor B                      | VEGFB  | -0.4        | -0.7        | -0.4 | -0.9        |
| vitamin K epoxide reductase complex, subunit 1            | VKORC1 | -0.7        | <b>-1.0</b> | -0.3 | <b>-1.0</b> |
| v-myb myeloblastosis viral oncogene homolog (avian)       | MYB    | -0.8        | <b>-1.4</b> | -0.5 | <b>-1.0</b> |
| WD repeat domain 4                                        | WDR4   | -0.6        | -0.7        | -0.5 | <b>-1.2</b> |
| X-box binding protein 1                                   | XBP1   | -0.4        | -0.9        | -0.3 | -0.9        |

**LogRatios for down-regulated genes at 48 h in all cell lines**

**Two-fold changes are in green bold**

| <b>Gene Descriptor</b>                                                             | <b>Symbol</b> | <b>U266<br/>48h</b> | <b>MM.1s<br/>48h</b> | <b>8226/S<br/>48h</b> | <b>KMS11<br/>48h</b> |
|------------------------------------------------------------------------------------|---------------|---------------------|----------------------|-----------------------|----------------------|
| 3-oxoacid CoA transferase 1                                                        | OXCT1         | -0.6                | -0.5                 | -0.2                  | -0.7                 |
| 8D6 antigen                                                                        | 8D6A          | <b>-1.4</b>         | <b>-2.3</b>          | -0.8                  | <b>-2.2</b>          |
| activated RNA polymerase II transcription cofactor 4                               | PC4           | <b>-1.2</b>         | <b>-1.5</b>          | -0.5                  | <b>-1.2</b>          |
| acylphosphatase 1, erythrocyte (common) type                                       | ACYP1         | <b>-1.8</b>         | <b>-1.2</b>          | -0.4                  | -0.4                 |
| adenosine deaminase                                                                | ADA           | <b>-1.0</b>         | -0.2                 | -0.3                  | <b>-1.7</b>          |
| Aminoacylase 1-like 2                                                              | ACY1L2        | -0.9                | <b>-1.8</b>          | -0.6                  | <b>-1.8</b>          |
| Aminoacylase 1-like 2                                                              | ACY1L2        | -0.9                | <b>-1.3</b>          | -0.3                  | <b>-1.7</b>          |
| AT rich interactive domain 2 (ARID, RFX-like)                                      | ARID2         | -0.5                | -0.7                 | -0.8                  | <b>-1.4</b>          |
| Atherin                                                                            | LOC90378      | -0.9                | -0.8                 | -0.3                  | <b>-1.0</b>          |
| ATP citrate lyase                                                                  | ACLY          | -0.3                | -0.7                 | -0.3                  | -0.9                 |
| ATP synthase, H <sup>+</sup> transporting, mitochondrial F1 complex, delta subunit | ATP5D         | -0.6                | -0.7                 | -0.5                  | -0.9                 |
| ATPase type 13A                                                                    | ATP13A        | -0.8                | -0.5                 | -0.3                  | -0.9                 |
| ATPase, Ca <sup>++</sup> transporting, cardiac muscle, slow twitch 2               | ATP2A2        | -0.6                | -0.8                 | -0.4                  | -0.7                 |
| ATPase, Class I, type 8B, member 2                                                 | ATP8B2        | -0.4                | <b>-1.4</b>          | -0.5                  | <b>-1.7</b>          |
| baculoviral IAP repeat-containing 5 (survivin)                                     | BIRC5         | <b>-1.0</b>         | <b>-1.7</b>          | -0.6                  | -0.3                 |
| baculoviral IAP repeat-containing 5 (survivin)                                     | BIRC5         | <b>-1.2</b>         | <b>-1.6</b>          | -0.2                  | -0.3                 |
| BCL2-like 1                                                                        | BCL2L1        | <b>-1.0</b>         | <b>-1.8</b>          | -0.6                  | <b>-1.8</b>          |
| BCL2-like 1                                                                        | BCL2L1        | <b>-1.3</b>         | <b>-1.8</b>          | -0.5                  | <b>-1.4</b>          |
| BCL2-like 1 /// BCL2-like 1                                                        | BCL2L1        | -0.9                | <b>-1.5</b>          | -0.6                  | <b>-1.4</b>          |
| bicaudal D homolog 2 (Drosophila)                                                  | BICD2         | -0.8                | -0.5                 | -0.5                  | <b>-1.5</b>          |
| bicaudal D homolog 2 (Drosophila)                                                  | BICD2         | -0.7                | -0.3                 | -0.8                  | -0.9                 |
| brain acyl-CoA hydrolase                                                           | BACH          | -0.9                | <b>-1.5</b>          | -0.4                  | -0.6                 |

|                                                                                   |           |             |             |             |             |
|-----------------------------------------------------------------------------------|-----------|-------------|-------------|-------------|-------------|
| BTB (POZ) domain containing 3                                                     | BTBD3     | -0.8        | <b>-1.0</b> | <b>-1.1</b> | <b>-1.5</b> |
| BUB1 budding uninhibited by benzimidazoles 1 homolog (yeast)                      | BUB1      | <b>-1.0</b> | <b>-1.9</b> | -0.3        | -0.3        |
| Butyrophilin, subfamily 3, member A2                                              | BTN3A2    | <b>-2.3</b> | <b>-2.0</b> | -0.7        | <b>-4.5</b> |
| butyrophilin, subfamily 3, member A2                                              | BTN3A2    | <b>-1.9</b> | <b>-1.1</b> | -0.6        | <b>-2.5</b> |
| butyrophilin, subfamily 3, member A3                                              | BTN3A3    | <b>-2.3</b> | <b>-1.0</b> | -0.7        | <b>-2.6</b> |
| Casein kinase 1, epsilon                                                          | CSNK1E    | -0.6        | <b>-1.0</b> | -0.6        | -0.8        |
| casein kinase 1, epsilon                                                          | CSNK1E    | -0.4        | -0.5        | -0.4        | -0.6        |
| caveolin 1, caveolae protein, 22kDa                                               | CAV1      | <b>-1.2</b> | <b>-1.5</b> | -0.9        | <b>-2.4</b> |
| <b>caveolin 1, caveolae protein, 22kDa</b>                                        | CAV1      | <b>-1.2</b> | <b>-1.3</b> | <b>-1.0</b> | <b>-2.2</b> |
| caveolin 2                                                                        | CAV2      | -0.6        | -0.7        | <b>-1.0</b> | <b>-1.7</b> |
| Cbp/p300-interacting transactivator, with Glu/Asp-rich carboxy-terminal domain, 2 | CITED2    | -0.5        | <b>-1.0</b> | -0.7        | -0.8        |
| Cbp/p300-interacting transactivator, with Glu/Asp-rich carboxy-terminal domain, 2 | CITED2    | -0.2        | -0.6        | -0.8        | -0.5        |
| CDNA: FLJ22198 fis, clone HRC01218                                                |           | -0.5        | <b>-1.0</b> | -0.6        | -0.5        |
| cell division cycle 25A                                                           | CDC25A    | <b>-1.5</b> | <b>-1.5</b> | -0.3        | <b>-1.6</b> |
| cell division cycle associated 4                                                  | CDCA4     | -0.5        | -0.5        | -0.4        | -0.7        |
| ceroid-lipofuscinosis, neuronal 6, late infantile, variant                        | CLN6      | -0.6        | <b>-1.3</b> | -0.5        | <b>-2.1</b> |
| CGI-100 protein                                                                   | CGI-100   | <b>-1.1</b> | -0.8        | -0.4        | <b>-1.3</b> |
| CGI-146 protein                                                                   | PNAS-4    | -0.3        | -0.5        | -0.4        | -0.4        |
| chromosome 14 open reading frame 147                                              | C14orf147 | -0.6        | -0.5        | -0.3        | -0.8        |
| chromosome 16 open reading frame 34                                               | C16orf34  | -0.4        | -0.7        | -0.2        | -0.3        |
| chromosome 19 open reading frame 13                                               | C19orf13  | -0.5        | -0.3        | -0.4        | -0.6        |
| Chromosome 19 open reading frame 6                                                | C19orf6   | -0.4        | -0.4        | <b>-1.0</b> | -0.9        |
| chromosome 19 open reading frame 6                                                | C19orf6   | -0.3        | -0.5        | <b>-1.0</b> | -0.4        |
| chromosome 21 open reading frame 56                                               | C21orf56  | -0.4        | -0.4        | -0.5        | -0.8        |
| chromosome 22 open reading frame 9                                                | C22orf9   | <b>-1.3</b> | <b>-1.3</b> | -0.3        | <b>-2.8</b> |
| chromosome 7 open reading frame 19                                                | C7orf19   | -0.8        | -0.6        | -0.5        | <b>-1.3</b> |
| chromosome 9 open reading frame 86                                                | C9orf86   | -0.4        | -0.4        | -0.5        | -0.7        |
| chromosome condensation 1                                                         | CHC1      | -0.3        | <b>-1.0</b> | -0.5        | -0.9        |
| cisplatin resistance related protein CRR9p                                        | CRR9      | <b>-1.4</b> | -0.7        | -0.5        | <b>-1.2</b> |
| cisplatin resistance related protein CRR9p                                        | CRR9      | <b>-1.2</b> | -0.5        | -0.3        | -0.7        |
| Cleavage and polyadenylation specific factor 6, 68kDa                             | CPSF6     | -0.5        | <b>-1.1</b> | -0.7        | -0.8        |
| Hs.80305 /len=1196                                                                |           | -0.6        | -0.7        | -0.6        | -0.7        |
| coenzyme Q4 homolog (yeast)                                                       | COQ4      | -0.7        | -0.1        | -0.4        | -0.4        |
| CLONE=IMAGE:981825 /UG=Hs.103135 ESTs                                             |           | -0.4        | <b>-1.0</b> | <b>-1.0</b> | -0.6        |
| CLONE=IMAGE:1407864 /UG=Hs.180446                                                 |           | <b>-1.2</b> | -0.5        | -0.7        | <b>-1.1</b> |
| karyopherin (importin) beta 1                                                     |           | <b>-1.0</b> | -0.4        | -0.5        | <b>-1.2</b> |
| CLONE=IMAGE:1407864 /UG=Hs.180446                                                 |           | <b>-1.0</b> | -0.4        | -0.5        | <b>-1.2</b> |
| karyopherin (importin) beta 1                                                     |           | <b>-1.0</b> | -0.4        | -0.5        | <b>-1.2</b> |
| Hs.283906 Homo sapiens BAC clone RP11-244E6 from 2                                |           | -0.7        | -0.7        | -0.3        | -0.6        |
| CLONE=IMAGE:2108389 /UG=Hs.2910 phosphoribosyl pyrophosphate synthetase 2         |           | <b>-1.1</b> | <b>-1.2</b> | -0.5        | <b>-1.4</b> |
| CLONE=IMAGE:2273535 /UG=Hs.123370 ESTs                                            |           | -0.8        | <b>-1.1</b> | -0.5        | <b>-1.0</b> |
| Human DNA sequence from clone RP11-16H23 on chromosome 10.                        |           | -0.4        | -0.4        | -0.4        | -0.3        |
| Hs.173705 Homo sapiens cDNA: FLJ22050 fis, clone HEP09454                         |           | -0.8        | -0.6        | -0.6        | -0.7        |
| CLONE=IMAGE:3219006 /UG=Hs.145020 ESTs                                            |           | -0.6        | -0.5        | -0.5        | -0.8        |

|                                                       |               |      |      |      |      |
|-------------------------------------------------------|---------------|------|------|------|------|
| CLONE=IMAGE:4277696 /UG=Hs.5181                       |               | -1.2 | -1.2 | -0.7 | -2.2 |
| CLONE=IMAGE:4701118 /UG=Hs.180446                     |               | -1.1 | -0.5 | -0.8 | -1.3 |
| CLONE=IMAGE:261468 /UG=Hs.251865 ESTs                 |               | -0.6 | -1.5 | -0.2 | -1.0 |
| CLONE=IMAGE:308683 /UG=Hs.26425 ESTs                  |               | -0.6 | -0.6 | -0.6 | -1.1 |
| CSE1 chromosome segregation 1-like (yeast)            | CSE1L         | -1.1 | -1.0 | -0.3 | -0.5 |
| CSE1 chromosome segregation 1-like (yeast)            | CSE1L         | -0.8 | -0.9 | -0.2 | -0.4 |
| CSRP2 binding protein                                 | CSRP2BP       | -0.4 | -0.5 | -0.6 | -0.8 |
| CTP synthase                                          | CTPS          | -0.7 | -0.5 | -0.2 | -0.9 |
| C-type lectin, superfamily member 12                  | CLECSF12      | -0.3 | -1.1 | -0.7 | -1.2 |
| cyclin A2                                             | CCNA2         | -1.4 | -1.8 | -0.2 | -0.3 |
| cyclin D1 (PRAD1: parathyroid adenomatosis 1)         | CCND1         | -1.9 | -2.6 | -0.5 | -2.0 |
| cyclin D2                                             | CCND2         | -0.9 | -1.4 | -1.3 | -2.0 |
| cyclin D2                                             | CCND2         | -0.6 | -1.0 | -1.0 | -1.0 |
| cyclin D2                                             | CCND2         | -0.6 | -0.5 | -0.3 | -0.7 |
| cyclin F                                              | CCNF          | -0.9 | -4.8 | -0.4 | -1.1 |
| cytoskeleton-associated protein 4                     | CKAP4         | -0.6 | -1.4 | -0.5 | -1.2 |
| cytoskeleton-associated protein 4                     | CKAP4         | -0.7 | -1.1 | -0.4 | -0.9 |
| DEAD (Asp-Glu-Ala-Asp) box polypeptide 46             | DDX46         | -0.6 | -0.8 | -0.3 | -0.8 |
| DEAD/H (Asp-Glu-Ala-Asp/His) box polypeptide 11       | DDX11         | -0.8 | -1.2 | -0.7 | -1.6 |
| DEAH (Asp-Glu-Ala-His) box polypeptide 15             | DHX15         | -0.4 | -0.8 | -0.2 | -1.0 |
| deleted in lymphocytic leukemia, 1                    | DLEU1         | -0.3 | -1.2 | -0.9 | -1.5 |
| Der1-like domain family, member 3                     | DERL3         | -1.7 | -0.9 | -0.5 | -2.1 |
| dihydrofolate reductase                               | DHFR          | -1.4 | -1.5 | -0.4 | -0.5 |
| DKFZP586L0724 protein                                 | DKFZP586L0724 | -0.4 | -0.2 | -0.4 | -0.6 |
| DNA replication complex GINS protein PSF2             | Pfs2          | -2.2 | -1.4 | -0.4 | -0.7 |
| DnaJ (Hsp40) homolog, subfamily C, member 10          | DNAJC10       | -0.8 | -0.9 | -0.6 | -1.1 |
| dolichyl-phosphate mannosyltransferase polypeptide 3  | DPM3          | -1.5 | -0.7 | -0.4 | -0.9 |
| dUTP pyrophosphatase                                  | DUT           | -1.1 | -1.3 | -0.5 | -1.1 |
| E2F transcription factor 2                            | E2F2          | -3.7 | -1.6 | -0.7 | -1.6 |
| <b>Elongation factor, RNA polymerase II, 2</b>        | ELL2          | -3.0 | -1.3 | -1.5 | -3.1 |
| elongation factor, RNA polymerase II, 2               | ELL2          | -1.0 | -0.4 | -0.7 | -1.3 |
| eukaryotic translation elongation factor 1 epsilon 1  | EEF1E1        | -0.5 | -0.6 | -0.4 | -0.8 |
| eukaryotic translation initiation factor 1A, X-linked | EIF1AX        | -1.1 | -0.7 | -0.3 | -1.1 |
| fatty acid binding protein 5 (psoriasis-associated)   | FABP5         | -0.5 | -1.6 | -0.5 | -1.0 |
| fatty acid synthase                                   | FASN          | -1.5 | -1.9 | -0.7 | -3.0 |
| F-box protein 45                                      | FBXO45        | -0.4 | -0.3 | -0.3 | -1.0 |
| F-box protein 9                                       | FBXO9         | -0.3 | -0.5 | -0.9 | -0.6 |
| F-box protein 9                                       | FBXO9         | -0.3 | -0.4 | -0.9 | -0.4 |
| F-box protein 9                                       | FBXO9         | -0.3 | -0.3 | -0.9 | -0.5 |
| FK506 binding protein 11, 19 kDa                      | FKBP11        | -2.3 | -1.6 | -0.5 | -2.7 |
| FK506 binding protein 11, 19 kDa                      | FKBP11        | -2.3 | -1.5 | -0.5 | -2.2 |
| fumarate hydratase                                    | FH            | -0.4 | -0.8 | -0.3 | -0.9 |
| fumarate hydratase                                    | FH            | -0.5 | -0.7 | -0.2 | -0.6 |
| GAJ protein                                           | GAJ           | -2.1 | -2.6 | -0.6 | -0.7 |
| general transcription factor IIIA                     | GTF3A         | -0.8 | -0.7 | -0.8 | -1.0 |
| general transcription factor IIIA                     | GTF3A         | -0.8 | -0.7 | -0.7 | -1.0 |
| glucocorticoid induced transcript 1                   | GLCC11        | -2.3 | -1.7 | -0.4 | -2.0 |
| glucocorticoid induced transcript 1                   | GLCC11        | -1.9 | -1.1 | -0.6 | -1.7 |
| glucocorticoid induced transcript 1                   | GLCC11        | -1.9 | -1.0 | -0.5 | -1.7 |

|                                                                       |               |             |             |      |             |
|-----------------------------------------------------------------------|---------------|-------------|-------------|------|-------------|
| glutaminase                                                           | GLS           | -0.3        | -0.8        | -0.4 | -0.7        |
| glycosyltransferase 25 domain containing 1                            | GLT25D1       | -0.7        | <b>-1.0</b> | -0.4 | -0.9        |
| glycosyltransferase AD-017                                            | AD-017        | <b>-1.1</b> | -0.9        | -0.6 | -0.5        |
| golgi associated, gamma adaptin ear containing, ARF binding protein 2 | GGA2          | -0.4        | -0.4        | -0.3 | -0.6        |
| growth and transformation-dependent protein                           | E2IG5         | -0.4        | -0.4        | -0.2 | <b>-1.2</b> |
| H3 histone, family 3B (H3.3B)                                         | H3F3B         | <b>-2.2</b> | <b>-2.3</b> | -0.8 | <b>-1.1</b> |
| heat shock 70kDa protein 14                                           | HSPA14        | -0.4        | -0.4        | -0.3 | -0.6        |
| Helicase, lymphoid-specific                                           | HELLS         | <b>-2.2</b> | <b>-2.4</b> | -0.5 | <b>-1.8</b> |
| Helicase, lymphoid-specific                                           | HELLS         | <b>-1.7</b> | <b>-2.2</b> | -0.4 | <b>-1.4</b> |
| heterogeneous nuclear ribonucleoprotein A3                            | HNRPA3        | -0.7        | -0.5        | -0.2 | -0.8        |
| heterogeneous nuclear ribonucleoprotein C (C1/C2)                     | HNRPC         | <b>-1.0</b> | <b>-1.2</b> | -0.7 | <b>-1.3</b> |
| high mobility group AT-hook 1                                         | HMGA1         | <b>-1.2</b> | <b>-1.8</b> | -0.9 | <b>-1.8</b> |
| high mobility group AT-hook 1                                         | HMGA1         | <b>-1.0</b> | -0.9        | -0.6 | <b>-1.1</b> |
| high-mobility group box 1                                             | HMGB1         | -0.5        | <b>-1.1</b> | -0.4 | -0.9        |
| HMT1 hnRNP methyltransferase-like 2 (S. cerevisiae)                   | HRMT1L2       | -0.4        | -0.7        | -0.5 | <b>-1.2</b> |
| hydroxysteroid (17-beta) dehydrogenase 8                              | HSD17B8       | -0.5        | <b>-1.0</b> | -0.6 | -0.9        |
| Hypothetical LOC388796                                                |               | -0.5        | -0.5        | -0.5 | -0.7        |
| Hypothetical LOC388796                                                |               | -0.3        | -0.4        | -0.3 | -0.7        |
| Hypothetical LOC402578                                                |               | <b>-1.1</b> | -0.7        | -0.7 | <b>-1.6</b> |
| Hypothetical LOC402578                                                |               | <b>-1.1</b> | <b>-1.1</b> | -0.3 | <b>-1.5</b> |
| hypothetical protein                                                  | LOC387882     | <b>-1.0</b> | <b>-2.3</b> | -0.9 | -0.9        |
| hypothetical protein DKFZp434K1815                                    | DKFZp434K1815 | -0.8        | -0.3        | -0.5 | -0.8        |
| hypothetical protein FLJ10154                                         | FLJ10154      | -0.4        | -0.4        | -0.5 | -0.3        |
| hypothetical protein FLJ12953 similar to Mus musculus D3Mm3e          | FLJ12953      | -0.7        | <b>-1.1</b> | -0.5 | -0.6        |
| hypothetical protein FLJ20364                                         | FLJ20364      | -0.9        | <b>-1.2</b> | -0.4 | -0.3        |
| hypothetical protein FLJ20425                                         | LYAR          | -0.5        | -0.9        | -0.3 | <b>-1.5</b> |
| hypothetical protein FLJ35036                                         | FLJ35036      | <b>-1.0</b> | -0.6        | -0.4 | <b>-1.1</b> |
| Hypothetical protein FLJ35036                                         | FLJ35036      | -0.8        | -0.4        | -0.4 | <b>-1.0</b> |
| hypothetical protein FLJ35036                                         | FLJ35036      | -0.6        | -0.3        | -0.6 | -0.6        |
| hypothetical protein H41                                              | H41           | -0.5        | <b>-1.1</b> | -0.5 | <b>-1.3</b> |
| hypothetical protein H41                                              | H41           | -0.3        | -0.9        | -0.5 | -0.9        |
| hypothetical protein H41                                              | H41           | -0.3        | -0.4        | -0.4 | -0.6        |
| hypothetical protein HSPC268                                          | HSPC268       | <b>-2.3</b> | -0.6        | -0.8 | -0.5        |
| hypothetical protein HSPC268                                          | HSPC268       | -0.8        | -0.3        | -0.6 | -0.5        |
| hypothetical protein LOC124512                                        | LOC124512     | -0.4        | -0.5        | -0.3 | -0.6        |
| hypothetical protein LOC202781                                        | LOC202781     | -0.5        | -0.8        | -0.6 | -0.3        |
| hypothetical protein LOC221362                                        | LOC221362     | -0.7        | -0.5        | -0.5 | -0.4        |
| hypothetical protein LOC339287                                        | LOC339287     | -0.7        | -0.6        | -0.7 | -0.8        |
| hypothetical protein LOC348094                                        | LOC348094     | -0.2        | -0.8        | -0.4 | <b>-1.5</b> |
| hypothetical protein MAC30                                            | MAC30         | <b>-2.1</b> | <b>-2.1</b> | -0.3 | <b>-1.1</b> |
| hypothetical protein MAC30                                            | MAC30         | <b>-1.9</b> | <b>-2.2</b> | -0.3 | <b>-1.1</b> |
| hypothetical protein MGC33867                                         | MGC33867      | -0.6        | -0.9        | -0.4 | <b>-1.2</b> |
| hypothetical protein MGC4172                                          | MGC4172       | -0.8        | <b>-1.3</b> | -0.7 | <b>-2.8</b> |
| hypothetical protein MGC5508                                          | MGC5508       | -0.5        | -0.5        | -0.5 | <b>-1.1</b> |
| hypoxia-inducible protein 2                                           | HIG2          | <b>-1.2</b> | <b>-1.7</b> | -0.4 | <b>-1.7</b> |
| immunoglobulin superfamily, member 4                                  | IGSF4         | -0.8        | <b>-1.6</b> | -0.4 | <b>-1.1</b> |
| Immunoglobulin superfamily, member 4                                  | IGSF4         | -0.6        | <b>-1.5</b> | -0.4 | <b>-1.2</b> |
| insulin induced gene 1                                                | INSIG1        | <b>-2.3</b> | <b>-3.7</b> | -0.3 | <b>-1.9</b> |

|                                                              |               |      |      |      |      |
|--------------------------------------------------------------|---------------|------|------|------|------|
| insulin induced gene 1                                       | INSIG1        | -2.4 | -3.5 | -0.2 | -1.7 |
| insulin induced gene 1                                       | INSIG1        | -2.3 | -3.3 | -0.4 | -1.5 |
| interferon regulatory factor 4                               | IRF4          | -1.5 | -1.1 | -0.3 | -0.9 |
| interleukin enhancer binding factor 3, 90kDa                 | ILF3          | -0.3 | -0.9 | -0.7 | -1.7 |
| interleukin enhancer binding factor 3, 90kDa                 | ILF3          | -0.3 | -0.7 | -0.5 | -1.0 |
| Intermediate filament protein syncoilin                      | SYNCOIL1<br>N | -1.3 | -0.8 | -0.6 | -1.0 |
| jun D proto-oncogene                                         | JUND          | -1.3 | -1.7 | -0.8 | -0.9 |
| KH-type splicing regulatory protein (FUSE binding protein 2) | KHSRP         | -0.7 | -0.7 | -1.3 | -1.7 |
| KIAA0152 gene product                                        | KIAA0152      | -0.7 | -0.3 | -0.4 | -1.2 |
| KIAA0186 gene product                                        | KIAA0186      | -1.8 | -2.3 | -0.2 | -1.0 |
| KIAA0877 protein                                             | KIAA0877      | -0.4 | -2.0 | -0.2 | -1.1 |
| lamin B1                                                     | LMNB1         | -0.5 | -1.7 | -0.7 | -0.7 |
| LYRIC/3D3                                                    | LYRIC         | -1.0 | -0.3 | -0.6 | -0.9 |
| LYRIC/3D3                                                    | LYRIC         | -0.4 | -0.4 | -0.3 | -0.7 |
| MAD2 mitotic arrest deficient-like 1 (yeast)                 | MAD2L1        | -1.3 | -2.1 | -0.5 | -0.7 |
| MAD2 mitotic arrest deficient-like 1 (yeast)                 | MAD2L1        | -1.5 | -2.0 | -0.4 | -0.7 |
| MCM4 minichromosome maintenance deficient 4 (S. cerevisiae)  | MCM4          | -2.0 | -2.7 | -0.4 | -1.4 |
| MCM4 minichromosome maintenance deficient 4 (S. cerevisiae)  | MCM4          | -1.8 | -2.1 | -0.4 | -1.1 |
| MCM4 minichromosome maintenance deficient 4 (S. cerevisiae)  | MCM4          | -1.3 | -2.1 | -0.3 | -0.9 |
| MCM7 minichromosome maintenance deficient 7 (S. cerevisiae)  | MCM7          | -1.4 | -2.2 | -0.8 | -1.7 |
| MCM7 minichromosome maintenance deficient 7 (S. cerevisiae)  | MCM7          | -1.3 | -1.8 | -0.8 | -1.2 |
| mesoderm development candidate 2                             | MESDC2        | -0.5 | -0.9 | -0.2 | -0.8 |
| methylenetetrahydrofolate dehydrogenase (NADP+ dependent)    | MTHFD1        | -0.7 | -0.8 | -0.3 | -1.0 |
| mitochondrial ribosomal protein L23                          | MRPL23        | -0.7 | -0.7 | -0.4 | -0.8 |
| mitochondrial ribosomal protein L24                          | MRPL24        | -0.4 | -0.5 | -0.7 | -0.5 |
| mitochondrial ribosomal protein L38                          | MRPL38        | -0.6 | -0.5 | -0.3 | -0.8 |
| mitochondrial ribosomal protein S15                          | MRPS15        | -0.3 | -0.4 | -0.2 | -0.4 |
| M-phase phosphoprotein 9                                     | MPHOSPH<br>9  | -1.2 | -0.6 | -0.2 | -0.9 |
| MRNA; cDNA DKFZp564C0762 (from clone DKFZp564C0762)          |               | -1.0 | -1.2 | -0.7 | -1.0 |
| mutS homolog 6 (E. coli)                                     | MSH6          | -0.6 | -1.0 | -0.2 | -0.7 |
| MYC-associated zinc finger protein                           | MAZ           | -1.0 | -1.5 | -0.6 | -2.3 |
| MYC-associated zinc finger protein                           | MAZ           | -0.8 | -0.8 | -0.2 | -1.4 |
| Myosin VA (heavy polypeptide 12, myosin)                     | MYO5A         | -0.3 | -0.5 | -0.6 | -0.3 |
| NADH dehydrogenase (ubiquinone) flavoprotein 2, 24kDa        | NDUFV2        | -0.3 | -0.5 | -0.4 | -0.4 |
| nuclear factor (erythroid-derived 2)-like 3                  | NFE2L3        | -0.7 | -0.7 | -0.8 | -1.1 |
| nuclear mitotic apparatus protein 1                          | NUMA1         | -0.7 | -0.4 | -0.2 | -0.7 |
| nucleolar protein 5A (56kDa with KKE/D repeat)               | NOL5A         | -0.6 | -0.4 | -0.5 | -1.4 |
| nucleostemin                                                 | NS            | -0.9 | -0.4 | -0.4 | -1.2 |
| Nudix (nucleoside diphosphate linked moiety X)-type motif 3  | NUDT3         | -0.5 | -0.5 | -0.3 | -0.9 |
| Nudix (nucleoside diphosphate linked moiety X)-type motif 5  | NUDT5         | -1.0 | -0.4 | -0.5 | -1.7 |
| Opa-interacting protein 5                                    | OIP5          | -0.8 | -1.7 | -0.3 | -0.4 |

|                                                                       |          |             |             |             |             |
|-----------------------------------------------------------------------|----------|-------------|-------------|-------------|-------------|
| PAI-1 mRNA-binding protein                                            | PAI-RBP1 | -0.8        | <b>-1.0</b> | -0.6        | <b>-1.7</b> |
| Paternally expressed 10                                               | PEG10    | <b>-1.5</b> | <b>-2.3</b> | -0.7        | <b>-1.7</b> |
| Paternally expressed 10                                               | PEG10    | <b>-1.3</b> | <b>-1.9</b> | -0.8        | <b>-1.2</b> |
| phosphatidylinositol glycan, class F                                  | PIGF     | <b>-1.0</b> | -0.6        | -0.6        | <b>-1.0</b> |
| phosphatidylinositol glycan, class F                                  | PIGF     | -0.8        | -0.2        | -0.6        | -0.5        |
| phospholipase A2, group XIIA /// phospholipase A2, group XIIA         | PLA2G12A | <b>-1.0</b> | <b>-1.0</b> | -0.3        | -0.9        |
| phosphoribosyl pyrophosphate amidotransferase                         | PPAT     | -0.3        | -0.5        | -0.3        | <b>-1.1</b> |
| phosphoribosylaminoimidazole carboxylase                              | PAICS    | -0.4        | -0.9        | -0.4        | <b>-1.1</b> |
| phosphoribosylaminoimidazole carboxylase                              | PAICS    | -0.5        | -0.8        | -0.3        | <b>-1.2</b> |
| POU domain, class 2, associating factor 1                             | POU2AF1  | <b>-1.4</b> | -0.9        | -0.5        | <b>-1.4</b> |
| PR domain containing 1, with ZNF domain                               | PRDM1    | <b>-1.0</b> | <b>-1.0</b> | -0.6        | <b>-1.1</b> |
| primase, polypeptide 1, 49kDa                                         | PRIM1    | -0.6        | <b>-1.1</b> | -0.4        | -0.8        |
| proapoptotic caspase adaptor protein                                  | PACAP    | <b>-4.0</b> | <b>-1.4</b> | -0.4        | <b>-2.8</b> |
| proapoptotic caspase adaptor protein                                  | PACAP    | <b>-2.7</b> | <b>-1.6</b> | -0.6        | <b>-3.2</b> |
| processing of precursor 5, ribonuclease P/MRP subunit (S. cerevisiae) | POP5     | -0.4        | -0.6        | -0.6        | -0.6        |
| proliferation-associated 2G4, 38kDa                                   | PA2G4    | -0.5        | -0.7        | -0.4        | <b>-1.3</b> |
| <b>protease, serine, 7 (enterokinase)</b>                             | PRSS7    | <b>-1.1</b> | <b>-4.5</b> | <b>-1.1</b> | <b>-3.8</b> |
| proteasome (prosome, macropain) subunit, beta type, 8                 | PSMB8    | -0.9        | -0.5        | -0.4        | <b>-1.7</b> |
| protein disulfide isomerase related protein                           | ERP70    | -0.8        | <b>-1.3</b> | -0.2        | <b>-1.6</b> |
| protein disulfide isomerase related protein                           | ERP70    | <b>-1.0</b> | <b>-1.1</b> | -0.3        | <b>-1.2</b> |
| protein kinase D3                                                     | PRKD3    | <b>-1.0</b> | -0.7        | -0.5        | -0.3        |
| protein kinase D3                                                     | PRKD3    | <b>-1.1</b> | -0.7        | -0.3        | -0.4        |
| protein kinase D3 /// protein kinase D3                               | PRKD3    | <b>-1.3</b> | -0.9        | -0.4        | -0.7        |
| putative dimethyladenosine transferase                                | HSA9761  | -0.3        | -0.9        | -0.6        | <b>-1.2</b> |
| R3H domain (binds single-stranded nucleic acids) containing           | R3HDM    | -0.4        | -0.5        | -0.5        | -0.7        |
| RAN binding protein 5                                                 | RANBP5   | -0.4        | -0.9        | -0.3        | <b>-1.0</b> |
| RAN binding protein 5                                                 | RANBP5   | -0.5        | -0.7        | -0.4        | -0.5        |
| replication factor C (activator 1) 3, 38kDa                           | RFC3     | <b>-1.2</b> | <b>-1.3</b> | -0.3        | -0.8        |
| replication factor C (activator 1) 4, 37kDa                           | RFC4     | <b>-1.3</b> | <b>-1.3</b> | -0.2        | -0.3        |
| Rho GDP dissociation inhibitor (GDI) alpha                            | ARHGDI   | -0.7        | <b>-1.4</b> | <b>-1.0</b> | <b>-1.7</b> |
| Rho GDP dissociation inhibitor (GDI) alpha                            | ARHGDI   | -0.7        | <b>-1.4</b> | <b>-1.0</b> | <b>-1.4</b> |
| Rho GDP dissociation inhibitor (GDI) alpha                            | ARHGDI   | -0.5        | -0.7        | -0.4        | -0.6        |
| Rho GDP dissociation inhibitor (GDI) alpha                            | ARHGDI   | -0.3        | -0.6        | -0.4        | -0.5        |
| Ribonuclease H1                                                       | RNASEH1  | -0.7        | -0.6        | -0.4        | <b>-1.5</b> |
| ribosomal protein L15                                                 | RPL15    | -0.6        | -0.4        | -0.2        | -0.5        |
| RNA binding motif protein 14                                          | RBM14    | -0.5        | -0.9        | -0.6        | -0.8        |
| RNA binding motif protein, X-linked                                   | RBMX     | -0.7        | -0.4        | -0.4        | -0.6        |
| SAM domain and HD domain 1                                            | SAMHD1   | <b>-1.0</b> | -0.6        | -0.4        | <b>-1.2</b> |
| SAM domain and HD domain 1                                            | SAMHD1   | -0.8        | -0.4        | -0.3        | <b>-1.1</b> |
| SEC14-like 1 (S. cerevisiae)                                          | SEC14L1  | -0.6        | -0.6        | -0.3        | <b>-1.1</b> |
| SEH1-like (S. cerevisiae)                                             | SEH1L    | -0.5        | -0.9        | -0.5        | <b>-1.4</b> |
| selenoprotein T                                                       | SELT     | -0.8        | <b>-1.0</b> | -0.7        | -0.8        |
| selenoprotein T                                                       | SELT     | -0.5        | -0.9        | -0.8        | -0.7        |
| SET translocation (myeloid leukemia-associated)                       | SET      | -0.2        | -0.4        | -0.7        | <b>-1.2</b> |
| seven in absentia homolog 2 (Drosophila)                              | SIAH2    | -0.5        | <b>-1.0</b> | -0.2        | <b>-1.4</b> |
| SFRS protein kinase 1                                                 | SRPK1    | -0.4        | -0.4        | -0.3        | -0.7        |
| sialyltransferase 1 (beta-galactoside alpha-2,6-sialyltransferase)    | SIAT1    | <b>-1.1</b> | -0.5        | -0.9        | <b>-1.7</b> |
| sialyltransferase 7D                                                  | SIAT7D   | <b>-1.1</b> | -0.9        | -0.3        | <b>-1.4</b> |

|                                                                   |           |             |             |      |             |
|-------------------------------------------------------------------|-----------|-------------|-------------|------|-------------|
| sialyltransferase 7D                                              | SIAT7D    | -0.7        | -0.9        | -0.3 | <b>-1.7</b> |
| signal sequence receptor, gamma                                   | SSR3      | -0.4        | <b>-1.1</b> | -0.7 | <b>-1.2</b> |
| signal sequence receptor, gamma                                   | SSR3      | -0.4        | -0.6        | -0.2 | -0.9        |
| Similar to 0610010D24Rik protein                                  |           | -0.8        | <b>-1.2</b> | -0.4 | -0.4        |
| similar to ribosomal protein L22                                  | LOC200916 | -0.3        | -0.3        | -0.4 | -0.6        |
| similar to RIKEN cDNA 2700047N05                                  | LOC134492 | -0.4        | -0.8        | -0.4 | -0.4        |
| Similar to RIKEN cDNA 2700049P18 gene                             | MGC57827  | -0.5        | <b>-2.3</b> | -0.3 | -0.3        |
| small nuclear ribonucleoprotein polypeptides B and B1             | SNRPB     | -0.6        | -0.7        | -0.2 | -0.6        |
| solute carrier family 16, member 3                                | SLC16A3   | <b>-1.7</b> | <b>-1.5</b> | -0.7 | <b>-1.4</b> |
| solute carrier family 16, member 3                                | SLC16A3   | <b>-1.6</b> | <b>-1.4</b> | -0.6 | -0.8        |
| solute carrier family 29 (nucleoside transporters), member 1      | SLC29A1   | -0.8        | <b>-1.3</b> | -0.5 | <b>-1.9</b> |
| solute carrier family 29 (nucleoside transporters), member 1      | SLC29A1   | -0.7        | <b>-1.0</b> | -0.5 | <b>-1.4</b> |
| solute carrier family 39 (zinc transporter), member 4             | SLC39A4   | <b>-1.0</b> | -0.8        | -0.4 | -0.8        |
| spermidine synthase                                               | SRM       | -0.5        | -0.7        | -0.4 | <b>-1.7</b> |
| splicing factor, arginine/serine-rich 2                           | SFRS2     | -0.4        | -0.8        | -0.4 | -0.7        |
| splicing factor, arginine/serine-rich 2                           | SFRS2     | -0.3        | -0.6        | -0.4 | -0.6        |
| splicing factor, arginine/serine-rich 3                           | SFRS3     | -0.4        | -0.4        | -0.3 | -0.4        |
| splicing factor, arginine/serine-rich 6                           | SFRS6     | -0.8        | -0.3        | -0.6 | -0.6        |
| squalene epoxidase                                                | SQLE      | <b>-1.4</b> | <b>-2.6</b> | -0.2 | <b>-1.9</b> |
| stem-loop (histone) binding protein                               | SLBP      | -0.6        | -0.7        | -0.3 | <b>-1.1</b> |
| stromal cell-derived factor 2-like 1                              | SDF2L1    | <b>-1.6</b> | -0.7        | -0.9 | <b>-1.3</b> |
| structure specific recognition protein 1                          | SSRP1     | -0.5        | -0.8        | -0.2 | <b>-1.1</b> |
| Synaptotagmin binding, cytoplasmic RNA interacting protein        | SYNCRIP   | -0.7        | -0.9        | -0.4 | <b>-1.4</b> |
| synaptotagmin binding, cytoplasmic RNA interacting protein        | SYNCRIP   | -0.5        | -0.6        | -0.4 | <b>-1.0</b> |
| syndecan 1                                                        | SDC1      | <b>-1.7</b> | -0.9        | -0.3 | <b>-3.3</b> |
| TATA box binding protein (TBP)-associated factor, 28kDa           | TAF11     | -0.3        | -0.6        | -0.5 | -0.4        |
| TEA domain family member 1 (SV40 transcriptional enhancer factor) | TEAD1     | -0.4        | -0.5        | -0.3 | -0.5        |
| tetratricopeptide repeat domain 3                                 | TTC3      | -0.3        | -0.4        | -0.4 | -0.5        |
| thioredoxin domain containing 7 (protein disulfide isomerase)     | TXNDC7    | <b>-1.2</b> | <b>-1.2</b> | -0.3 | <b>-1.3</b> |
| thymine-DNA glycosylase                                           | TDG       | -0.5        | -0.4        | -0.6 | -0.8        |
| tissue inhibitor of metalloproteinase 2                           | TIMP2     | <b>-1.4</b> | -0.9        | -0.5 | -0.6        |
| tissue inhibitor of metalloproteinase 2                           | TIMP2     | <b>-1.2</b> | -0.6        | -0.5 | -0.4        |
| Transcribed locus, moderately similar to NP_689672.2              |           | -0.4        | -0.6        | -0.5 | -0.5        |
| Transcribed locus, moderately similar to NP_689672.2              |           | -0.4        | -0.6        | -0.6 | -0.3        |
| transcription elongation regulator 1                              | TCERG1    | -0.5        | -0.4        | -0.2 | -0.7        |
| E2A immunoglobulin enhancer binding factors E12/E47               | TCF3      | <b>-1.8</b> | <b>-1.1</b> | -0.3 | <b>-1.3</b> |
| E2A immunoglobulin enhancer binding factors E12/E47               | TCF3      | -0.9        | -0.4        | -0.3 | -0.3        |
| transcription factor Dp-1                                         | TFDP1     | <b>-1.3</b> | <b>-3.7</b> | -0.6 | <b>-2.1</b> |
| transcription factor Dp-1                                         | TFDP1     | <b>-1.0</b> | <b>-2.0</b> | -0.3 | <b>-1.2</b> |
| translocation associated membrane protein 2                       | TRAM2     | <b>-2.0</b> | <b>-1.5</b> | -0.6 | <b>-1.1</b> |
| translocation associated membrane protein 2                       | TRAM2     | <b>-1.4</b> | <b>-1.3</b> | -0.8 | <b>-1.0</b> |



|                                                                    |                       |             |             |             |             |
|--------------------------------------------------------------------|-----------------------|-------------|-------------|-------------|-------------|
| translocation protein 1                                            | TLOC1                 | -0.3        | -0.7        | -0.5        | -0.8        |
| tribbles homolog 1 (Drosophila)                                    | TRIB1                 | <b>-1.3</b> | <b>-1.6</b> | <b>-1.3</b> | -0.3        |
| tubulin, gamma 1                                                   | TUBG1                 | <b>-1.4</b> | <b>-1.0</b> | -0.7        | -0.8        |
| <b>tumor necrosis factor receptor superfamily, member 17</b>       | TNFRSF17              | <b>-1.8</b> | <b>-1.5</b> | <b>-1.0</b> | <b>-2.7</b> |
| Tyr 3-monooxygenase/tryptophan 5-monooxygenase activation protein  | YWHAH                 | -0.8        | <b>-1.6</b> | -0.3        | -0.7        |
| ubiquinol-cytochrome c reductase, Rieske iron-sulfur polypeptide 1 | UQCRFS1               | -0.3        | -0.3        | -0.3        | -0.5        |
| ubiquitin-conjugating enzyme E2 variant 1                          | UBE2V1 ///<br>Kua-UEV | -0.2        | -0.5        | -0.4        | -0.5        |
| ubiquitin-conjugating enzyme E2, J1 (UBC6 homolog, yeast)          | UBE2J1                | <b>-1.9</b> | -0.6        | -0.4        | <b>-1.8</b> |
| ubiquitin-like, containing PHD and RING finger domains, 1          | UHRF1                 | <b>-2.0</b> | <b>-2.2</b> | -0.3        | -0.6        |
| UDP-N-acetylglucosamine pyrophosphorylase 1                        | UAP1                  | -0.7        | <b>-1.4</b> | -0.3        | <b>-1.3</b> |
| <b>unc-13 homolog C (C. elegans)</b>                               | UNC13C                | <b>-1.2</b> | <b>-1.9</b> | <b>-1.0</b> | <b>-2.2</b> |
| <b>unc-13 homolog C (C. elegans)</b>                               | UNC13C                | <b>-1.1</b> | <b>-1.6</b> | <b>-1.1</b> | <b>-1.9</b> |
| <b>unc-13 homolog C (C. elegans)</b>                               | UNC13C                | <b>-1.1</b> | <b>-1.5</b> | <b>-1.1</b> | <b>-1.8</b> |
| uracil-DNA glycosylase                                             | UNG                   | -0.5        | <b>-2.1</b> | -0.6        | <b>-1.4</b> |
| valyl-tRNA synthetase 2                                            | VARS2                 | -0.5        | <b>-1.1</b> | -0.6        | <b>-1.5</b> |
| valyl-tRNA synthetase 2                                            | VARS2                 | -0.4        | -0.7        | -0.4        | <b>-1.2</b> |
| vitamin K epoxide reductase complex, subunit 1                     | VKORC1                | -0.9        | -0.7        | -0.2        | <b>-1.0</b> |
| v-myb myeloblastosis viral oncogene homolog (avian)                | MYB                   | <b>-1.2</b> | <b>-1.4</b> | -0.7        | <b>-1.8</b> |
| V-myb myeloblastosis viral oncogene homolog (avian)-like 1         | MYBL1                 | <b>-1.8</b> | <b>-1.4</b> | -0.6        | <b>-1.4</b> |
| v-myc myelocytomatosis viral oncogene homolog (avian)              | MYC                   | <b>-1.3</b> | -0.4        | -0.4        | <b>-1.4</b> |
| WD repeat domain 4                                                 | WDR4                  | -0.5        | -0.8        | -0.8        | <b>-1.4</b> |
| WD repeat domain 4                                                 | WDR4                  | -0.5        | -0.7        | -0.7        | <b>-1.5</b> |
| Wolf-Hirschhorn syndrome candidate 1                               | WHSC1                 | -0.7        | <b>-1.8</b> | -0.2        | <b>-1.4</b> |
| YEATS domain containing 4                                          | YEATS4                | -0.6        | <b>-1.2</b> | -0.5        | -0.5        |
| zinc finger protein 580                                            | ZNF580                | -0.7        | <b>-1.3</b> | -0.3        | -0.9        |
| Zinc finger protein, subfamily 1A, 1 (Ikaros)                      | ZNFN1A1               | -0.7        | -0.4        | -0.3        | <b>-1.0</b> |
| zinc finger protein, subfamily 1A, 1 (Ikaros)                      | ZNFN1A1               | -0.7        | -0.3        | -0.3        | -0.9        |
